# Supplementary material for: DFT study on Rh( ii )/guanidine-catalyzed asymmetric N–H bond insertion of benzophenone imines
Source: Royal Society of Chemistry journal article supplement (doi:10.1039/d5ob00001g), 2025-01-01
Supplement: d5ob00001g1.pdf [file d5ob00001g1.pdf]

## Supporting information

### DFT Study on Rh(II)/Guanidine-Catalyzed Asymmetric N-H bond Insertion of Benzophenone Imine

Jiaying Xu, Qi Wei, Changwei Hu, and Zhishan Su\*

Key Laboratory of Green Chemistry and Technology, Ministry of Education;

National and Local Joint Engineering Laboratory of Energy Plant Biofuel Preparation and Utilization ; College of Chemistry, Sichuan University, Chengdu, Sichuan 610064, P. R. China.

\*Email: [suzhishan@scu.edu.cn](mailto:suzhishan@scu.edu.cn)

## Contents

|                                                                                                                                                                                                                                   |    |
|-----------------------------------------------------------------------------------------------------------------------------------------------------------------------------------------------------------------------------------|----|
| Figure S1 Optimized geometries of intermediates and transition states in the non-catalytic reaction. ....                                                                                                                         | 2  |
| Figure S2 Optimized geometries of intermediates and transition states in the catalytic reaction. ....                                                                                                                             | 4  |
| Figure S3 Optimized geometries of transition states in the C-N bond formation step, catalyzed by Rh <sub>2</sub> (OAc) <sub>4</sub> . Relative Gibbs energy was in kcal mol <sup>-1</sup> .....                                   | 5  |
| Figure S4 Optimized geometries of intermediate DP-IM and transition state DP-TS in the proton transfer from ylide to the guanidine catalyst G1. The Gibbs free energy of DP-IM was set to zero.                                   | 5  |
| Figure S5 Optimized geometries of transition states TS3-R and TS3-S. the noncovalent analysis was performed by Multiwfn 3.8 (dev). ....                                                                                           | 6  |
| Figure S6 Optimized geometries of transition states in the C-H formation step in the catalytic reactions using 1b~1d as substrates. ....                                                                                          | 7  |
| Figure S7 Optimized geometries of transition states of TS3-R, TS3-S, TS3-R-1d and TS3-S-1d....                                                                                                                                    | 8  |
| Figure S8 Optimized geometries of transition states in the C-H formation step in the reaction catalyzed by G2 and G3, respectively.....                                                                                           | 9  |
| Figure S9 The optimized geometries of TS3-R and TS3-R', with the CPh <sub>2</sub> moiety of the enolate ion oriented either <i>trans</i> or <i>cis</i> to the COOMe group, respectively. ....                                     | 9  |
| Table S1 Relative Gibbs free energies of two competing transition states in the H-shift step ( $\Delta G$ ) and their energy difference ( $\Delta\Delta G$ , in kcal mol <sup>-1</sup> ) catalyzed by G2 and G3 respectively..... | 10 |
| Table S2 Electronic energies ( $E_e$ ), enthalpies ( $H$ ) and Gibbs free energies ( $G$ ) for all stationary points (in Hartree), obtained at the B3LYP/6-311G**(SMD, CHCl <sub>3</sub> ) theoretical level. ....                | 10 |
| Cartesian coordinates of all structures. ....                                                                                                                                                                                     | 12 |

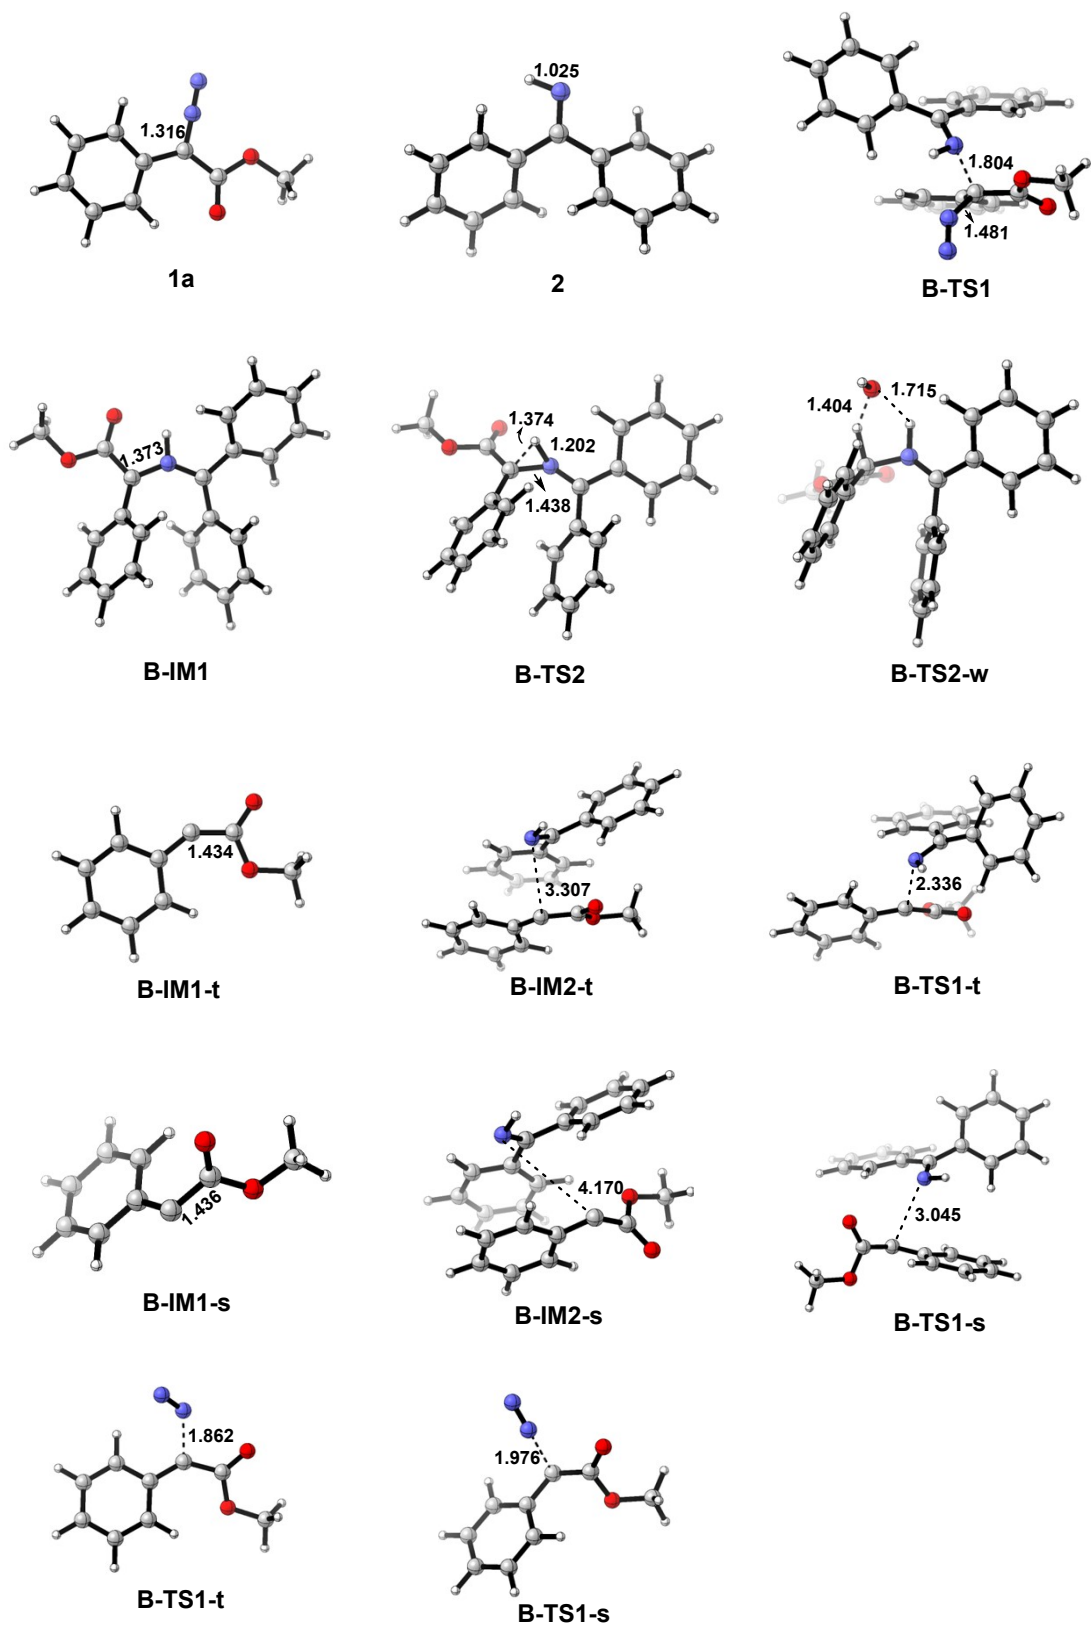

**Figure S1** Optimized geometries of intermediates and transition states in the non-catalytic reaction.

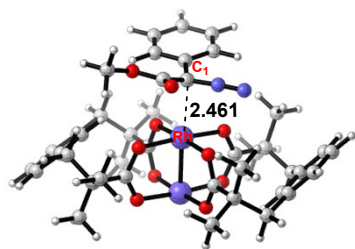

IM1

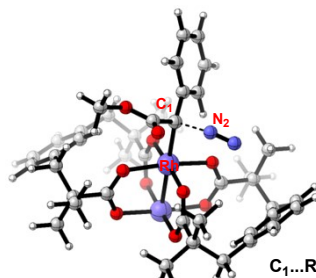

TS1

C<sub>1</sub>...Rh 2.146  
C<sub>1</sub>...N<sub>2</sub> 1.759

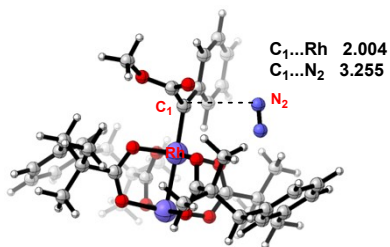

IM2

C<sub>1</sub>...Rh 2.004  
C<sub>1</sub>...N<sub>2</sub> 3.255

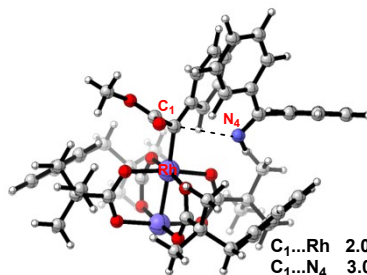

IM3

C<sub>1</sub>...Rh 2.000  
C<sub>1</sub>...N<sub>4</sub> 3.005

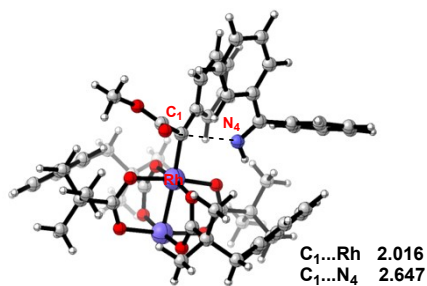

TS2

C<sub>1</sub>...Rh 2.016  
C<sub>1</sub>...N<sub>4</sub> 2.647

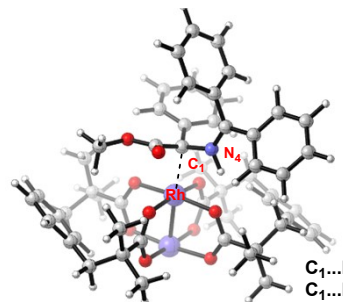

IM4

C<sub>1</sub>...Rh 2.280  
C<sub>1</sub>...N<sub>4</sub> 1.476

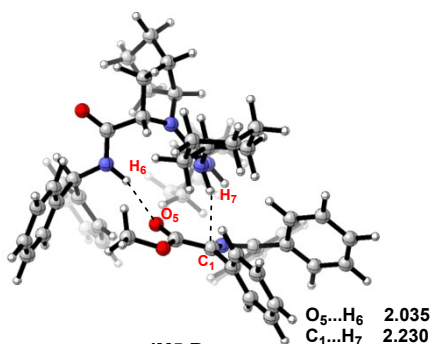

IM5-R

O<sub>5</sub>...H<sub>6</sub> 2.035  
C<sub>1</sub>...H<sub>7</sub> 2.230

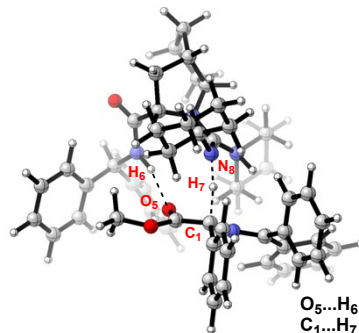

TS3-R

O<sub>5</sub>...H<sub>6</sub> 1.922  
C<sub>1</sub>...H<sub>7</sub> 1.433  
N<sub>8</sub>...H<sub>7</sub> 1.323

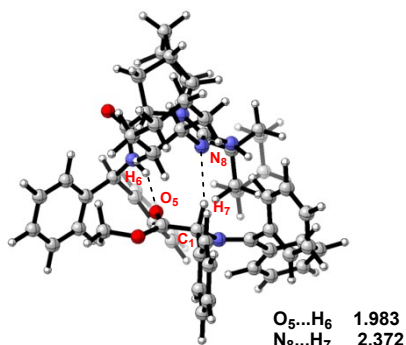

IM6-R

O<sub>5</sub>...H<sub>6</sub> 1.983  
N<sub>8</sub>...H<sub>7</sub> 2.372

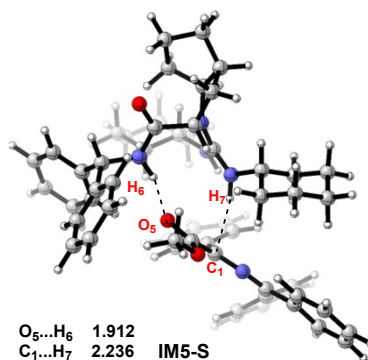

O<sub>5</sub>...H<sub>6</sub> 1.912  
C<sub>1</sub>...H<sub>7</sub> 2.236

IM5-S

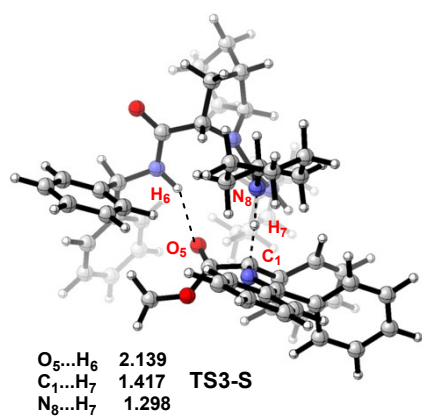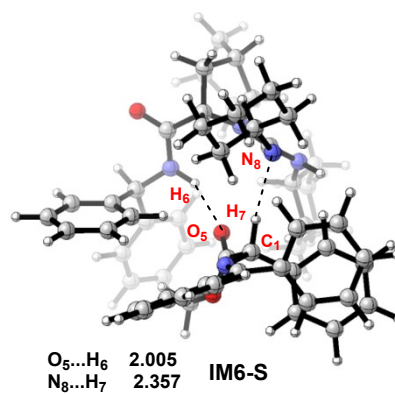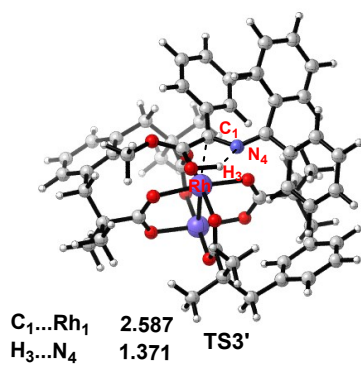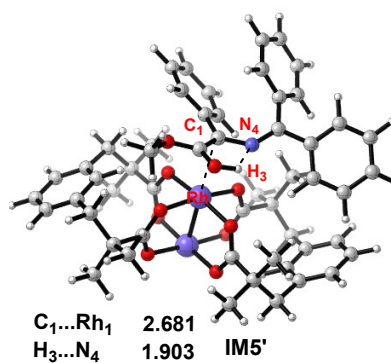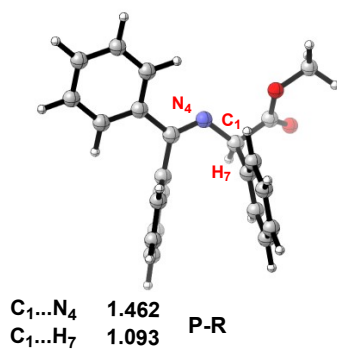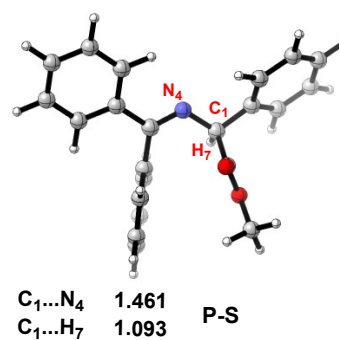

**Figure S2** Optimized geometries of intermediates and transition states in the catalytic reaction.

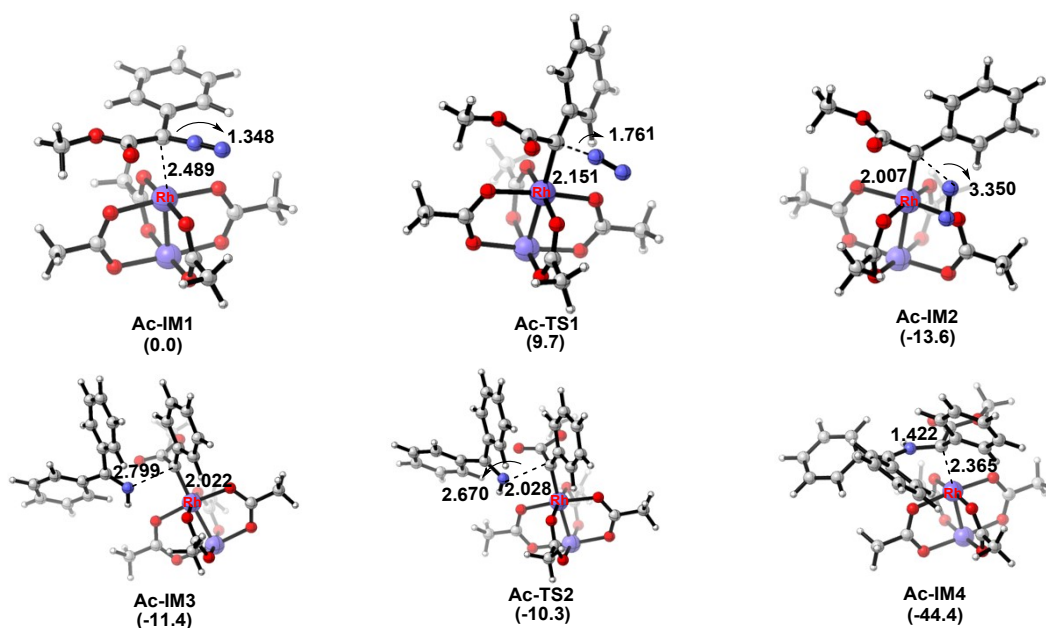

**Figure S3** Optimized geometries of transition states in the C-N bond formation step, catalyzed by  $\text{Rh}_2(\text{OAc})_4$ . Relative Gibbs energy was in  $\text{kcal mol}^{-1}$ .

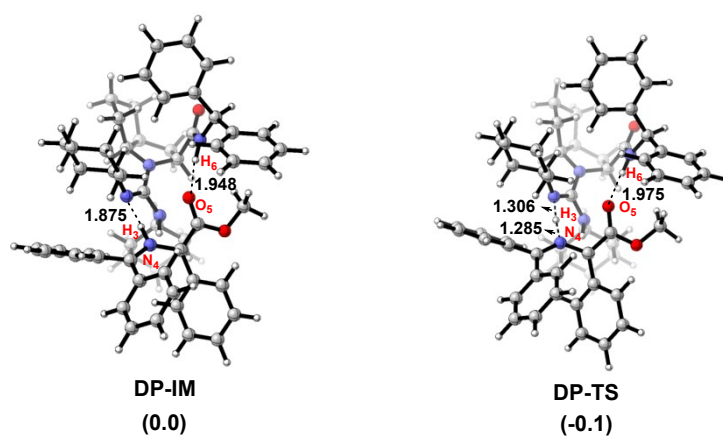

**Figure S4** Optimized geometries of intermediate DP-IM and transition state DP-TS in the proton transfer from ylide to the guanidine catalyst G1. The Gibbs free energy of DP-IM was set to zero.

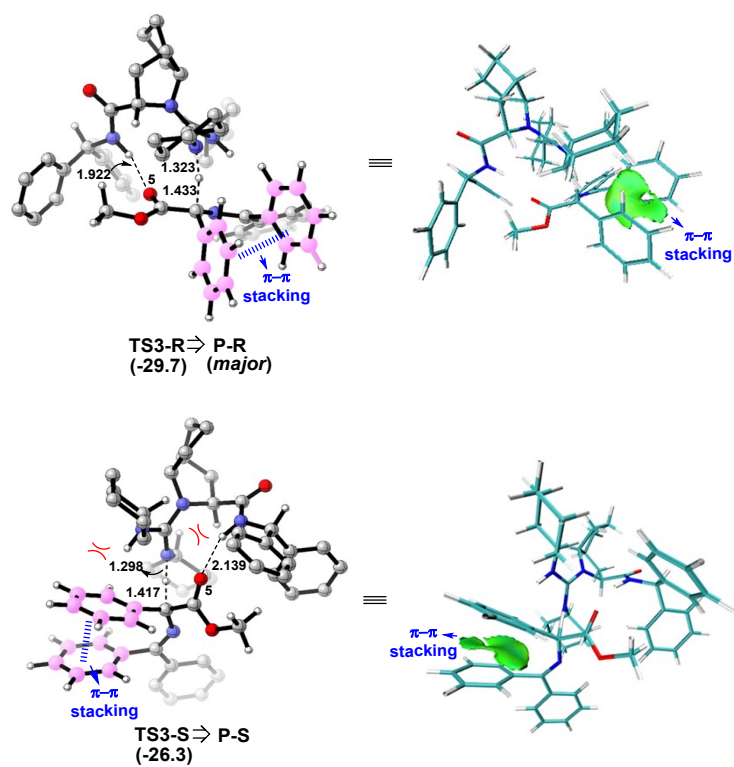

**Figure S5** Optimized geometries of transition states TS3-R and TS3-S. the noncovalent analysis was performed by Multiwfn 3.8 (dev).

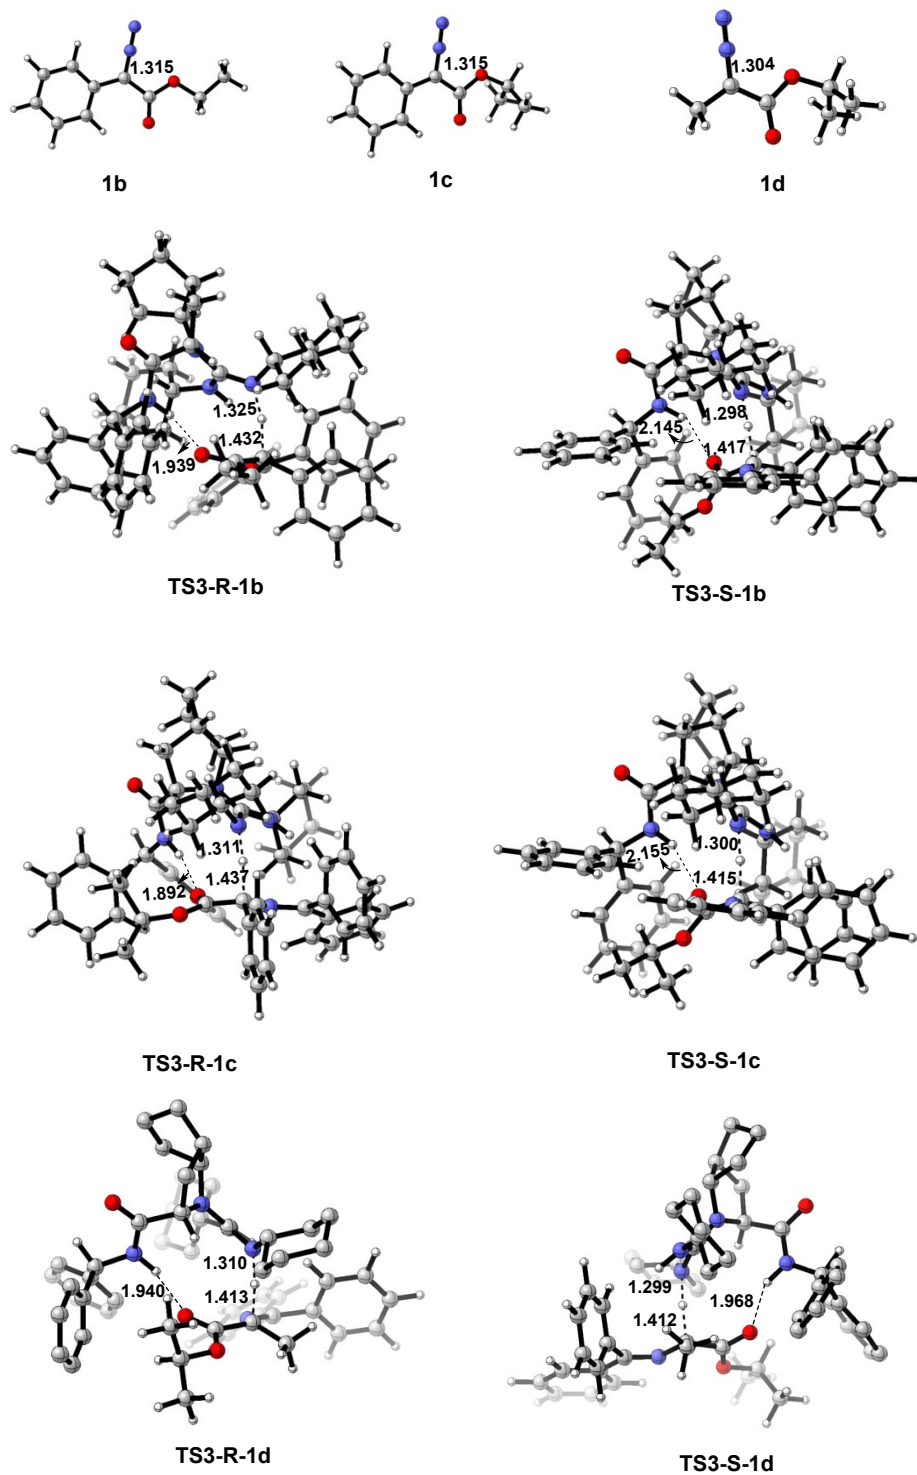

**Figure S6** Optimized geometries of transition states in the C-H formation step in the catalytic reactions using 1b~1d as substrates.

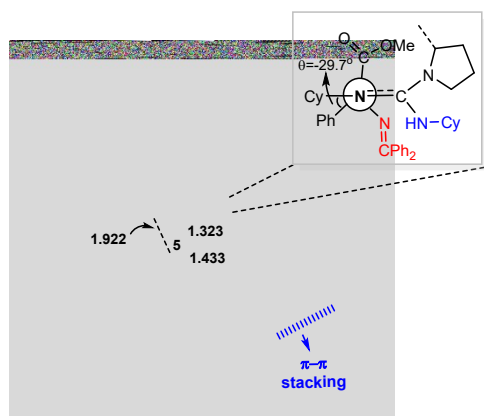

TS3-R  $\Rightarrow$  P-R  
(-29.7) (major)

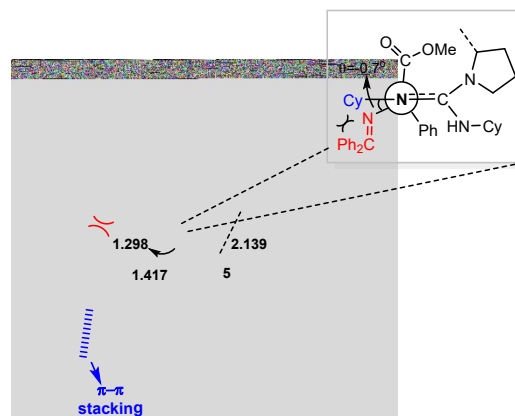

TS3-S  $\Rightarrow$  P-S  
(-26.3)

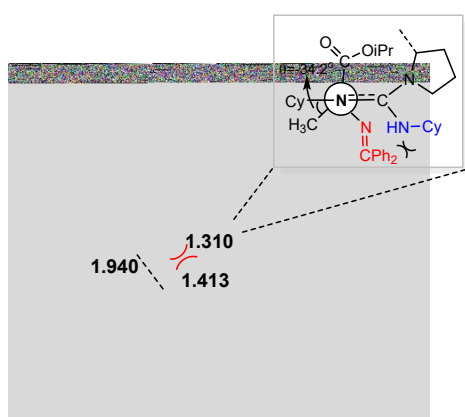

TS3-R-1d  $\Rightarrow$  P-R  
(-29.2)

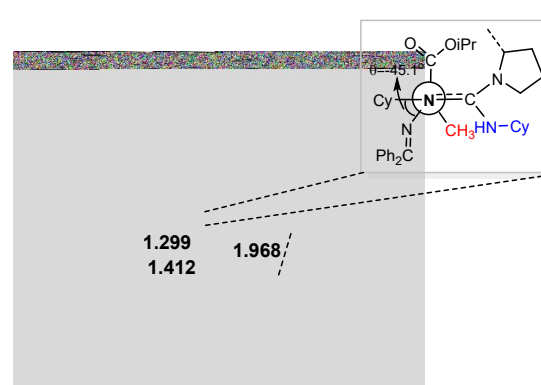

TS3-S-1d  $\Rightarrow$  P-S  
(-32.1) (major)

**Figure S7** Optimized geometries of transition states of TS3-R, TS3-S, TS3-R-1d and TS3-S-1d.



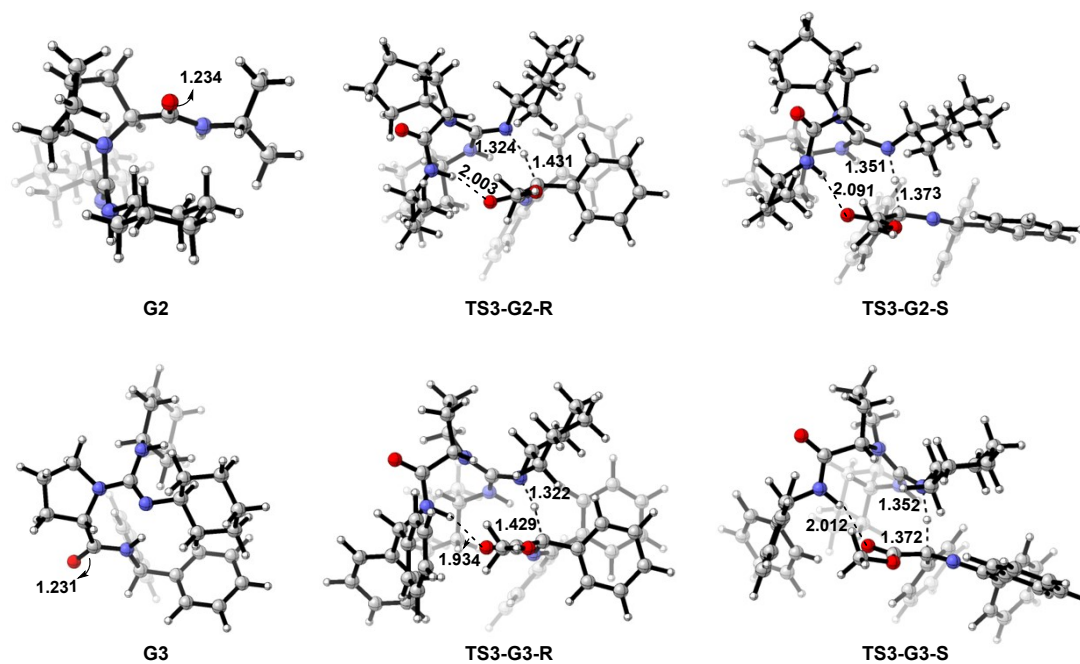

**Figure S8** Optimized geometries of transition states in the C-H formation step in the reaction catalyzed by G2 and G3, respectively.

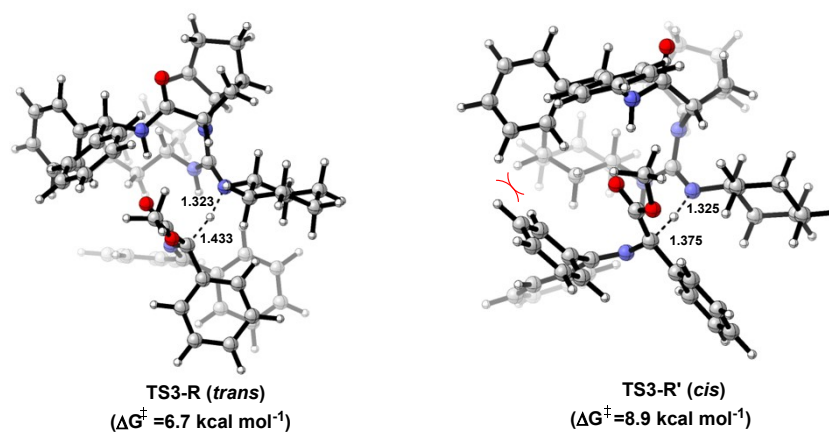

**Figure S9** The optimized geometries of TS3-R and TS3-R', with the CPh<sub>2</sub> moiety of the enolate ion oriented either *trans* or *cis* to the COOMe group, respectively.

**Table S1** Relative Gibbs free energies of two competing transition states in the H-shift step ( $\Delta G$ ) and their energy difference ( $\Delta\Delta G$ , in kcal mol<sup>-1</sup>) catalyzed by G2 and G3 respectively.

| Catalysts                                                                         | TSs      | $\Delta G$ | $\Delta\Delta G$ |
|-----------------------------------------------------------------------------------|----------|------------|------------------|
| 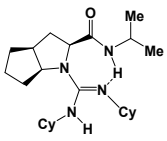 | TS3-G2-R | -29.9      | 0.5              |
|                                                                                   | TS3-G2-S | -29.4      |                  |
|  | TS3-G3-R | -22.0      | 0.9              |
|                                                                                   | TS3-G3-S | -21.1      |                  |

**Table S2** Electronic energies ( $E_e$ ), enthalpies ( $H$ ) and Gibbs free energies ( $G$ ) for all stationary points (in Hartree), obtained at the B3LYP-D3(BJ)/6-31G(d)(SMD, CHCl<sub>3</sub>) theoretical level.

| Structures                             | <sup>a</sup> ZPE | $E_e$       | <sup>b</sup> H <sub>corr</sub> | $H$         | <sup>c</sup> G <sub>corr</sub> | <sup>d</sup> G |
|----------------------------------------|------------------|-------------|--------------------------------|-------------|--------------------------------|----------------|
| <b>1a</b>                              | 0.15871          | -607.72983  | 0.16963                        | -607.71891  | 0.12401                        | -607.76453     |
| <b>2</b>                               | 0.20466          | -556.75395  | 0.21467                        | -556.74394  | 0.17119                        | -556.78742     |
| <b>B-TS1</b>                           | 0.36200          | -1164.41485 | 0.38273                        | -1164.39413 | 0.31533                        | -1164.46152    |
| <b>N<sub>2</sub></b>                   | 0.00561          | -109.54574  | 0.00863                        | -109.54271  | -0.01102                       | -109.56236     |
| <b>B-IM1</b>                           | 0.35729          | -1055.00388 | 0.37629                        | -1054.98488 | 0.31131                        | -1055.04986    |
| <b>B-TS2</b>                           | 0.35098          | -1054.92098 | 0.36982                        | -1054.90215 | 0.30567                        | -1054.96630    |
| <b>P-R</b>                             | 0.35671          | -1055.01084 | 0.37588                        | -1054.99167 | 0.30901                        | -1055.05853    |
| <b>H<sub>2</sub>O</b>                  | 0.02104          | -76.43346   | 0.02363                        | -76.43086   | 0.00516                        | -76.44934      |
| <b>B-TS2-w</b>                         | 0.37748          | -1131.40303 | 0.39812                        | -1131.38238 | 0.33021                        | -1131.45030    |
| <b>B-TS1-s</b>                         | 0.15444          | -607.67806  | 0.16605                        | -607.66644  | 0.11829                        | -607.71421     |
| <b>B-TS1-t</b>                         | 0.15365          | -607.66725  | 0.16522                        | -607.65568  | 0.11667                        | -607.70423     |
| <b>B-IM1-s</b>                         | 0.14729          | -498.14390  | 0.15683                        | -498.13435  | 0.11455                        | -498.17664     |
| <b>B-IM1-t</b>                         | 0.14678          | -498.14086  | 0.15632                        | -498.13133  | 0.11206                        | -498.17558     |
| <b>B-IM2-s</b>                         | 0.35306          | -1054.91270 | 0.37336                        | -1054.89240 | 0.30458                        | -1054.96117    |
| <b>B-IM2-t</b>                         | 0.35271          | -1054.90926 | 0.37290                        | -1054.88906 | 0.30364                        | -1054.95833    |
| <b>B-TS2-s</b>                         | 0.35236          | -1054.90343 | 0.37145                        | -1054.88434 | 0.30395                        | -1054.95185    |
| <b>B-TS2-t</b>                         | 0.35258          | -1054.90613 | 0.37205                        | -1054.88665 | 0.30459                        | -1054.95412    |
| <b>G1</b>                              | 0.75569          | -1617.47921 | 0.78665                        | -1617.44825 | 0.69161                        | -1617.54329    |
| <b>Rh<sub>2</sub>(esp)<sub>2</sub></b> | 0.67716          | -2066.80557 | 0.71263                        | -2066.77009 | 0.61709                        | -2066.86564    |
| <b>IM1</b>                             | 0.83732          | -2674.56330 | 0.88435                        | -2674.51627 | 0.76316                        | -2674.63746    |
| <b>TS1</b>                             | 0.83551          | -2674.54780 | 0.88224                        | -2674.50108 | 0.76274                        | -2674.62057    |
| <b>IM2</b>                             | 0.83482          | -2674.57956 | 0.88305                        | -2674.53134 | 0.75895                        | -2674.65544    |
| <b>IM3</b>                             | 1.03435          | -3121.79760 | 1.08997                        | -3121.74198 | 0.94949                        | -3121.88246    |
| <b>TS2</b>                             | 1.03456          | -3121.79696 | 1.08926                        | -3121.74226 | 0.95198                        | -3121.87953    |
| <b>IM4</b>                             | 1.03755          | -3121.84003 | 1.09216                        | -3121.78542 | 0.95496                        | -3121.92262    |
| <b>TS3'</b>                            | 1.03300          | -3121.82394 | 1.08702                        | -3121.76992 | 0.95289                        | -3121.90405    |

|                                        |         |             |         |             |         |             |
|----------------------------------------|---------|-------------|---------|-------------|---------|-------------|
| <b>IM5'</b>                            | 1.03653 | -3121.82727 | 1.09089 | -3121.77291 | 0.95589 | -3121.90791 |
| <b>IM5-R</b>                           | 1.11720 | -2672.50967 | 1.16593 | -2672.46095 | 1.03598 | -2672.59090 |
| <b>TS3-R</b>                           | 1.11139 | -2672.49767 | 1.16070 | -2672.44836 | 1.02887 | -2672.58019 |
| <b>IM6-R</b>                           | 1.11572 | -2672.51524 | 1.16579 | -2672.46517 | 1.03021 | -2672.60076 |
| <b>IM5-S</b>                           | 1.11718 | -2672.51274 | 1.16654 | -2672.46338 | 1.03515 | -2672.59477 |
| <b>TS3-S</b>                           | 1.11077 | -2672.49067 | 1.16023 | -2672.44121 | 1.02666 | -2672.57478 |
| <b>IM6-S</b>                           | 1.11683 | -2672.50913 | 1.16650 | -2672.45946 | 1.03307 | -2672.59289 |
| <b>P-S</b>                             | 0.35673 | -1055.01108 | 0.37588 | -1054.99193 | 0.30890 | -1055.05891 |
| <b>G3</b>                              | 0.69231 | -1500.77750 | 0.72070 | -1500.74911 | 0.63390 | -1500.83591 |
| <b>TS3-G3-R</b>                        | 1.04543 | -2555.78101 | 1.09239 | -2555.73404 | 0.96584 | -2555.86059 |
| <b>TS3-G3-S</b>                        | 1.04647 | -2555.77972 | 1.09380 | -2555.73238 | 0.96701 | -2555.85917 |
| <b>G2</b>                              | 0.65014 | -1233.97380 | 0.67556 | -1233.94838 | 0.59628 | -1234.02766 |
| <b>TS3-G2-R</b>                        | 1.00495 | -2288.99037 | 1.04902 | -2288.94630 | 0.93045 | -2289.06487 |
| <b>TS3-G2-S</b>                        | 1.00431 | -2288.99078 | 1.04763 | -2288.94746 | 0.93103 | -2289.06407 |
| <b>1b</b>                              | 0.18720 | -647.03722  | 0.19920 | -647.02522  | 0.15095 | -647.07346  |
| <b>TS3-R-1b</b>                        | 1.13937 | -2711.80621 | 1.18996 | -2711.75562 | 1.05572 | -2711.88987 |
| <b>TS3-S-1b</b>                        | 1.13952 | -2711.79956 | 1.18999 | -2711.74909 | 1.05495 | -2711.88412 |
| <b>1c</b>                              | 0.21532 | -686.34140  | 0.22840 | -686.32832  | 0.17782 | -686.37890  |
| <b>TS3-R-1c</b>                        | 1.16848 | -2751.11204 | 1.21970 | -2751.06082 | 1.08559 | -2751.19493 |
| <b>TS3-S-1c</b>                        | 1.16780 | -2751.10830 | 1.21915 | -2751.05695 | 1.08311 | -2751.19299 |
| <b>1d</b>                              | 0.16162 | -494.58704  | 0.17252 | -494.57614  | 0.12762 | -494.62104  |
| <b>TS3-R-1d</b>                        | 1.11588 | -2559.35572 | 1.16440 | -2559.30720 | 1.03572 | -2559.43588 |
| <b>TS3-S-1d</b>                        | 1.11497 | -2559.35647 | 1.16394 | -2559.30750 | 1.03090 | -2559.44054 |
| <b>Rh-IM-R</b>                         | 1.79717 | -4739.35807 | 1.88167 | -4739.27357 | 1.68171 | -4739.47353 |
| <b>Rh-TS-R</b>                         | 1.79154 | -4739.33456 | 1.87667 | -4739.24943 | 1.67305 | -4739.45305 |
| <b>Rh<sub>2</sub>(OAc)<sub>4</sub></b> | 0.21159 | -1135.42184 | 0.23092 | -1135.40252 | 0.16514 | -1135.46830 |
| <b>Ac-IM1</b>                          | 0.37151 | -1743.17248 | 0.40228 | -1743.14170 | 0.31113 | -1743.23285 |
| <b>Ac-TS1</b>                          | 0.36923 | -1743.15789 | 0.39995 | -1743.12717 | 0.30977 | -1743.21735 |
| <b>Ac-IM2</b>                          | 0.36843 | -1743.18990 | 0.40096 | -1743.15737 | 0.30379 | -1743.25453 |
| <b>Ac-IM3</b>                          | 0.56877 | -2190.40588 | 0.60799 | -2190.36667 | 0.49865 | -2190.47601 |
| <b>Ac-TS2</b>                          | 0.56859 | -2190.40600 | 0.60700 | -2190.36760 | 0.50029 | -2190.47431 |
| <b>Ac-IM4</b>                          | 0.57117 | -2190.45939 | 0.60963 | -2190.42092 | 0.50191 | -2190.52865 |
| <b>DP-TS</b>                           | 1.11107 | -2672.50901 | 1.15961 | -2672.46047 | 1.02934 | -2672.59074 |
| <b>DP-IM</b>                           | 1.11578 | -2672.51041 | 1.16385 | -2672.46234 | 1.03570 | -2672.59049 |
| <b>G-IM1</b>                           | 1.59782 | -4292.07983 | 1.67476 | -4292.00288 | 1.49072 | -4292.18692 |
| <b>G-TS1</b>                           | 1.59617 | -4292.05663 | 1.67362 | -4291.97918 | 1.48743 | -4292.16537 |
| <b>TS3-R'</b>                          | 1.11176 | -2672.49533 | 1.16108 | -2672.44602 | 1.02880 | -2672.57830 |

<sup>a</sup> Zero-point correction energy;

<sup>b</sup> Thermal correction to enthalpy;

<sup>c</sup> Thermal correction to Gibbs free energy.

<sup>d</sup> Gibbs free energy obtained at the B3LYP-D3(BJ)/6-311G(d,p)(SMD, CHCl<sub>3</sub>)/B3LYP-D3(BJ)/6-31G(d)(SMD, CHCl<sub>3</sub>) theoretical level.

**Cartesian coordinates of all structures.****1a**

|   |             |             |             |
|---|-------------|-------------|-------------|
| C | -1.66033200 | -1.27540800 | -0.13752300 |
| C | -1.30914600 | 0.08264900  | -0.04200000 |
| C | -2.32851800 | 1.02921800  | 0.17149400  |
| C | -3.65694100 | 0.62936700  | 0.28353700  |
| C | -3.99993900 | -0.72086200 | 0.18941100  |
| C | -2.99403200 | -1.66428200 | -0.02051800 |
| H | -0.88873900 | -2.01574200 | -0.29803700 |
| H | -2.08898400 | 2.08558200  | 0.25330300  |
| H | -4.42570300 | 1.37929800  | 0.44793600  |
| H | -5.03686000 | -1.03165000 | 0.27809600  |
| H | -3.24348300 | -2.71916200 | -0.09703700 |
| C | 0.09599600  | 0.51549600  | -0.16845500 |
| C | 1.28594600  | -0.34197900 | -0.23227300 |
| O | 2.41470700  | 0.39455400  | -0.33057000 |
| O | 1.27601600  | -1.56017700 | -0.20085200 |
| C | 3.64045700  | -0.35571900 | -0.40878800 |
| H | 4.42938200  | 0.39170600  | -0.49596900 |
| H | 3.63658100  | -1.00891100 | -1.28512700 |
| N | 0.34172700  | 1.80705100  | -0.21492600 |
| N | 0.53241700  | 2.92713400  | -0.25449100 |
| H | 3.78295400  | -0.95439200 | 0.49472200  |

**1b**

|   |             |             |             |
|---|-------------|-------------|-------------|
| C | -1.39443300 | -1.24879000 | 0.12403400  |
| C | -0.94758900 | 0.07974500  | 0.01433200  |
| C | -1.90374800 | 1.10428300  | -0.11568200 |
| C | -3.26364100 | 0.80830300  | -0.13365600 |
| C | -3.70184200 | -0.51313700 | -0.02606400 |
| C | -2.75900000 | -1.53336100 | 0.10153700  |
| H | -0.67206800 | -2.04751800 | 0.22119100  |
| H | -1.58948500 | 2.14026100  | -0.20596900 |
| H | -3.98233500 | 1.61667800  | -0.23564300 |
| H | -4.76326500 | -0.74290100 | -0.04161300 |
| H | -3.08283500 | -2.56708400 | 0.18735300  |
| C | 0.49201200  | 0.40205300  | 0.04186100  |
| C | 1.61529300  | -0.54396000 | -0.01126700 |
| O | 2.79922900  | 0.10198600  | 0.01709000  |
| O | 1.50514500  | -1.75652400 | -0.07602600 |
| C | 3.98420200  | -0.73199400 | -0.04334200 |
| H | 3.94777400  | -1.32385300 | -0.96274700 |
| H | 3.97201600  | -1.42044800 | 0.80694100  |

|   |            |             |             |
|---|------------|-------------|-------------|
| N | 0.83932300 | 1.66940100  | 0.09658700  |
| N | 1.12115100 | 2.76991100  | 0.14495600  |
| C | 5.18290800 | 0.19084300  | -0.01083300 |
| H | 6.10163100 | -0.40336900 | -0.06704400 |
| H | 5.16765300 | 0.88366200  | -0.85879900 |
| H | 5.20583500 | 0.77368600  | 0.91598000  |

**1c**

|   |             |             |             |
|---|-------------|-------------|-------------|
| C | -1.49768700 | -1.27485200 | 0.09193600  |
| C | -1.01080600 | 0.04127400  | 0.00209400  |
| C | -1.93698400 | 1.09643800  | -0.09864300 |
| C | -3.30534200 | 0.84342700  | -0.10591100 |
| C | -3.78333800 | -0.46556300 | -0.01666200 |
| C | -2.87084200 | -1.51628900 | 0.08035200  |
| H | -0.79924600 | -2.09687500 | 0.16615000  |
| H | -1.59160100 | 2.12331400  | -0.17559100 |
| H | -3.99899800 | 1.67597900  | -0.18428900 |
| H | -4.85149000 | -0.66209500 | -0.02348400 |
| H | -3.22593900 | -2.54092900 | 0.15004800  |
| C | 0.43715600  | 0.32471700  | 0.01911700  |
| C | 1.53937000  | -0.65095800 | -0.01462900 |
| O | 2.72897400  | -0.02002100 | 0.00304200  |
| O | 1.38168200  | -1.85976600 | -0.05510200 |
| C | 3.97790200  | -0.78828300 | -0.04283100 |
| N | 0.81401200  | 1.58400700  | 0.05599900  |
| N | 1.11789000  | 2.67926700  | 0.08990400  |
| H | 4.71603200  | 0.01791700  | -0.01668500 |
| C | 4.14510400  | -1.65184200 | 1.20061700  |
| H | 3.45328900  | -2.49668800 | 1.19927000  |
| H | 5.17008700  | -2.03829100 | 1.23268500  |
| H | 3.97825700  | -1.05697600 | 2.10504900  |
| C | 4.11543400  | -1.54166000 | -1.35922800 |
| H | 5.13560100  | -1.93272600 | -1.44357300 |
| H | 3.41485600  | -2.37705700 | -1.41841300 |
| H | 3.93923700  | -0.86950000 | -2.20586100 |

**1d**

|   |             |             |             |
|---|-------------|-------------|-------------|
| C | -0.01336100 | 0.41794800  | -0.02743000 |
| C | -1.06245500 | -0.59697800 | 0.02966400  |
| O | -2.29492900 | -0.05058400 | 0.00937500  |
| O | -0.80332700 | -1.78957800 | 0.08734800  |
| C | -3.48283200 | -0.90615600 | 0.05793400  |
| N | -0.37269500 | 1.67048000  | -0.08401100 |
| N | -0.68591900 | 2.76656900  | -0.13480400 |

|               |             |             |             |    |             |             |             |
|---------------|-------------|-------------|-------------|----|-------------|-------------|-------------|
| H             | -4.28117200 | -0.15899200 | 0.02587900  | O  | 1.36520500  | 3.12131800  | 1.60545000  |
| C             | 1.44572100  | 0.05113600  | -0.01335600 | O  | 2.21568100  | 2.70598400  | -0.44810400 |
| H             | 1.70809900  | -0.45697600 | 0.92146200  | C  | 1.89725200  | 4.05872600  | -0.83233700 |
| H             | 1.67511500  | -0.62814000 | -0.84136200 | H  | 2.12443700  | 4.11304400  | -1.89700900 |
| H             | 2.06999300  | 0.94323400  | -0.11138900 | H  | 2.51523000  | 4.76638800  | -0.27372800 |
| C             | -3.58216700 | -1.78860200 | -1.17978000 | C  | 3.03869100  | -0.04815500 | 0.46679300  |
| H             | -2.81740500 | -2.56794100 | -1.17586600 | C  | 3.65671000  | 0.21042700  | -0.76663700 |
| H             | -4.56903500 | -2.26456100 | -1.20406100 | C  | 3.32855100  | -1.25597500 | 1.12585900  |
| H             | -3.47290200 | -1.18781400 | -2.08913800 | C  | 4.54135500  | -0.71652500 | -1.31661100 |
| C             | -3.56802200 | -1.66374900 | 1.37676600  | H  | 3.43546400  | 1.12260200  | -1.30073000 |
| H             | -3.44868800 | -0.97734700 | 2.22200600  | C  | 4.21070100  | -2.17684900 | 0.56697300  |
| H             | -4.55448200 | -2.13415900 | 1.45831100  | H  | 2.85677200  | -1.49383600 | 2.07291400  |
| H             | -2.80322400 | -2.44045600 | 1.44025400  | C  | 4.82351600  | -1.91440000 | -0.65967000 |
|               |             |             |             | H  | 5.00914600  | -0.49515100 | -2.27202300 |
| <b>2</b>      |             |             |             | H  | 4.41725300  | -3.10239600 | 1.09696600  |
| C             | -1.37716800 | -0.64521500 | -0.61323100 | H  | 5.51190200  | -2.63279600 | -1.09507200 |
| C             | -2.59633200 | -1.31996100 | -0.67818200 | N  | 1.72412500  | 0.65536600  | 2.34323900  |
| C             | -3.74182800 | -0.75294300 | -0.11806200 | N  | 1.40345300  | 0.42087500  | 3.39579300  |
| C             | -3.66530900 | 0.49815600  | 0.50138400  | H  | 0.84075800  | 4.25939300  | -0.65167800 |
| C             | -2.45159000 | 1.17726100  | 0.55712500  | Rh | -2.22467900 | -0.77056500 | -0.64258600 |
| C             | -1.29134800 | 0.61203600  | 0.00400300  | C  | -0.75333200 | -2.58673400 | 1.07852700  |
| C             | -0.01143100 | 1.37461900  | 0.04018800  | C  | -0.52802200 | -3.84011100 | 1.88171900  |
| C             | 1.27563300  | 0.61592900  | 0.02904200  | O  | -1.82259400 | -2.50633000 | 0.39303100  |
| C             | 2.35228300  | 1.07562100  | -0.74438600 | O  | 0.75260600  | -0.65034600 | -1.51183700 |
| C             | 3.57477500  | 0.40658900  | -0.72555900 | C  | 0.75199200  | -1.76751500 | -3.60305100 |
| C             | 3.74077100  | -0.72535500 | 0.07561200  | C  | 0.04705600  | -1.27776500 | -2.36552000 |
| C             | 2.67617400  | -1.18858600 | 0.85170500  | O  | -1.20439300 | -1.49965000 | -2.27495700 |
| C             | 1.44799300  | -0.52956200 | 0.82132100  | O  | 0.13977500  | -1.68011800 | 1.17045400  |
| N             | -0.06980300 | 2.65911500  | 0.08050800  | O  | -2.51255300 | 1.01603200  | -1.62913700 |
| H             | -0.49280500 | -1.08972500 | -1.05738400 | O  | -1.15280100 | 0.80500000  | 1.82611000  |
| H             | -2.64991800 | -2.28798000 | -1.16837100 | O  | -3.12561700 | 0.00978800  | 1.04517500  |
| H             | -4.55332800 | 0.94260400  | 0.94228000  | C  | -3.10980900 | 1.21334500  | 3.10052000  |
| H             | -2.38264100 | 2.15000400  | 1.03238900  | C  | -2.41292900 | 0.62235700  | 1.90357400  |
| H             | 2.22081900  | 1.94901200  | -1.37721900 | O  | -0.55974800 | 1.84528800  | -0.83191300 |
| H             | 4.39572200  | 0.76541500  | -1.33988900 | C  | -1.63675900 | 1.93190300  | -1.50719600 |
| H             | 2.80105300  | -2.06592500 | 1.48007000  | C  | -1.89490700 | 3.24617300  | -2.19638300 |
| H             | 0.62257300  | -0.89281400 | 1.42526500  | Rh | -0.13505700 | 0.10351500  | 0.18478200  |
| H             | 0.87607400  | 3.05087000  | 0.13835200  | H  | 0.24420700  | -2.64307800 | -4.01375900 |
| H             | 4.69414900  | -1.24586200 | 0.09237500  | H  | 0.73087900  | -0.97054500 | -4.35688200 |
| H             | -4.68972300 | -1.28212700 | -0.16240400 | H  | 1.79545200  | -1.99983500 | -3.37859700 |
|               |             |             |             | H  | -1.15763500 | -4.65364500 | 1.51673700  |
|               |             |             |             | H  | -0.78436600 | -3.63576100 | 2.92844600  |
| <b>Ac-IM1</b> |             |             |             | H  | 0.52590400  | -4.12844400 | 1.84373500  |
| C             | 2.05306400  | 0.90385600  | 1.05960400  | H  | -3.28127900 | 2.28065500  | 2.91443400  |
| C             | 1.84748000  | 2.35886900  | 0.78685800  |    |             |             |             |

|   |             |            |             |    |             |             |             |
|---|-------------|------------|-------------|----|-------------|-------------|-------------|
| H | -2.47836600 | 1.12453800 | 3.98829500  | C  | -2.41174800 | 3.35426900  | -1.79596700 |
| H | -4.07302200 | 0.72713900 | 3.26753700  | Rh | -0.09426500 | 0.10603400  | -0.14289000 |
| H | -2.20024200 | 3.98472600 | -1.44559100 | H  | -0.22674300 | -2.81160900 | -3.75358300 |
| H | -2.68835000 | 3.14762800 | -2.93955000 | H  | -1.95272400 | -2.49089800 | -4.09289500 |
| H | -0.97720100 | 3.60744600 | -2.66880700 | H  | -0.69669000 | -1.29230700 | -4.52276700 |

### Ac-IM2

|    |             |             |             |
|----|-------------|-------------|-------------|
| C  | 1.83286000  | 0.65964900  | -0.22829100 |
| C  | 2.06418500  | 2.08637700  | 0.09642600  |
| O  | 2.21755000  | 2.49180400  | 1.23516000  |
| O  | 2.03521300  | 2.85770600  | -0.99688100 |
| C  | 2.07367800  | 4.28101700  | -0.76310400 |
| H  | 2.03492100  | 4.73703400  | -1.75197100 |
| H  | 2.99579300  | 4.56235100  | -0.24841100 |
| C  | 2.97452800  | -0.16349900 | -0.45495500 |
| C  | 4.29101900  | 0.31853100  | -0.20291300 |
| C  | 2.81958100  | -1.49587100 | -0.92636500 |
| C  | 5.39108200  | -0.49989200 | -0.39493500 |
| H  | 4.42850900  | 1.32643200  | 0.17407100  |
| C  | 3.93020500  | -2.29928000 | -1.13829700 |
| H  | 1.82500300  | -1.86032200 | -1.13788200 |
| C  | 5.21181100  | -1.80805900 | -0.86565500 |
| H  | 6.38937200  | -0.12966900 | -0.18400400 |
| H  | 3.80519600  | -3.31150000 | -1.51019100 |
| H  | 6.07768700  | -2.44499700 | -1.02248600 |
| N  | 2.47497500  | -0.34172700 | 2.90312000  |
| N  | 1.51212400  | -0.62578000 | 3.36330200  |
| H  | 1.20890300  | 4.58679700  | -0.16892100 |
| Rh | -2.45727400 | -0.57483700 | 0.01942400  |
| C  | -0.56960600 | -2.48464500 | 1.12527200  |
| C  | -0.13228600 | -3.72420700 | 1.86231100  |
| O  | -1.81160800 | -2.30641900 | 0.94353900  |
| O  | -0.07660000 | -0.82001700 | -1.98997900 |
| C  | -1.00607500 | -2.04231800 | -3.78724100 |
| C  | -1.13159700 | -1.39516800 | -2.43171000 |
| O  | -2.24676900 | -1.46431100 | -1.83426900 |
| O  | 0.36411600  | -1.69042100 | 0.76186900  |
| O  | -2.93734000 | 1.21364500  | -0.89361800 |
| O  | -0.35186300 | 0.98048400  | 1.70188500  |
| O  | -2.52461600 | 0.34778900  | 1.85986200  |
| C  | -1.52834000 | 1.51051100  | 3.68324700  |
| C  | -1.47474100 | 0.90553400  | 2.30446400  |
| O  | -0.76076400 | 1.84728800  | -1.02305400 |
| C  | -2.01423500 | 2.02892000  | -1.19736400 |

|   |             |             |             |
|---|-------------|-------------|-------------|
| H | -0.90918400 | -4.49049700 | 1.82431000  |
| H | 0.05105900  | -3.46080300 | 2.91123300  |
| H | 0.80244500  | -4.10685500 | 1.44425100  |
| H | -0.89446800 | 2.39901800  | 3.73596700  |
| H | -1.14342200 | 0.77661300  | 4.40174100  |
| H | -2.55707200 | 1.75750700  | 3.95417400  |
| H | -2.37233700 | 4.12064700  | -1.01221500 |
| H | -3.42796000 | 3.30871600  | -2.19235800 |
| H | -1.70919200 | 3.64146000  | -2.58271500 |

### Ac-IM3

|   |             |             |             |
|---|-------------|-------------|-------------|
| H | -1.36275000 | 1.19736400  | -1.18299400 |
| C | -5.14053300 | -0.34209400 | 0.39542300  |
| C | -6.03161400 | -1.40548600 | 0.54245500  |
| C | -5.99511100 | -2.47905200 | -0.35019300 |
| C | -5.05380200 | -2.49169600 | -1.38363100 |
| C | -4.15273600 | -1.43933800 | -1.52094100 |
| C | -4.19073100 | -0.34935900 | -0.63821100 |
| C | -3.18515600 | 0.74233700  | -0.77307700 |
| C | -3.59815500 | 2.14896900  | -0.50003400 |
| C | -2.66856500 | 3.07127200  | 0.00938100  |
| C | -3.03001000 | 4.40345900  | 0.19786600  |
| C | -4.31941100 | 4.83710300  | -0.12467600 |
| C | -5.24930200 | 3.92770000  | -0.63210200 |
| C | -4.89357000 | 2.59101700  | -0.81302800 |
| N | -2.00121700 | 0.40031000  | -1.13733500 |
| H | -5.16981400 | 0.49027700  | 1.09141900  |
| H | -6.75579800 | -1.39341700 | 1.35237600  |
| H | -5.01901900 | -3.32577200 | -2.07892900 |
| H | -3.41009100 | -1.44497400 | -2.31123200 |
| H | -1.67802700 | 2.72733200  | 0.28250700  |
| H | -2.30672900 | 5.10492400  | 0.60459200  |
| H | -6.25183600 | 4.25756800  | -0.89010100 |
| H | -5.61850400 | 1.89032200  | -1.21426500 |
| H | -4.59774800 | 5.87715000  | 0.02182000  |
| H | -6.69726400 | -3.30122600 | -0.24174900 |
| C | -0.90188100 | -0.09878700 | 2.02226800  |
| O | -0.49039000 | -0.71774300 | 3.14427600  |
| O | -1.47960000 | 0.97087000  | 2.00571900  |

|    |             |             |             |   |             |             |             |
|----|-------------|-------------|-------------|---|-------------|-------------|-------------|
| C  | -0.57780800 | 0.06083400  | 4.35333300  | H | 1.21535000  | -2.04761900 | -4.15276000 |
| H  | -0.04623100 | 1.00699500  | 4.23073200  | H | 0.57465800  | -0.43652700 | -4.49146900 |
| H  | -0.10418300 | -0.54663400 | 5.12463700  |   |             |             |             |
| H  | -1.62263700 | 0.25417600  | 4.61058900  |   |             |             |             |
| C  | -0.70876000 | -2.94554200 | -0.49597000 | H | 1.46597900  | -0.92985700 | 1.85446200  |
| C  | -1.15710800 | -2.08762000 | 0.54195000  | C | 4.56457200  | 0.56714300  | -0.85917200 |
| C  | -2.29419000 | -2.47967800 | 1.30087500  | C | 5.07367000  | 1.44898500  | -1.80927600 |
| C  | -2.93169600 | -3.68414400 | 1.05112100  | C | 4.20408100  | 2.17357900  | -2.62792900 |
| C  | -2.46059100 | -4.52058900 | 0.03265700  | C | 2.82390300  | 2.01130000  | -2.48829100 |
| C  | -1.35451600 | -4.14811600 | -0.74089300 | C | 2.30797400  | 1.14701000  | -1.52652400 |
| H  | 0.13728100  | -2.63810700 | -1.09410600 | C | 3.17486000  | 0.41626300  | -0.69823200 |
| H  | -2.66974700 | -1.82822900 | 2.08193300  | C | 2.69154500  | -0.48081300 | 0.36394000  |
| H  | -3.80090900 | -3.96965100 | 1.63395400  | C | 3.33874300  | -1.79292900 | 0.56381600  |
| H  | -2.96348100 | -5.46341100 | -0.16383400 | C | 3.41914600  | -2.38418700 | 1.83855000  |
| H  | -1.00317100 | -4.80110200 | -1.53411600 | C | 3.97791100  | -3.65005500 | 1.99548100  |
| C  | -0.46641000 | -0.87148800 | 0.82756400  | C | 4.47417000  | -4.34254600 | 0.88824900  |
| O  | 1.84467000  | 0.46979100  | 1.96872900  | C | 4.41419800  | -3.75765500 | -0.37895200 |
| C  | 2.99233200  | 0.99927700  | 2.15193900  | C | 3.85513900  | -2.49241500 | -0.54192900 |
| O  | 3.88781500  | 1.16345900  | 1.26931500  | N | 1.71876500  | -0.18506100 | 1.19627100  |
| C  | 3.27739800  | 1.48777900  | 3.55000000  | H | 5.24298100  | 0.01037000  | -0.22092200 |
| H  | 2.92355600  | 0.75886900  | 4.28430900  | H | 6.14833800  | 1.57024300  | -1.90895200 |
| H  | 4.34484600  | 1.67232400  | 3.68476100  | H | 2.14006300  | 2.57105500  | -3.11971800 |
| H  | 2.73180100  | 2.42451600  | 3.71603200  | H | 1.23847800  | 1.04171800  | -1.42755000 |
| Rh | 3.49851600  | 0.59573900  | -0.67932700 | H | 3.07532800  | -1.84427700 | 2.71616100  |
| Rh | 1.28492100  | -0.18238600 | 0.08715700  | H | 4.03837700  | -4.08907700 | 2.98681300  |
| C  | 3.41677700  | -2.17755800 | 0.18515800  | H | 4.79857300  | -4.28920000 | -1.24451400 |
| O  | 4.20971300  | -1.30188800 | -0.27432300 | H | 3.79806100  | -2.04808700 | -1.52865800 |
| O  | 2.17158600  | -2.01252200 | 0.42729600  | H | 4.91287900  | -5.32807300 | 1.01380100  |
| C  | 3.97077300  | -3.54422200 | 0.49913900  | H | 4.60063000  | 2.86062200  | -3.37008500 |
| H  | 3.34351400  | -4.31527900 | 0.04095900  | C | 0.21104500  | 0.69681700  | 2.73731600  |
| H  | 4.99833500  | -3.63719200 | 0.14317700  | O | -0.50394900 | 1.75252300  | 3.14752700  |
| H  | 3.94647800  | -3.69963800 | 1.58382600  | O | 0.36192600  | -0.31738000 | 3.41312500  |
| O  | 2.64163100  | 2.44177400  | -1.03462300 | C | -1.27251500 | 1.55869700  | 4.34296900  |
| O  | 0.60540400  | 1.72568700  | -0.33607800 | H | -1.97142100 | 0.72761000  | 4.21724000  |
| C  | 1.40996500  | 2.61152600  | -0.78879500 | H | -1.81623000 | 2.49221200  | 4.49187700  |
| C  | 0.82617800  | 3.98255300  | -1.01899200 | H | -0.62036400 | 1.36251300  | 5.19870500  |
| H  | 0.69692900  | 4.47847600  | -0.04956500 | C | 0.31888700  | 3.24700200  | 0.64950000  |
| H  | 1.49312000  | 4.58532300  | -1.63835100 | C | 1.24094100  | 2.27706300  | 1.06504200  |
| H  | -0.15805200 | 3.90456800  | -1.48794800 | C | 2.57597300  | 2.66447600  | 1.26346400  |
| O  | 0.93211900  | -0.72536600 | -1.87145300 | C | 2.98967400  | 3.96890300  | 0.99999300  |
| O  | 2.97044600  | -0.02091600 | -2.57900300 | C | 2.06890300  | 4.91914800  | 0.55409200  |
| C  | 1.82799500  | -0.53963400 | -2.76386600 | C | 0.73009100  | 4.55450300  | 0.39440800  |
| C  | 1.46490800  | -0.98119700 | -4.15919300 | H | -0.71758300 | 2.96570200  | 0.52216300  |
| H  | 2.28883000  | -0.79880800 | -4.85121200 | H | 3.30037900  | 1.94076800  | 1.62261700  |

**Ac-IM4**

|               |             |             |             |    |             |             |             |
|---------------|-------------|-------------|-------------|----|-------------|-------------|-------------|
| H             | 4.03121300  | 4.24174500  | 1.14717900  | C  | 4.35939500  | 0.26677500  | 0.06188000  |
| H             | 2.38920200  | 5.93592400  | 0.34336200  | C  | 2.88927800  | -1.66316800 | -0.01822900 |
| H             | 0.00058000  | 5.29026000  | 0.06565000  | C  | 5.43175800  | -0.53431500 | -0.31520600 |
| C             | 0.79689000  | 0.88152100  | 1.37891000  | H  | 4.51994900  | 1.32378500  | 0.24516000  |
| O             | -1.19727800 | -1.57905200 | 1.39607000  | C  | 3.96810200  | -2.46340100 | -0.38293800 |
| C             | -2.09023800 | -2.46257100 | 1.18250800  | H  | 1.90437200  | -2.09150300 | 0.10860000  |
| O             | -2.91647600 | -2.47157800 | 0.21553700  | C  | 5.23773700  | -1.90111600 | -0.53784700 |
| C             | -2.14357200 | -3.61677900 | 2.15160500  | H  | 6.41973000  | -0.09755900 | -0.42563300 |
| H             | -1.81251800 | -3.30027700 | 3.14341600  | H  | 3.81892700  | -3.52608800 | -0.55007300 |
| H             | -3.15335300 | -4.03079000 | 2.19973600  | H  | 6.07740400  | -2.52693100 | -0.82681600 |
| H             | -1.46532000 | -4.40345900 | 1.79833000  | N  | 1.84506800  | 0.33418300  | 2.34156300  |
| Rh            | -2.81469200 | -0.97622200 | -1.20246400 | N  | 1.53056900  | -0.19640700 | 3.26410300  |
| Rh            | -0.97933200 | -0.00185100 | 0.09112800  | H  | 1.27565500  | 4.17673400  | -0.72683600 |
| C             | -3.63910100 | 0.94781300  | 0.80769200  | Rh | -2.42889700 | -0.51049100 | -0.46386200 |
| O             | -4.11339100 | 0.16719100  | -0.07757300 | C  | -1.07055100 | -2.49257900 | 1.18153900  |
| O             | -2.40711900 | 1.09221000  | 1.09989800  | C  | -0.94941300 | -3.75129800 | 2.00068000  |
| C             | -4.61547200 | 1.81452700  | 1.56287200  | O  | -2.17362100 | -2.26472500 | 0.59987500  |
| H             | -4.74046300 | 2.75902100  | 1.01888400  | O  | 0.43445400  | -0.88755700 | -1.63796900 |
| H             | -5.59044400 | 1.32649200  | 1.63128100  | C  | 0.04582300  | -2.10042400 | -3.63171000 |
| H             | -4.23226500 | 2.04314300  | 2.56005200  | C  | -0.45530900 | -1.41391300 | -2.38648000 |
| O             | -1.40429900 | -2.06477600 | -2.25223000 | O  | -1.70647500 | -1.42445500 | -2.16524700 |
| O             | 0.29135500  | -1.18773100 | -1.02890400 | O  | -0.04117100 | -1.73304300 | 1.15458700  |
| C             | -0.17710700 | -1.93674900 | -1.94999400 | O  | -2.53241500 | 1.28503100  | -1.47779300 |
| C             | 0.83275400  | -2.71763500 | -2.75215800 | O  | -0.86316100 | 0.94420800  | 1.81811100  |
| H             | 1.50622800  | -3.25536100 | -2.07852200 | O  | -3.00755700 | 0.45120600  | 1.26911400  |
| H             | 0.33659900  | -3.41933800 | -3.42492400 | C  | -2.59420300 | 1.71054700  | 3.24437700  |
| H             | 1.43833900  | -2.01843800 | -3.34040200 | C  | -2.12394400 | 0.96915600  | 2.01999800  |
| O             | -0.88943000 | 1.46096800  | -1.37438800 | O  | -0.39686700 | 1.81013500  | -0.92400900 |
| O             | -2.60763000 | 0.57064200  | -2.55586200 | C  | -1.51711100 | 2.04762400  | -1.48650400 |
| C             | -1.69111500 | 1.43016300  | -2.36505400 | C  | -1.63565300 | 3.37009700  | -2.20118200 |
| C             | -1.49725700 | 2.49374800  | -3.41644100 | Rh | -0.11813700 | 0.05120200  | 0.11940100  |
| H             | -2.43375700 | 2.69494000  | -3.94170100 | H  | 0.57385800  | -3.01779900 | -3.34609000 |
| H             | -1.10656100 | 3.40935300  | -2.96602700 | H  | -0.78209100 | -2.35489900 | -4.29584500 |
| H             | -0.76407600 | 2.13117000  | -4.14785600 | H  | 0.76102300  | -1.45510100 | -4.15030500 |
|               |             |             |             | H  | -1.76457500 | -4.44035700 | 1.77251100  |
|               |             |             |             | H  | -0.99257000 | -3.48674300 | 3.06400700  |
| <b>Ac-TS1</b> |             |             |             | H  | 0.01576800  | -4.23213500 | 1.81676300  |
| C             | 1.91819500  | 0.55299700  | 0.59603400  | H  | -1.84067900 | 1.66566700  | 4.03402300  |
| C             | 2.05676300  | 2.04419900  | 0.54636600  | H  | -3.54426200 | 1.30369300  | 3.59787800  |
| O             | 1.82823800  | 2.81818500  | 1.45632100  | H  | -2.74716600 | 2.76376000  | 2.97791600  |
| O             | 2.38247300  | 2.40869600  | -0.70181700 | H  | -1.78463300 | 4.16261500  | -1.45788800 |
| C             | 2.27195500  | 3.81604900  | -0.98792400 | H  | -2.48565800 | 3.36495700  | -2.88636000 |
| H             | 2.44516100  | 3.90699700  | -2.06007900 | H  | -0.71292400 | 3.58839500  | -2.74571800 |
| H             | 3.02860000  | 4.37635800  | -0.43200000 |    |             |             |             |
| C             | 3.06884600  | -0.28419100 | 0.20022700  |    |             |             |             |



**Ac-TS2**

|   |             |             |             |              |             |             |             |
|---|-------------|-------------|-------------|--------------|-------------|-------------|-------------|
|   |             |             | C           | -0.49848600  | -0.86003200 | 0.78937600  |             |
| H | -1.32750700 | 1.23234700  | -1.06977300 | O            | 1.82601400  | 0.43992300  | 1.97274800  |
| C | -5.13655300 | -0.36252800 | 0.37977700  | C            | 2.97541500  | 0.95932000  | 2.17232500  |
| C | -6.01483600 | -1.44037000 | 0.49374800  | O            | 3.87597600  | 1.13793800  | 1.29742100  |
| C | -5.93090400 | -2.51053300 | -0.40008800 | C            | 3.25722300  | 1.41622300  | 3.58167500  |
| C | -4.95466800 | -2.50619300 | -1.40038500 | H            | 2.89025600  | 0.67690700  | 4.29904700  |
| C | -4.06548800 | -1.44017000 | -1.50384700 | H            | 4.32591800  | 1.58542300  | 3.72657400  |
| C | -4.15156400 | -0.35325400 | -0.62045700 | H            | 2.72214500  | 2.35614700  | 3.76326300  |
| C | -3.16056900 | 0.75311500  | -0.72291600 | Rh           | 3.49452300  | 0.60684400  | -0.66252400 |
| C | -3.60097700 | 2.15495000  | -0.47537900 | Rh           | 1.27174900  | -0.17296800 | 0.07614400  |
| C | -2.69570900 | 3.09432200  | 0.04758300  | C            | 3.38995900  | -2.18134400 | 0.15397200  |
| C | -3.07930500 | 4.42252400  | 0.21718500  | O            | 4.19057500  | -1.30246400 | -0.28618900 |
| C | -4.36734000 | 4.83518200  | -0.13719800 | O            | 2.14453700  | -2.01375800 | 0.39178400  |
| C | -5.27320000 | 3.90895300  | -0.65772800 | C            | 3.93537600  | -3.55589700 | 0.44836500  |
| C | -4.89518200 | 2.57616200  | -0.82093100 | H            | 3.30129800  | -4.31674500 | -0.01727600 |
| N | -1.95709700 | 0.42813400  | -1.03844200 | H            | 4.96130000  | -3.65138100 | 0.08828000  |
| H | -5.20195500 | 0.46764500  | 1.07597800  | H            | 3.91364500  | -3.72475100 | 1.53114200  |
| H | -6.76626900 | -1.44258500 | 1.27852200  | O            | 2.65009400  | 2.46559000  | -0.98893900 |
| H | -4.88253800 | -3.33781500 | -2.09558900 | O            | 0.60768600  | 1.74860000  | -0.31207400 |
| H | -3.29590600 | -1.43154900 | -2.26785400 | C            | 1.41916900  | 2.63882900  | -0.74294400 |
| H | -1.70737100 | 2.76615600  | 0.34668500  | C            | 0.84395600  | 4.01837600  | -0.94259400 |
| H | -2.37458300 | 5.13682200  | 0.63396300  | H            | 0.71633500  | 4.49261500  | 0.03796500  |
| H | -6.27423800 | 4.22303300  | -0.93994900 | H            | 1.51453400  | 4.63154800  | -1.54768900 |
| H | -5.60099800 | 1.86261300  | -1.23340300 | H            | -0.14058200 | 3.95677500  | -1.41360600 |
| H | -4.66323200 | 5.87229000  | -0.00507500 | O            | 0.92766100  | -0.68119600 | -1.89419700 |
| H | -6.62342700 | -3.34380000 | -0.31773900 | O            | 2.97401600  | 0.02659600  | -2.57581100 |
| C | -0.92400200 | -0.10100200 | 1.99884600  | C            | 1.83016500  | -0.48295000 | -2.77733300 |
| O | -0.52130300 | -0.75793900 | 3.10443000  | C            | 1.47467500  | -0.89729900 | -4.18297200 |
| O | -1.47384700 | 0.98280900  | 2.01659300  | H            | 2.30102400  | -0.69842100 | -4.86753900 |
| C | -0.58284900 | -0.00674900 | 4.33169900  | H            | 1.22946600  | -1.96466200 | -4.19882700 |
| H | -0.04406300 | 0.93689700  | 4.22350700  | H            | 0.58386300  | -0.34955800 | -4.50853800 |
| H | -0.10497700 | -0.63692600 | 5.08200900  |              |             |             |             |
| H | -1.62204300 | 0.19067800  | 4.60847500  |              |             |             |             |
| C | -0.71409700 | -2.93945800 | -0.53166300 | <b>B-IM1</b> |             |             |             |
| C | -1.16687100 | -2.09423800 | 0.51346200  | H            | -0.44055300 | -2.03405800 | -0.26128100 |
| C | -2.28293900 | -2.51381500 | 1.28651400  | C            | 1.23628200  | -1.03405700 | -0.06647600 |
| C | -2.89175500 | -3.73597600 | 1.04752200  | C            | 1.77859900  | -2.34040300 | -0.35397400 |
| C | -2.41533600 | -4.56080200 | 0.02266300  | O            | 1.08134700  | -3.31430500 | -0.66967900 |
| C | -1.33263600 | -4.15821700 | -0.76857300 | O            | 3.12372500  | -2.42896000 | -0.21559600 |
| H | 0.11396200  | -2.60949300 | -1.14321100 | C            | 3.68370800  | -3.72538300 | -0.46208800 |
| H | -2.66468000 | -1.87223000 | 2.07246200  | H            | 3.46720200  | -4.05888400 | -1.48120600 |
| H | -3.74399400 | -4.04344300 | 1.64438400  | H            | 3.29284100  | -4.46170300 | 0.24631700  |
| H | -2.89609100 | -5.51673000 | -0.16580200 | N            | -0.13454300 | -1.06160200 | -0.14029500 |
| H | -0.97712500 | -4.80074500 | -1.56855100 | C            | -1.11584300 | -0.15480900 | -0.14974500 |
|   |             |             |             | C            | 1.99674500  | 0.11988800  | 0.41462900  |

|   |             |             |             |   |             |             |             |
|---|-------------|-------------|-------------|---|-------------|-------------|-------------|
| C | 3.20326500  | 0.50618900  | -0.19853000 | C | -1.28159700 | 0.74451800  | 0.56743600  |
| C | 1.52984000  | 0.88932200  | 1.49823300  | C | -3.55021700 | -0.33604100 | -0.69200400 |
| C | 3.90849500  | 1.62062900  | 0.24995500  | H | -2.26126400 | -1.97385800 | -1.25917800 |
| H | 3.57802300  | -0.06924700 | -1.03763500 | C | -2.48761600 | 1.42126600  | 0.62816300  |
| C | 2.23295500  | 2.00539700  | 1.94094800  | H | -0.40037900 | 1.15009700  | 1.05546500  |
| H | 0.60780500  | 0.60686900  | 1.99569800  | C | -3.61743600 | 0.88204600  | -0.00549700 |
| C | 3.42473400  | 2.38148800  | 1.31656600  | H | -4.43586600 | -0.73686000 | -1.17482300 |
| H | 4.83391300  | 1.90319500  | -0.24520400 | H | -2.56315700 | 2.36660100  | 1.15657400  |
| H | 1.84762800  | 2.58435100  | 2.77590100  | H | -4.56070800 | 1.41933100  | 0.03954900  |
| H | 3.96975100  | 3.25722300  | 1.65780200  | H | 3.89326600  | 0.74724300  | -0.67068800 |
| C | -2.47823400 | -0.67340000 | 0.00620100  |   |             |             |             |
| C | -2.72844300 | -1.85866600 | 0.72928700  |   |             |             |             |
| C | -3.57272500 | -0.01384600 | -0.59025700 |   |             |             |             |
| C | -4.01828100 | -2.37494800 | 0.82850600  |   |             |             |             |
| H | -1.91435800 | -2.35870300 | 1.24687800  |   |             |             |             |
| C | -4.86021800 | -0.52787500 | -0.47670300 |   |             |             |             |
| H | -3.40221600 | 0.89363200  | -1.15935500 |   |             |             |             |
| C | -5.09092400 | -1.71336800 | 0.22790400  |   |             |             |             |
| H | -4.18699500 | -3.28711100 | 1.39402000  |   |             |             |             |
| H | -5.68743500 | -0.00718000 | -0.95104300 |   |             |             |             |
| C | -0.85286900 | 1.27660400  | -0.33530300 |   |             |             |             |
| C | -1.55030400 | 2.23242700  | 0.42529000  |   |             |             |             |
| C | 0.09513600  | 1.72488900  | -1.27321700 |   |             |             |             |
| C | -1.29351500 | 3.59185000  | 0.26600700  |   |             |             |             |
| H | -2.28221100 | 1.90184300  | 1.15525100  |   |             |             |             |
| C | 0.34341200  | 3.08392800  | -1.43613500 |   |             |             |             |
| H | 0.63421700  | 1.00304300  | -1.87634100 |   |             |             |             |
| C | -0.34325500 | 4.02287800  | -0.66233800 |   |             |             |             |
| H | -1.83151400 | 4.31506500  | 0.87239600  |   |             |             |             |
| H | 1.08011600  | 3.41063700  | -2.16431600 |   |             |             |             |
| H | -0.13930700 | 5.08308800  | -0.78279100 |   |             |             |             |
| H | 4.75986500  | -3.60749100 | -0.32495500 |   |             |             |             |
| H | -6.09768000 | -2.11181300 | 0.31406700  |   |             |             |             |

**B-IM1-t**

|   |             |             |             |
|---|-------------|-------------|-------------|
| C | -0.54001000 | -0.99612900 | 0.05724800  |
| C | -1.92439400 | -0.62246200 | 0.05310700  |
| O | -2.84578100 | -1.43049800 | 0.05418600  |
| O | -2.11372100 | 0.72342900  | 0.04994400  |
| C | -3.48759100 | 1.15452600  | 0.04078400  |
| H | -4.00392200 | 0.81254500  | 0.94203700  |
| H | -4.00584300 | 0.77102900  | -0.84225400 |
| C | 0.74507600  | -0.43950900 | 0.03292700  |
| C | 1.88071200  | -1.29736500 | 0.08576800  |
| C | 0.96448300  | 0.96857800  | -0.04918100 |
| C | 3.16376700  | -0.77347300 | 0.06018800  |
| H | 1.72223800  | -2.36932800 | 0.14730200  |
| C | 2.25630000  | 1.47195700  | -0.07439100 |
| H | 0.10877600  | 1.63157400  | -0.09117300 |
| C | 3.36046100  | 0.61124600  | -0.01999100 |
| H | 4.01866300  | -1.44208800 | 0.10226300  |
| H | 2.41005500  | 2.54554500  | -0.13707200 |
| H | 4.36735500  | 1.01731800  | -0.04018600 |
| H | -3.44896400 | 2.24427000  | 0.01578000  |

**B-IM2-s**

|   |             |             |             |
|---|-------------|-------------|-------------|
| H | -0.05687900 | -1.87963400 | -2.98616900 |
| N | -0.85548400 | -1.72553300 | -2.36214600 |
| C | -0.44560500 | -1.62532900 | -1.14607300 |
| C | 0.99800200  | -1.66657900 | -0.77052400 |
| C | 1.93430900  | -0.97838200 | -1.55597100 |
| C | 1.44643200  | -2.39420300 | 0.34230300  |
| C | 3.28856000  | -1.00307800 | -1.22761800 |
| H | 1.59268800  | -0.38313800 | -2.39573400 |
| C | 2.80310300  | -2.43307200 | 0.65917800  |
| H | 0.73156100  | -2.93643200 | 0.95309900  |
| C | 3.72681200  | -1.73127700 | -0.12085300 |

**B-IM1-s**

|   |             |             |             |
|---|-------------|-------------|-------------|
| C | 0.02562200  | -1.23788400 | -0.24716500 |
| C | 1.22550200  | -0.76007600 | 0.37999600  |
| O | 1.49087600  | -1.07711200 | 1.53918400  |
| O | 2.05955000  | -0.07722500 | -0.43237300 |
| C | 3.34370400  | 0.25292800  | 0.13118600  |
| H | 3.87169100  | -0.64962100 | 0.45049000  |
| H | 3.23228200  | 0.92854000  | 0.98394300  |
| C | -1.17866500 | -0.50056400 | -0.12040300 |
| C | -2.34658600 | -1.02378000 | -0.74177300 |

|   |             |             |             |   |             |             |             |
|---|-------------|-------------|-------------|---|-------------|-------------|-------------|
| H | 3.99846200  | -0.44404500 | -1.83041400 | C | -1.05255100 | -1.06398400 | -0.75836100 |
| H | 3.14018400  | -3.00966400 | 1.51619300  | C | 2.44406000  | -1.44388800 | 0.70222900  |
| C | -1.46153800 | -1.42983800 | -0.07330600 | C | 2.97342500  | -2.48413000 | -0.11057700 |
| C | -1.13082900 | -0.83140700 | 1.15238600  | C | 3.06501100  | -0.16237800 | 0.65336500  |
| C | -2.79435300 | -1.80475400 | -0.30579400 | C | 4.07273800  | -2.25351600 | -0.92320500 |
| C | -2.10736800 | -0.63015300 | 2.12809500  | H | 2.49143700  | -3.45596500 | -0.09097800 |
| H | -0.11713000 | -0.49002900 | 1.32766100  | C | 4.16352200  | 0.04817500  | -0.16594100 |
| C | -3.76798200 | -1.60215900 | 0.66818500  | H | 2.65884200  | 0.64121500  | 1.25509700  |
| H | -3.04870800 | -2.25841100 | -1.25746900 | C | 4.67656300  | -0.98990700 | -0.95371100 |
| C | -3.42637200 | -1.01803200 | 1.89177000  | H | 4.46259200  | -3.05721400 | -1.54136500 |
| H | -1.83655600 | -0.15983600 | 3.06938200  | H | 4.62379600  | 1.03160100  | -0.19941600 |
| H | -4.79401900 | -1.90427900 | 0.47675800  | H | 5.53749100  | -0.81341500 | -1.59194400 |
| C | 0.63795200  | 1.98200600  | -1.17405400 | C | -2.37526500 | -0.53448300 | -0.31092200 |
| C | 1.34552400  | 2.31706800  | 0.02993000  | C | -2.93863100 | -0.98825000 | 0.89243000  |
| O | 1.70886300  | 3.46921300  | 0.26154100  | C | -3.09393000 | 0.38031100  | -1.09607500 |
| O | 1.67700500  | 1.25188400  | 0.79643900  | C | -4.19085000 | -0.53287800 | 1.30243900  |
| C | 2.63463400  | 1.49738500  | 1.84052900  | H | -2.37675200 | -1.66873200 | 1.52416400  |
| H | 2.81111800  | 0.52597700  | 2.30283000  | C | -4.35390000 | 0.82056200  | -0.69265800 |
| H | 2.23878600  | 2.20135400  | 2.57784900  | H | -2.66906600 | 0.73540400  | -2.02961400 |
| C | -0.77400400 | 1.91794500  | -1.18598000 | C | -4.90374600 | 0.36901900  | 0.50912700  |
| C | -1.40940800 | 1.48922800  | -2.38519400 | H | -4.60652100 | -0.87965200 | 2.24431600  |
| C | -1.59436200 | 2.18910000  | -0.05009200 | H | -4.90592400 | 1.51790500  | -1.31656300 |
| C | -2.78199100 | 1.30479800  | -2.43747000 | C | -0.07349300 | -0.12657200 | -1.37340100 |
| H | -0.78397200 | 1.28782200  | -3.24786800 | C | -0.05047100 | 1.23399900  | -1.03281000 |
| C | -2.96723300 | 2.03854000  | -0.11670600 | C | 0.88758400  | -0.61832200 | -2.27034100 |
| H | -1.12405000 | 2.52016000  | 0.87059100  | C | 0.90980100  | 2.08382500  | -1.58085600 |
| C | -3.55557700 | 1.57952200  | -1.30478100 | H | -0.77319400 | 1.62401700  | -0.32490900 |
| H | -3.25484400 | 0.94442800  | -3.34516700 | C | 1.83745700  | 0.23245000  | -2.82615700 |
| H | -3.58648900 | 2.24132800  | 0.75081900  | H | 0.87438000  | -1.67299000 | -2.52122000 |
| H | -4.63150200 | 1.43420700  | -1.34417800 | C | 1.85172900  | 1.58727100  | -2.48259300 |
| H | 3.56644400  | 1.89135000  | 1.42539900  | H | 0.92237300  | 3.13350000  | -1.30080700 |
| H | 4.78231400  | -1.75152900 | 0.13622100  | H | 2.57280900  | -0.16104300 | -3.52165400 |
| H | -4.18633300 | -0.86472000 | 2.65326700  | H | -5.88099400 | 0.72105800  | 0.82755100  |
|   |             |             |             | H | 2.59665700  | 2.25064600  | -2.91357000 |
|   |             |             |             | H | -0.37316900 | 2.12265500  | 2.66182500  |

**B-IM2-t**

|   |             |             |             |
|---|-------------|-------------|-------------|
| H | -1.47715100 | -2.83429300 | -0.20813600 |
| C | 1.34515000  | -1.70513400 | 1.53037300  |
| C | 0.36691800  | -1.02098300 | 2.31835800  |
| O | -0.42576000 | -1.58173500 | 3.06973800  |
| O | 0.38751800  | 0.32585500  | 2.13340000  |
| C | -0.57724600 | 1.07619800  | 2.89189600  |
| H | -0.45434900 | 0.89257900  | 3.96267900  |
| H | -1.59388500 | 0.81282300  | 2.58993700  |
| N | -0.71022300 | -2.29804600 | -0.62597100 |

**B-TS1**

|   |             |             |             |
|---|-------------|-------------|-------------|
| H | 0.38921600  | -2.20749600 | 0.00381000  |
| N | -0.02753200 | -1.32627900 | -0.30460900 |
| C | 0.83285000  | -0.36845400 | -0.61688000 |
| C | 0.23593900  | 0.89758400  | -1.04811700 |
| C | -1.01698600 | 0.87506500  | -1.69107700 |
| C | 0.81378600  | 2.14053100  | -0.72441800 |
| C | -1.68640900 | 2.06186100  | -1.97741500 |

|                |             |             |             |                |             |             |             |
|----------------|-------------|-------------|-------------|----------------|-------------|-------------|-------------|
| H              | -1.44040400 | -0.08031800 | -1.98050600 | O              | -1.68077700 | -1.03743300 | 0.17480900  |
| C              | 0.14057100  | 3.32124400  | -1.01130700 | C              | -3.00357400 | -1.48706700 | -0.16922000 |
| H              | 1.76049700  | 2.16983600  | -0.19716100 | H              | -3.08776700 | -2.48943200 | 0.25245500  |
| C              | -1.11484700 | 3.28640000  | -1.63005100 | H              | -3.13051000 | -1.52123000 | -1.25478800 |
| H              | -2.65537000 | 2.02972400  | -2.46704000 | C              | 1.11404400  | 0.00854700  | 0.21727800  |
| H              | 0.58190200  | 4.27319100  | -0.73090700 | C              | 2.21380300  | 0.37747900  | 1.02739900  |
| C              | 2.28283300  | -0.57653400 | -0.53444900 | C              | 1.30743000  | -0.98249300 | -0.77555700 |
| C              | 2.83399500  | -1.51113600 | 0.36679700  | C              | 3.45827500  | -0.21261400 | 0.84921600  |
| C              | 3.15908400  | 0.13220800  | -1.38104600 | H              | 2.06076400  | 1.13458200  | 1.79046200  |
| C              | 4.20829300  | -1.70945500 | 0.43285800  | C              | 2.54492500  | -1.59367200 | -0.93116200 |
| H              | 2.18532500  | -2.06705100 | 1.03818200  | H              | 0.47231000  | -1.27487900 | -1.40367400 |
| C              | 4.53372000  | -0.07738900 | -1.31712700 | C              | 3.62115400  | -1.20229500 | -0.12659800 |
| H              | 2.75431800  | 0.83458500  | -2.10140300 | H              | 4.29822100  | 0.08208500  | 1.47089500  |
| C              | 5.06654700  | -0.99505700 | -0.40898800 | H              | 2.68244500  | -2.36241100 | -1.68571500 |
| H              | 4.61313400  | -2.42201900 | 1.14579600  | H              | 4.59141300  | -1.67282500 | -0.25949100 |
| H              | 5.19085500  | 0.47497800  | -1.98283100 | N              | 0.00589900  | 2.45537200  | -0.28208800 |
| C              | -1.33550500 | -0.98838300 | 0.89105300  | N              | 0.13039500  | 3.53820000  | -0.06628000 |
| C              | -2.60040000 | -1.18660400 | 0.15048300  | H              | -3.76273000 | -0.82944700 | 0.26332700  |
| O              | -3.62648500 | -0.53996100 | 0.30646000  |                |             |             |             |
| O              | -2.53147900 | -2.29072700 | -0.62299500 |                |             |             |             |
| C              | -3.76126900 | -2.67002300 | -1.26434100 | <b>B-TS1-t</b> |             |             |             |
| H              | -4.10430400 | -1.88152200 | -1.93955500 | C              | 0.08954900  | 0.76290000  | 0.03014500  |
| H              | -4.53563500 | -2.87321800 | -0.51977800 | C              | 1.48314800  | 0.42894800  | 0.24514900  |
| C              | -1.01518600 | 0.25157900  | 1.62071900  | O              | 2.34544600  | 1.24605200  | 0.53317800  |
| C              | 0.22982400  | 0.33504200  | 2.27239100  | O              | 1.73715200  | -0.89115500 | 0.07136000  |
| C              | -1.86666500 | 1.37155700  | 1.64689500  | C              | 3.10397500  | -1.28758300 | 0.29376300  |
| C              | 0.60982700  | 1.49864400  | 2.93826500  | H              | 3.12166200  | -2.36563600 | 0.13159400  |
| H              | 0.90634100  | -0.51209200 | 2.24920600  | H              | 3.41246200  | -1.05063600 | 1.31554600  |
| C              | -1.47235300 | 2.53228000  | 2.30318900  | C              | -1.11981000 | 0.03717400  | -0.00387000 |
| H              | -2.82172300 | 1.32568200  | 1.14394300  | C              | -2.31424700 | 0.61874800  | -0.51513200 |
| C              | -0.23505700 | 2.60747500  | 2.95131100  | C              | -1.18762600 | -1.29651000 | 0.49909500  |
| H              | 1.57699400  | 1.53912800  | 3.43181600  | C              | -3.50171200 | -0.09654300 | -0.52494300 |
| H              | -2.13806900 | 3.39103300  | 2.30146000  | H              | -2.29116400 | 1.62382600  | -0.91799500 |
| H              | 0.06555600  | 3.52175700  | 3.45513000  | C              | -2.38556000 | -1.99349700 | 0.48575500  |
| N              | -0.97155700 | -2.15712400 | 1.72445000  | H              | -0.29089400 | -1.75665500 | 0.89376100  |
| N              | -1.43817400 | -2.91686200 | 2.47862500  | C              | -3.54852800 | -1.40280200 | -0.02370500 |
| H              | -3.52806000 | -3.57429300 | -1.82742200 | H              | -4.39927100 | 0.36349300  | -0.92757900 |
| H              | 6.13937900  | -1.15671500 | -0.35980800 | H              | -2.41763400 | -3.00627600 | 0.87710100  |
| H              | -1.64128200 | 4.21256700  | -1.84258800 | H              | -4.48280700 | -1.95608300 | -0.03108000 |
|                |             |             |             | N              | -0.79270100 | 3.22493400  | 0.32871200  |
|                |             |             |             | N              | 0.04907400  | 2.61732800  | -0.13344900 |
|                |             |             |             | H              | 3.76884400  | -0.78462800 | -0.41331000 |
| <b>B-TS1-s</b> |             |             |             |                |             |             |             |
| C              | -0.15927800 | 0.63501000  | 0.46977000  |                |             |             |             |
| C              | -1.38286700 | 0.23665400  | -0.21175300 | <b>B-TS2</b>   |             |             |             |
| O              | -2.13063100 | 0.92126900  | -0.89429600 | H              | 0.20578000  | -1.75669300 | 0.83651500  |

|   |             |             |             |                |             |             |             |
|---|-------------|-------------|-------------|----------------|-------------|-------------|-------------|
| C | 1.17405200  | -1.18027600 | 0.05051100  | <b>B-TS2-s</b> |             |             |             |
| C | 1.78508900  | -2.44018900 | -0.41572400 | H              | -0.52605600 | -1.10966900 | -1.50242800 |
| O | 1.19981400  | -3.36789900 | -0.95401200 | C              | 2.25735200  | 0.04109600  | 0.52145800  |
| O | 3.10998200  | -2.48318400 | -0.11949600 | C              | 3.23282700  | 0.57527200  | -0.39200900 |
| C | 3.78150000  | -3.69042500 | -0.50542000 | O              | 2.96987300  | 1.17176300  | -1.43234400 |
| H | 3.70643000  | -3.85243100 | -1.58463700 | O              | 4.49182300  | 0.47447400  | 0.11478600  |
| H | 3.35887200  | -4.55399500 | 0.01630000  | C              | 5.50154600  | 1.22032300  | -0.58857900 |
| N | -0.25348500 | -1.19695800 | -0.12344300 | H              | 5.25038300  | 2.28456800  | -0.61657500 |
| C | -1.14702800 | -0.23063000 | -0.11071500 | H              | 5.62132400  | 0.85017300  | -1.61052200 |
| C | 1.97525200  | 0.02897400  | 0.34043500  | N              | -0.28033100 | -0.18012000 | -1.14742700 |
| C | 3.04488500  | 0.41612200  | -0.48338200 | C              | -1.30039400 | 0.38230700  | -0.60403200 |
| C | 1.64226900  | 0.84640500  | 1.43252700  | C              | 1.95424500  | -1.34590600 | 0.54684700  |
| C | 3.74547100  | 1.59418300  | -0.23247000 | C              | 1.01352400  | -1.79955400 | 1.50989800  |
| H | 3.31788300  | -0.20412100 | -1.33022200 | C              | 2.53325000  | -2.30218400 | -0.33288100 |
| C | 2.33692800  | 2.02657900  | 1.67925200  | C              | 0.67055400  | -3.14151200 | 1.59520400  |
| H | 0.82485800  | 0.55665300  | 2.08560500  | H              | 0.56857600  | -1.06107400 | 2.16867700  |
| C | 3.38898300  | 2.40878600  | 0.84393900  | C              | 2.18372200  | -3.64106200 | -0.25186400 |
| H | 4.56470400  | 1.88206200  | -0.88580000 | H              | 3.24802500  | -1.96622500 | -1.07793000 |
| H | 2.05475400  | 2.64967000  | 2.52308900  | C              | 1.25426100  | -4.05800700 | 0.71149900  |
| H | 3.92857700  | 3.33242100  | 1.03378600  | H              | -0.04659100 | -3.48157700 | 2.33591100  |
| C | -2.55400100 | -0.64034600 | 0.07451200  | H              | 2.62443400  | -4.36668900 | -0.92869100 |
| C | -2.87283100 | -1.90437400 | 0.60927300  | H              | 0.98328600  | -5.10853500 | 0.77251900  |
| C | -3.61472700 | 0.20808600  | -0.29703200 | C              | -2.62810200 | -0.29703500 | -0.50655500 |
| C | -4.19670700 | -2.29829300 | 0.77240100  | C              | -2.68923300 | -1.64464700 | -0.11992300 |
| H | -2.07146600 | -2.57774300 | 0.89312500  | C              | -3.81563100 | 0.36574300  | -0.85186900 |
| C | -4.94002600 | -0.18870600 | -0.12948300 | C              | -3.91098600 | -2.31413600 | -0.07614700 |
| H | -3.39989100 | 1.17652700  | -0.73427700 | H              | -1.77538500 | -2.15989600 | 0.16299600  |
| C | -5.23959500 | -1.44143600 | 0.40793900  | C              | -5.03525300 | -0.30930600 | -0.82112800 |
| H | -4.41700300 | -3.27701400 | 1.18995200  | H              | -3.77899000 | 1.40588100  | -1.16001800 |
| H | -5.74053500 | 0.48239600  | -0.42859100 | C              | -5.08715200 | -1.64868000 | -0.42899000 |
| C | -0.81505700 | 1.19983800  | -0.30774200 | H              | -3.94554400 | -3.35401300 | 0.23686700  |
| C | -1.31596900 | 2.17838500  | 0.56668800  | H              | -5.94577100 | 0.21207600  | -1.10293100 |
| C | 0.03385100  | 1.59755100  | -1.35203500 | C              | -1.13049500 | 1.75092400  | -0.04255000 |
| C | -0.95098500 | 3.51483200  | 0.41943000  | C              | -2.01737500 | 2.27532200  | 0.90990800  |
| H | -1.97224200 | 1.88237300  | 1.37926200  | C              | -0.01912200 | 2.51893900  | -0.43216400 |
| C | 0.39303700  | 2.93439300  | -1.50265700 | C              | -1.80653200 | 3.54330000  | 1.45278500  |
| H | 0.41436100  | 0.85222400  | -2.04258100 | H              | -2.86577800 | 1.68732800  | 1.24257600  |
| C | -0.09093400 | 3.89574500  | -0.61270000 | C              | 0.18544400  | 3.78475100  | 0.10781000  |
| H | -1.33184200 | 4.25755400  | 1.11493300  | H              | 0.68448900  | 2.10198900  | -1.14404900 |
| H | 1.05838000  | 3.22472900  | -2.31050100 | C              | -0.70840400 | 4.30355400  | 1.04994400  |
| H | -6.27303800 | -1.74924100 | 0.53996700  | H              | -2.49927900 | 3.93276400  | 2.19370500  |
| H | 0.19787600  | 4.93690700  | -0.72569000 | H              | 1.04808500  | 4.36764500  | -0.20326400 |
| H | 4.82404100  | -3.54970200 | -0.21639000 | H              | -0.54617100 | 5.29248000  | 1.47026600  |
|   |             |             |             | H              | -6.03941300 | -2.17067400 | -0.39760100 |

|                |             |             |             |                |             |             |             |
|----------------|-------------|-------------|-------------|----------------|-------------|-------------|-------------|
| H              | 6.42226400  | 1.06689900  | -0.02381800 | H              | -1.91714600 | -2.60866800 | 2.31916600  |
|                |             |             |             | H              | -1.22177400 | -4.18410600 | -1.46912400 |
|                |             |             |             | H              | 6.37789900  | 1.12634300  | 0.44642000  |
| <b>B-TS2-t</b> |             |             |             |                |             |             |             |
| H              | 0.91391400  | 2.46150400  | -0.57654900 |                |             |             |             |
| C              | -1.34199100 | 1.39669000  | 0.72217000  | <b>B-TS2-w</b> |             |             |             |
| C              | -0.86711200 | 0.38101800  | 1.61477600  | H              | 0.60414700  | -2.19338100 | -0.27998700 |
| O              | 0.19633400  | 0.43844400  | 2.22747100  | C              | -1.17608200 | -1.25084600 | -0.39844400 |
| O              | -1.68543900 | -0.70766100 | 1.67158400  | C              | -2.07550100 | -1.58455300 | 0.72481100  |
| C              | -1.20055300 | -1.79968500 | 2.46796600  | O              | -1.71807300 | -1.90672500 | 1.84943800  |
| H              | -1.15735500 | -1.52101500 | 3.52538500  | O              | -3.37142800 | -1.59875900 | 0.33633700  |
| H              | -0.20723700 | -2.10861300 | 2.13437000  | C              | -4.31405600 | -2.00822900 | 1.33932400  |
| N              | 0.40167800  | 1.60933900  | -0.81819600 | H              | -5.29574300 | -1.90954400 | 0.87408500  |
| C              | 1.17580600  | 0.57275000  | -0.78323900 | H              | -4.24670400 | -1.36741400 | 2.22276000  |
| C              | -2.58889600 | 1.79140100  | 0.20509700  | N              | 0.23634600  | -1.25283900 | 0.03179200  |
| C              | -2.65885600 | 2.65173000  | -0.92524800 | C              | 1.02370300  | -0.26209600 | 0.32453100  |
| C              | -3.81297800 | 1.37766300  | 0.80718700  | C              | -1.49941600 | -0.13440100 | -1.34744800 |
| C              | -3.88452700 | 3.06534400  | -1.42688400 | C              | -2.44983000 | 0.86186000  | -1.08899700 |
| H              | -1.73139300 | 2.96019800  | -1.39371300 | C              | -0.76846700 | -0.06384400 | -2.54480700 |
| C              | -5.03004300 | 1.80123000  | 0.29294100  | C              | -2.65495500 | 1.90232200  | -1.99511600 |
| H              | -3.77878200 | 0.71918000  | 1.66768100  | H              | -3.02434300 | 0.83136700  | -0.17090400 |
| C              | -5.07698800 | 2.64536100  | -0.82389800 | C              | -0.96370100 | 0.98080400  | -3.44542400 |
| H              | -3.91732600 | 3.71665000  | -2.29612400 | H              | -0.03643700 | -0.83756500 | -2.76083700 |
| H              | -5.95320800 | 1.47211400  | 0.76246700  | C              | -1.90986000 | 1.97194700  | -3.17328500 |
| H              | -6.03399900 | 2.97143000  | -1.22090900 | H              | -3.39105700 | 2.66933300  | -1.76935000 |
| C              | 2.61527100  | 0.67684400  | -0.42683200 | H              | -0.38317800 | 1.01699400  | -4.36359100 |
| C              | 2.99807800  | 1.44019500  | 0.68728900  | H              | -2.06533500 | 2.78866900  | -3.87281000 |
| C              | 3.60336000  | 0.06652100  | -1.21443300 | C              | 2.47781000  | -0.47303000 | 0.28743100  |
| C              | 4.34668600  | 1.59522800  | 1.00159100  | C              | 3.03360000  | -1.52728600 | -0.46471000 |
| H              | 2.22823400  | 1.86692300  | 1.32249300  | C              | 3.32884200  | 0.38196600  | 1.00981400  |
| C              | 4.95205500  | 0.23682600  | -0.90531000 | C              | 4.41039600  | -1.71585000 | -0.48552400 |
| H              | 3.31232400  | -0.52778800 | -2.07531600 | H              | 2.39471300  | -2.18809200 | -1.04404500 |
| C              | 5.32666200  | 1.00132200  | 0.20228400  | C              | 4.70627400  | 0.18221200  | 0.98801900  |
| H              | 4.63298200  | 2.17407200  | 1.87523400  | H              | 2.90704400  | 1.18899000  | 1.59780400  |
| H              | 5.71069700  | -0.22749900 | -1.52918400 | C              | 5.24911500  | -0.86439900 | 0.24049600  |
| C              | 0.56926900  | -0.75316900 | -1.04509000 | H              | 4.83217600  | -2.52486000 | -1.07398300 |
| C              | 1.15639800  | -1.92960100 | -0.55205800 | H              | 5.35500800  | 0.84207000  | 1.55588800  |
| C              | -0.67260500 | -0.83541100 | -1.69833100 | C              | 0.46023000  | 1.06081100  | 0.65676100  |
| C              | 0.51399000  | -3.15795500 | -0.70516100 | C              | 0.87417100  | 2.19528900  | -0.05598200 |
| H              | 2.10266200  | -1.87843900 | -0.02485800 | C              | -0.50961100 | 1.17708600  | 1.66294000  |
| C              | -1.31007900 | -2.06177900 | -1.85195100 | C              | 0.29373600  | 3.43210500  | 0.21398500  |
| H              | -1.12840900 | 0.07347600  | -2.07381800 | H              | 1.61901200  | 2.09672800  | -0.83890200 |
| C              | -0.72073600 | -3.22711400 | -1.35249400 | C              | -1.06047300 | 2.42356200  | 1.94923600  |
| H              | 0.97472500  | -4.05884000 | -0.30984400 | H              | -0.81789000 | 0.29430800  | 2.21210900  |
| H              | -2.26988000 | -2.11025800 | -2.35845600 | C              | -0.66921800 | 3.54822200  | 1.21889800  |

|           |             |             |             |   |             |             |             |
|-----------|-------------|-------------|-------------|---|-------------|-------------|-------------|
| H         | 0.59487200  | 4.30477200  | -0.35758200 | N | -1.33025400 | -0.85680900 | 0.38725600  |
| H         | -1.80240800 | 2.51526100  | 2.73701100  | H | -1.06574900 | -1.68449700 | -0.13047000 |
| O         | -0.05658200 | -3.36460300 | -1.34485000 | C | 3.09897900  | 0.36686200  | 1.65955800  |
| H         | -0.97747100 | -2.35361400 | -1.02805100 | H | 4.02935500  | -0.06471400 | 1.26404600  |
| H         | 0.13856100  | -3.17956700 | -2.27819500 | C | 1.51932000  | -1.43016400 | 2.16070800  |
| H         | -4.13874100 | -3.04683600 | 1.63382500  | H | 2.02671900  | -2.35968900 | 1.88326500  |
| H         | 6.32428900  | -1.01708500 | 0.22087200  | H | 0.68407000  | -1.69515000 | 2.81592300  |
| H         | -1.11347000 | 4.51584000  | 1.43404400  | H | 2.42840600  | 2.26410000  | -1.92633000 |
|           |             |             |             | C | 1.06106300  | 2.81336700  | -0.43186000 |
| <b>G1</b> |             |             |             | C | 1.43132300  | 4.29527600  | -0.31797700 |
| C         | -2.75277100 | -0.54664600 | 0.50560800  | C | -0.21257300 | 2.63024600  | -1.27044400 |
| C         | -3.52016600 | -1.83190300 | 0.79115700  | H | 0.86573200  | 2.41755000  | 0.56512900  |
| C         | -4.00040900 | -2.64413100 | -0.24196100 | C | 0.26437100  | 5.11170900  | 0.25597000  |
| C         | -3.70060800 | -2.24144500 | 2.11782900  | H | 1.69491900  | 4.68077700  | -1.31499400 |
| C         | -4.64743400 | -3.84697200 | 0.04666300  | H | 2.32356800  | 4.40352400  | 0.31058300  |
| H         | -3.88045300 | -2.32923800 | -1.27441500 | C | -1.38142100 | 3.43536300  | -0.69177900 |
| C         | -4.35267300 | -3.43955100 | 2.40860200  | H | -0.01275000 | 2.95039200  | -2.30496700 |
| H         | -3.32769100 | -1.61414300 | 2.92376900  | H | -0.47317200 | 1.56863500  | -1.31066600 |
| C         | -4.82664700 | -4.24720800 | 1.37198200  | C | -1.01983700 | 4.92051500  | -0.56283500 |
| H         | -5.01729100 | -4.46768900 | -0.76494400 | H | 0.53583600  | 6.17409800  | 0.29991800  |
| H         | -4.49319800 | -3.74104800 | 3.44304800  | H | 0.08052100  | 4.78985500  | 1.29104000  |
| H         | -5.33759200 | -5.17949700 | 1.59618600  | H | -2.27251100 | 3.30628000  | -1.31680100 |
| C         | -3.29610700 | 0.22266500  | -0.69057000 | H | -1.62713900 | 3.02858600  | 0.29801400  |
| C         | -4.45019900 | 0.99762500  | -0.52531200 | H | -1.84690900 | 5.47619400  | -0.10248800 |
| C         | -2.69750200 | 0.16128400  | -1.95160600 | H | -0.87439000 | 5.34603600  | -1.56713400 |
| C         | -4.99410100 | 1.70163200  | -1.59814200 | C | 3.28697200  | -1.41298100 | -1.32271300 |
| H         | -4.92073300 | 1.04990500  | 0.45354800  | C | 2.48858000  | -2.42181000 | -2.16594400 |
| C         | -3.23985600 | 0.86536300  | -3.02958100 | C | 4.78893400  | -1.55173600 | -1.62699100 |
| H         | -1.79436800 | -0.42449800 | -2.09259000 | H | 3.14981300  | -1.67279100 | -0.26222300 |
| C         | -4.38852400 | 1.63804500  | -2.85630400 | C | 2.96575200  | -3.85995300 | -1.92960800 |
| H         | -5.88588500 | 2.30488500  | -1.45154600 | H | 2.60793900  | -2.15617900 | -3.22546300 |
| H         | -2.75861700 | 0.81297500  | -4.00235700 | H | 1.41829200  | -2.32710900 | -1.93953100 |
| H         | -4.80811000 | 2.18949100  | -3.69309900 | C | 5.28157500  | -2.98564400 | -1.39227600 |
| H         | -2.82847000 | 0.10269100  | 1.38116700  | H | 4.96111100  | -1.26039500 | -2.67245800 |
| C         | 2.51417100  | -0.46572400 | 2.82541500  | H | 5.35130500  | -0.84445300 | -1.00445800 |
| H         | 3.31048800  | -1.03616100 | 3.31204700  | C | 4.46838400  | -4.00002500 | -2.20725800 |
| N         | 2.18869400  | 2.04236400  | -0.96375000 | H | 2.39530100  | -4.55566600 | -2.55801300 |
| N         | 2.84995900  | -0.06067300 | -1.62314700 | H | 2.76277900  | -4.14171000 | -0.88544800 |
| N         | 2.03558200  | 0.32397900  | 0.63513000  | H | 6.34716500  | -3.06310500 | -1.64229300 |
| C         | 2.36574400  | 0.69594800  | -0.70054100 | H | 5.19284900  | -3.22791600 | -0.32273900 |
| C         | 1.04943000  | -0.72252000 | 0.86577200  | H | 4.80272600  | -5.02177900 | -1.98678600 |
| H         | 1.02416100  | -1.43977200 | 0.03800200  | H | 4.65214300  | -3.83091100 | -3.27823500 |
| O         | -0.61823500 | 0.84962300  | 1.71067600  | C | 1.92229000  | 0.56878700  | 3.82817900  |
| C         | -0.36665700 | -0.14464700 | 1.02907800  | H | 0.86234400  | 0.38203500  | 4.02195200  |

|           |             |             |             |           |             |             |             |
|-----------|-------------|-------------|-------------|-----------|-------------|-------------|-------------|
| H         | 2.44927800  | 0.48796600  | 4.78593000  | H         | 5.71362000  | -0.67879600 | -1.66126600 |
| C         | 3.32324200  | 1.76828700  | 2.23919400  | H         | 4.67994500  | -0.90018100 | -3.07278500 |
| H         | 3.39186800  | 2.53218900  | 1.45932700  | C         | -2.93396700 | -0.06782000 | -0.89892100 |
| H         | 4.27357800  | 1.76804000  | 2.79076400  | C         | -3.32742200 | 1.38089300  | -1.23395600 |
| C         | 2.14337400  | 1.96316000  | 3.20257600  | C         | -4.06014700 | -1.02742200 | -1.32313200 |
| H         | 2.33482300  | 2.73828900  | 3.95253900  | H         | -2.83336300 | -0.15230600 | 0.19365000  |
| H         | 1.24985600  | 2.24615700  | 2.64289200  | C         | -4.66387000 | 1.77387100  | -0.59252300 |
| <b>G2</b> |             |             |             | H         | -3.39548800 | 1.47249700  | -2.32680200 |
| C         | 2.09870200  | 3.23739900  | 0.49866700  | H         | -2.52904700 | 2.06330200  | -0.91321300 |
| H         | 2.93134700  | 2.53939700  | 0.37047200  | C         | -5.40012900 | -0.64685500 | -0.68047300 |
| C         | -0.86522200 | -1.35292400 | 2.71531500  | H         | -4.14727400 | -0.99805900 | -2.41821400 |
| H         | -1.70430400 | -1.76582100 | 3.28253500  | H         | -3.78148700 | -2.05437500 | -1.05487600 |
| N         | 0.38774400  | -1.35283300 | -1.66153600 | C         | -5.78172300 | 0.80440300  | -0.99858900 |
| N         | -1.71008500 | -0.41793200 | -1.59858900 | H         | -4.92932000 | 2.80129000  | -0.87272200 |
| N         | -0.44746300 | -0.75011900 | 0.45293400  | H         | -4.55825900 | 1.76444500  | 0.50269300  |
| C         | -0.65921000 | -0.78877400 | -0.95378700 | H         | -6.18778500 | -1.33153400 | -1.01953300 |
| C         | -0.53463800 | 0.52893300  | 1.15549500  | H         | -5.32655900 | -0.76952600 | 0.41035500  |
| H         | -1.24279400 | 1.20730200  | 0.66712800  | H         | -6.71913400 | 1.07151800  | -0.49437600 |
| O         | 1.82949900  | 0.70326300  | 1.72052700  | H         | -5.96507900 | 0.89946100  | -2.07863300 |
| C         | 0.84155100  | 1.21356200  | 1.18461300  | C         | 0.47656200  | -1.84480900 | 3.33412700  |
| N         | 0.88710200  | 2.41622100  | 0.56302700  | H         | 1.06571900  | -1.01506400 | 3.73300400  |
| H         | 0.03557100  | 2.79213100  | 0.16519000  | H         | 0.26383100  | -2.52831000 | 4.16455400  |
| C         | -0.88672600 | -1.90127600 | 1.26793800  | C         | 0.11819800  | -3.05955800 | 1.26278400  |
| H         | -1.88932700 | -2.22837000 | 0.95778200  | H         | 0.46314600  | -3.30581000 | 0.25479900  |
| C         | -1.04040300 | 0.16829300  | 2.56998100  | H         | -0.37647900 | -3.95065500 | 1.67332100  |
| H         | -2.10113400 | 0.43092100  | 2.63769400  | C         | 1.22934900  | -2.58336200 | 2.20869900  |
| H         | -0.51242600 | 0.72478300  | 3.34899300  | H         | 1.85141100  | -3.40509900 | 2.57976400  |
| H         | 0.19367900  | -1.36619300 | -2.65905100 | H         | 1.87903800  | -1.87328600 | 1.69238100  |
| C         | 1.79501900  | -1.12889700 | -1.32431000 | C         | 2.01751600  | 4.15724700  | -0.71684400 |
| C         | 2.64275800  | -2.33374200 | -1.74736200 | H         | 1.89409700  | 3.58233200  | -1.64126900 |
| C         | 2.34457400  | 0.16767100  | -1.94183700 | H         | 1.17366300  | 4.85425700  | -0.62917000 |
| H         | 1.83608100  | -1.03064400 | -0.23867500 | H         | 2.93248200  | 4.75217200  | -0.80367800 |
| C         | 4.11961300  | -2.12835100 | -1.38355200 | C         | 2.30712800  | 4.00758300  | 1.80565900  |
| H         | 2.54737100  | -2.47662000 | -2.83460000 | H         | 3.24092200  | 4.58060700  | 1.76991200  |
| H         | 2.25111300  | -3.24100600 | -1.27243100 | H         | 1.48076400  | 4.70657800  | 1.98343300  |
| C         | 3.81545300  | 0.37701600  | -1.55896700 | H         | 2.36342700  | 3.31273300  | 2.64908700  |
| H         | 2.24940000  | 0.11227400  | -3.03701500 | <b>G3</b> |             |             |             |
| H         | 1.73695800  | 1.01554900  | -1.60811400 | O         | 2.17767200  | 0.32932200  | 3.17610100  |
| C         | 4.67247700  | -0.82515400 | -1.97529300 | H         | -0.19750600 | 0.70382200  | 1.13205100  |
| H         | 4.71318900  | -2.98554300 | -1.72515200 | N         | 0.72757500  | 0.89542600  | 1.51629500  |
| H         | 4.21522100  | -2.09450300 | -0.28884400 | N         | -0.03576200 | -1.88972900 | 1.65079300  |
| H         | 4.19915100  | 1.29919300  | -2.01388600 | N         | -1.23289600 | -2.44685200 | -0.28061500 |
| H         | 3.87838400  | 0.50793300  | -0.46989500 | H         | -2.05250800 | -2.20514800 | -0.82737600 |



|   |             |             |             |                       |             |             |             |
|---|-------------|-------------|-------------|-----------------------|-------------|-------------|-------------|
| N | -1.81765100 | -0.53813600 | 1.05964900  | H                     | 0.32553700  | -2.51649400 | -4.52916600 |
| C | 0.77034500  | -2.01779800 | 3.90319500  | C                     | 0.72805000  | -4.10205700 | -3.11555500 |
| H | 0.44016700  | -1.75731400 | 4.91205300  | H                     | 0.44069400  | -4.89246800 | -3.81964400 |
| H | 1.86250100  | -1.95782000 | 3.88657800  | H                     | 1.58831400  | -4.48499600 | -2.54771200 |
| C | 0.19271000  | -1.05395200 | 2.85600700  | C                     | -0.42893200 | -3.82491700 | -2.14564100 |
| H | -0.77143800 | -0.64117100 | 3.17219200  | H                     | -0.68450600 | -4.72658400 | -1.57639600 |
| C | 1.13766000  | 0.12296100  | 2.55008700  | H                     | -1.32597400 | -3.54290900 | -2.71773000 |
| C | 2.76364900  | 1.59729900  | 0.25365900  | C                     | 4.79606100  | 2.26627200  | -0.89705600 |
| C | 3.64501800  | 2.59467500  | -0.18388500 | H                     | 5.46742300  | 3.05309300  | -1.23053100 |
| H | 3.42047700  | 3.63662400  | 0.03119600  | C                     | 1.50440000  | 2.02036800  | 1.00980100  |
| C | 5.08589200  | 0.92882900  | -1.18215700 | H                     | 1.82726100  | 2.61774200  | 1.87070000  |
| H | 5.98300600  | 0.67002600  | -1.73784300 | C                     | 0.36648700  | -3.28456400 | 1.91938900  |
| C | 4.21671200  | -0.06948500 | -0.74381600 | H                     | 1.39338700  | -3.45679900 | 1.57096200  |
| H | 4.43586400  | -1.11317600 | -0.95255100 | H                     | -0.29498500 | -3.97334400 | 1.39226700  |
| C | 3.06219600  | 0.26325400  | -0.02948800 | C                     | 0.28996400  | -3.39813100 | 3.44302800  |
| H | 2.39277200  | -0.51899600 | 0.30906900  | H                     | 0.90061500  | -4.21737200 | 3.83465800  |
| C | -1.08932700 | -1.58003200 | 0.80579000  | H                     | -0.74971100 | -3.56723200 | 3.74755900  |
| C | -2.82434400 | -0.08341800 | 0.11047300  | C                     | 0.57935200  | 2.87178800  | 0.15055800  |
| H | -2.49078600 | -0.23798500 | -0.93277000 | C                     | -0.09887100 | 3.95673500  | 0.71439600  |
| C | -3.03405600 | 1.42513200  | 0.30338800  | C                     | 0.33675600  | 2.53828700  | -1.18779400 |
| H | -2.08591500 | 1.94665300  | 0.14505400  | C                     | -1.00389600 | 4.70039800  | -0.04514500 |
| H | -3.32035200 | 1.59712600  | 1.35057200  | H                     | 0.08053400  | 4.21500300  | 1.75504200  |
| C | -4.11274700 | 1.98210800  | -0.63098400 | C                     | -0.57157500 | 3.27587300  | -1.94715200 |
| H | -4.24963200 | 3.05451800  | -0.44530200 | H                     | 0.86897800  | 1.70536700  | -1.63671300 |
| H | -3.77282200 | 1.88809100  | -1.67299900 | C                     | -1.24345100 | 4.36030500  | -1.37786800 |
| C | -5.44046600 | 1.23267400  | -0.46112500 | H                     | -1.52124500 | 5.54337300  | 0.40453500  |
| H | -6.18766400 | 1.60947500  | -1.17130800 | H                     | -0.75261800 | 3.00566400  | -2.98393000 |
| H | -5.83608200 | 1.42544400  | 0.54660600  | H                     | -1.94883200 | 4.93683300  | -1.96967200 |
| C | -5.24911300 | -0.27847000 | -0.64362200 |                       |             |             |             |
| H | -4.96359200 | -0.48156300 | -1.68664600 |                       |             |             |             |
| H | -6.19488400 | -0.80753500 | -0.47029400 | <b>H<sub>2</sub>O</b> |             |             |             |
| C | -4.16295500 | -0.82568000 | 0.29210500  | O                     | 0.00000000  | 0.00000000  | 0.12063000  |
| H | -4.47479700 | -0.70772700 | 1.33916700  | H                     | 0.00000000  | 0.76066100  | -0.48251800 |
| H | -4.02751400 | -1.90267500 | 0.12740300  | H                     | 0.00000000  | -0.76066100 | -0.48251800 |
| C | -0.08405800 | -2.68933000 | -1.17820800 |                       |             |             |             |
| H | 0.75964500  | -3.01100800 | -0.56126600 | <b>IMI</b>            |             |             |             |
| C | 0.32934400  | -1.42188900 | -1.94189900 | C                     | -1.75991500 | 1.40477600  | -1.36371500 |
| H | -0.53980100 | -1.05612200 | -2.50842700 | C                     | -2.82229900 | 2.46116900  | -1.67864100 |
| H | 0.60038600  | -0.63725400 | -1.22802200 | C                     | -2.19000000 | 3.84313000  | -1.41457500 |
| C | 1.49138000  | -1.69852700 | -2.90277700 | H                     | -1.85969400 | 3.93563600  | -0.37679900 |
| H | 1.75076800  | -0.78555600 | -3.45240500 | H                     | -2.92146500 | 4.63299400  | -1.62149400 |
| H | 2.38186200  | -1.97328200 | -2.32051800 | H                     | -1.32486700 | 4.00440100  | -2.06884800 |
| C | 1.14903500  | -2.83592700 | -3.87368600 | C                     | -3.27422600 | 2.36539300  | -3.13996900 |
| H | 2.00540300  | -3.05253800 | -4.52421100 | H                     | -2.43700000 | 2.54981300  | -3.81994300 |
|   |             |             |             | H                     | -4.04470900 | 3.12028800  | -3.33498300 |

|   |             |             |             |    |             |             |             |
|---|-------------|-------------|-------------|----|-------------|-------------|-------------|
| H | -3.68725900 | 1.38117500  | -3.37388100 | H  | 1.77756900  | 3.04716300  | 2.53051100  |
| O | -1.34211500 | 0.66615900  | -2.31127300 | H  | -2.35071100 | 1.82172800  | 2.64451300  |
| O | -1.32350400 | -1.46382800 | 0.75647700  | H  | -3.04304600 | 4.17377500  | 2.49685500  |
| C | -5.69295700 | -1.71606100 | -0.89316700 | H  | -1.33858800 | 5.98521900  | 2.34084400  |
| H | -6.10188900 | -2.72152200 | -0.95034500 | H  | 1.08249200  | 5.38251800  | 2.35281100  |
| C | -4.63355900 | -1.44882400 | -0.01627100 | C  | 0.19493100  | 0.82316500  | 2.71166400  |
| C | -4.00178100 | -2.54402700 | 0.81242400  | Rh | 0.11258700  | -0.72966700 | -1.90236000 |
| H | -4.74012800 | -3.32383000 | 1.03300700  | Rh | 0.09050000  | -0.00638600 | 0.39691000  |
| H | -3.66590300 | -2.13157300 | 1.76745500  | O  | 1.54661300  | -2.11763600 | -1.35870800 |
| C | -2.78463500 | -3.24920300 | 0.13683900  | C  | 4.26924500  | -2.96240800 | -0.67317500 |
| C | -3.22158100 | -4.01916200 | -1.11440600 | H  | 4.00555500  | -3.15938800 | -1.71709600 |
| H | -3.66085200 | -3.35751600 | -1.86495100 | H  | 5.01662300  | -3.70776600 | -0.37745400 |
| H | -3.96852200 | -4.77183400 | -0.83655700 | C  | 4.84202600  | -1.56899600 | -0.55154800 |
| H | -2.37268800 | -4.53425600 | -1.57421400 | C  | 5.80879900  | -1.25240500 | 0.41173000  |
| C | -2.14851400 | -4.22003200 | 1.15251500  | H  | 6.19374800  | -2.03231800 | 1.06333500  |
| H | -1.29081500 | -4.74017300 | 0.71008300  | C  | 6.28547700  | 0.05408900  | 0.53041300  |
| H | -2.88259600 | -4.97501000 | 1.45620800  | H  | 7.04454100  | 0.28727400  | 1.27260700  |
| H | -1.80155100 | -3.68974300 | 2.04394200  | C  | 4.37851900  | -0.54939900 | -1.39190300 |
| C | -1.73388000 | -2.18967800 | -0.20802000 | H  | 3.64083600  | -0.78795300 | -2.15058000 |
| O | -1.33386900 | -2.10667200 | -1.41150200 | O  | 1.52207000  | 1.37867600  | -0.07343600 |
| O | -1.35658100 | 1.35239100  | -0.15686900 | O  | 1.54426200  | 0.73709900  | -2.23993300 |
| C | -4.02480600 | 2.26480800  | -0.70330000 | C  | 5.79861800  | 1.06108600  | -0.30479500 |
| H | -3.67313500 | 2.47720100  | 0.31034900  | H  | 6.17807200  | 2.07522900  | -0.21017000 |
| H | -4.77210000 | 3.02516200  | -0.95885000 | C  | 4.83122400  | 0.77044800  | -1.27574600 |
| C | -4.64652500 | 0.88739600  | -0.75012400 | C  | 4.25075700  | 1.84568200  | -2.16526600 |
| C | -5.70669300 | 0.59371300  | -1.61794000 | H  | 4.99359900  | 2.63148200  | -2.34559300 |
| H | -6.12659500 | 1.38121900  | -2.23835300 | H  | 3.98912300  | 1.41449000  | -3.13665100 |
| C | -6.22991300 | -0.69859400 | -1.68331000 | C  | 2.98006300  | 2.54333000  | -1.58713100 |
| H | -7.05971000 | -0.91350800 | -2.35159300 | C  | 3.32241300  | 3.35334400  | -0.33067200 |
| C | -4.13770600 | -0.14064200 | 0.05429300  | H  | 3.72221100  | 2.71791300  | 0.46336500  |
| H | -3.32602700 | 0.07801900  | 0.73906400  | H  | 4.07386700  | 4.11164200  | -0.57937900 |
| C | -0.47885500 | -0.29863600 | 3.43488500  | H  | 2.43604300  | 3.86300800  | 0.05723700  |
| O | -1.79849100 | -0.11633600 | 3.53767800  | C  | 2.39126700  | 3.47719800  | -2.66282200 |
| O | 0.11976000  | -1.26547500 | 3.87029400  | H  | 1.48472800  | 3.97193500  | -2.29459200 |
| C | -2.51630700 | -1.15438000 | 4.23465500  | H  | 3.12063000  | 4.25377000  | -2.91943600 |
| H | -3.56331200 | -0.85577400 | 4.18932900  | H  | 2.13641300  | 2.92432100  | -3.57148700 |
| H | -2.18093900 | -1.21163600 | 5.27331000  | C  | 1.93539600  | 1.46808800  | -1.27437800 |
| H | -2.36742700 | -2.11750000 | 3.74416000  | O  | 1.54637100  | -1.39529300 | 0.78194100  |
| C | 0.71778100  | 3.27674800  | 2.52960200  | C  | 1.95090900  | -2.15907000 | -0.15161400 |
| C | -0.23723100 | 2.25091400  | 2.62722400  | C  | 3.00206500  | -3.21442500 | 0.20268300  |
| C | -1.59845600 | 2.59482500  | 2.60186500  | C  | 2.42011200  | -4.59771100 | -0.14885700 |
| C | -1.98413500 | 3.93094800  | 2.50883000  | H  | 2.16092400  | -4.66019200 | -1.20960500 |
| C | -1.03103800 | 4.94642000  | 2.41724300  | H  | 3.15446500  | -5.37910600 | 0.07749000  |
| C | 0.32316200  | 4.60881300  | 2.42320400  | H  | 1.51757100  | -4.80077200 | 0.43965000  |

|   |            |             |            |   |             |             |             |
|---|------------|-------------|------------|---|-------------|-------------|-------------|
| C | 3.34607600 | -3.15938500 | 1.69607600 | C | -6.45425200 | -0.32281000 | -1.37381900 |
| H | 2.45978800 | -3.34870700 | 2.30898300 | H | -7.31721800 | -0.53769600 | -1.99869600 |
| H | 4.09460000 | -3.92615400 | 1.92733000 | C | -4.27745000 | 0.23898300  | 0.25439500  |
| H | 3.74815100 | -2.18520900 | 1.98360900 | H | -3.43521700 | 0.46169500  | 0.90050900  |
| N | 1.53243000 | 0.63852200  | 2.78021300 | C | -0.15251000 | -0.16129900 | 3.30994300  |
| N | 2.64356500 | 0.46992000  | 2.78205300 | O | -1.43281500 | -0.25932100 | 3.69430100  |

## IM2

|   |             |             |             |    |             |             |             |
|---|-------------|-------------|-------------|----|-------------|-------------|-------------|
| C | -1.88396000 | 1.52551700  | -1.40110700 | H  | -2.80694900 | -1.32777100 | 4.73390200  |
| C | -2.88549800 | 2.64205400  | -1.71441800 | H  | -1.27422700 | -1.05643000 | 5.62010400  |
| C | -2.15893000 | 3.99101600  | -1.53822800 | H  | -1.33479900 | -2.25877500 | 4.30148800  |
| H | -1.78628100 | 4.10964200  | -0.51664800 | C  | 0.35380800  | 3.23583500  | 1.67991100  |
| H | -2.84870700 | 4.81521400  | -1.75277700 | C  | 0.24733800  | 2.19747800  | 2.64548200  |
| H | -1.31156200 | 4.07278100  | -2.22933100 | C  | 0.36658100  | 2.54057900  | 4.02274700  |
| C | -3.40690700 | 2.51656500  | -3.15010100 | C  | 0.58987700  | 3.85139700  | 4.40922500  |
| H | -2.58817200 | 2.59385300  | -3.87207900 | C  | 0.68623200  | 4.85688500  | 3.43738100  |
| H | -4.11915000 | 3.32484600  | -3.35226300 | C  | 0.56247000  | 4.54812800  | 2.07800400  |
| H | -3.91084500 | 1.56143800  | -3.31572600 | H  | 0.26009200  | 2.98539900  | 0.63452500  |
| O | -1.59437200 | 0.68967200  | -2.30554000 | H  | 0.30297100  | 1.76300400  | 4.77699800  |
| O | -1.51243600 | -1.23166300 | 0.90020400  | H  | 0.68909000  | 4.09976400  | 5.46121900  |
| C | -5.95387700 | -1.30617000 | -0.51905800 | H  | 0.85726500  | 5.88511200  | 3.74336300  |
| H | -6.42553200 | -2.28468800 | -0.48331400 | H  | 0.63458700  | 5.33500400  | 1.33340700  |
| C | -4.85109100 | -1.03781900 | 0.30245200  | C  | 0.03786300  | 0.84601800  | 2.23933700  |
| C | -4.25143800 | -2.10117900 | 1.19389300  | Rh | -0.21512400 | -0.79844800 | -1.90187600 |
| H | -5.02710800 | -2.80270300 | 1.52263600  | Rh | -0.03196500 | 0.10759100  | 0.37733900  |
| H | -3.82927100 | -1.63192300 | 2.08781100  | O  | 1.13678300  | -2.25053500 | -1.33683500 |
| C | -3.12668200 | -2.94551800 | 0.51627200  | C  | 3.79594900  | -3.30939700 | -0.79044300 |
| C | -3.68547700 | -3.78572900 | -0.63768200 | H  | 3.41828800  | -3.56066700 | -1.78653700 |
| H | -4.12052800 | -3.16107100 | -1.42134000 | H  | 4.48980200  | -4.10424300 | -0.49307400 |
| H | -4.46350500 | -4.45803600 | -0.25771200 | C  | 4.51799300  | -1.98204100 | -0.84755900 |
| H | -2.89955800 | -4.39667600 | -1.09221300 | C  | 5.63051900  | -1.71163800 | -0.04046100 |
| C | -2.49231300 | -3.86992100 | 1.57379100  | H  | 6.01317500  | -2.48284000 | 0.62316300  |
| H | -1.67768200 | -4.45990800 | 1.13713200  | C  | 6.25337000  | -0.46355100 | -0.09181900 |
| H | -3.24504400 | -4.56574400 | 1.96179100  | H  | 7.12319100  | -0.26698300 | 0.52971100  |
| H | -2.08783700 | -3.29260000 | 2.40904300  | C  | 4.05854300  | -0.97726500 | -1.70763000 |
| C | -2.03744800 | -1.99088100 | 0.01563500  | H  | 3.21178800  | -1.18379600 | -2.35265700 |
| O | -1.72873500 | -2.01695400 | -1.21151300 | O  | 1.47188400  | 1.32120700  | -0.34185900 |
| O | -1.39753500 | 1.53710500  | -0.21762600 | O  | 1.30858500  | 0.49590200  | -2.44108800 |
| C | -4.05410400 | 2.56982700  | -0.68167900 | C  | 5.76628400  | 0.53335900  | -0.93877300 |
| H | -3.65025400 | 2.81998600  | 0.30426700  | H  | 6.25601100  | 1.50319200  | -0.97390900 |
| H | -4.76907000 | 3.35544100  | -0.95272200 | C  | 4.65541200  | 0.28822600  | -1.75632600 |
| C | -4.75146000 | 1.23056000  | -0.61375900 | C  | 4.08266600  | 1.35540700  | -2.66154500 |
| C | -5.85385300 | 0.93608500  | -1.42679900 | H  | 4.87018000  | 2.05543400  | -2.96416300 |
| H | -6.24816600 | 1.69757100  | -2.09466900 | H  | 3.69134700  | 0.88976400  | -3.57145600 |

|   |            |             |             |   |             |             |             |
|---|------------|-------------|-------------|---|-------------|-------------|-------------|
| C | 2.93924200 | 2.20511500  | -2.02395800 | C | -5.31531600 | 0.78852100  | 2.89854000  |
| C | 3.47093400 | 3.04325500  | -0.85538500 | H | -5.87659900 | 0.22178800  | 2.15156800  |
| H | 3.89176600 | 2.41760800  | -0.06590900 | H | -6.00009400 | 1.49245800  | 3.38577300  |
| H | 4.25546300 | 3.71757700  | -1.21795800 | H | -4.95565000 | 0.08387700  | 3.65429800  |
| H | 2.67750000 | 3.65187400  | -0.41138200 | C | -3.36875500 | 2.31390000  | 3.36421900  |
| C | 2.34980800 | 3.13442500  | -3.10352000 | H | -2.98836500 | 1.61785200  | 4.12102500  |
| H | 1.53637000 | 3.74326000  | -2.69092800 | H | -4.02706300 | 3.03348200  | 3.86424900  |
| H | 3.12568100 | 3.81386500  | -3.47417300 | H | -2.51657700 | 2.85330500  | 2.94183100  |
| H | 1.95622000 | 2.56153000  | -3.94802100 | C | -3.17207500 | 0.60271200  | 1.57918900  |
| C | 1.82032100 | 1.26033600  | -1.56727600 | O | -3.37832600 | -0.64310400 | 1.66691100  |
| O | 1.33325700 | -1.38475500 | 0.74443600  | O | -1.87070300 | -0.06667700 | -1.72336000 |
| C | 1.61248700 | -2.23843200 | -0.15846800 | C | -4.17845700 | 0.54274400  | -3.35783400 |
| C | 2.59611300 | -3.35629800 | 0.20690500  | H | -3.35514600 | 1.25587400  | -3.46544000 |
| C | 1.85734900 | -4.69861700 | 0.03030500  | H | -4.73640000 | 0.54031100  | -4.30146800 |
| H | 1.49800300 | -4.82140300 | -0.99543000 | C | -5.07729200 | 0.97735800  | -2.22300800 |
| H | 2.53342800 | -5.52884200 | 0.26481800  | C | -6.45655000 | 0.73241600  | -2.24504200 |
| H | 0.99651700 | -4.76192100 | 0.70686900  | H | -6.90421000 | 0.25576300  | -3.11327000 |
| C | 3.08131700 | -3.22034300 | 1.65451300  | C | -7.25757900 | 1.10740500  | -1.16516700 |
| H | 2.24306900 | -3.25836800 | 2.35591200  | H | -8.32842600 | 0.92389800  | -1.19627100 |
| H | 3.76391300 | -4.04630400 | 1.88693300  | C | -4.52916700 | 1.61404100  | -1.10252000 |
| H | 3.60938800 | -2.27934900 | 1.81925300  | H | -3.46588700 | 1.82513900  | -1.08363200 |
| N | 3.27000400 | 0.92050400  | 2.61926000  | H | 2.80756500  | -0.31280000 | 0.07758400  |
| N | 3.53242900 | 0.39661100  | 1.68272700  | C | 3.59526300  | 3.24231000  | 1.25170700  |

### IM3

|   |             |             |             |   |            |             |             |
|---|-------------|-------------|-------------|---|------------|-------------|-------------|
| C | -2.79965200 | -0.93518900 | -1.86174700 | C | 3.82031500 | 4.59267500  | 1.50327800  |
| C | -3.56410900 | -0.88250300 | -3.18914600 | C | 4.83592500 | 5.27620000  | 0.82521700  |
| C | -2.54945600 | -1.11712400 | -4.32615600 | C | 5.62495900 | 4.59831900  | -0.10580100 |
| H | -1.76986800 | -0.34980200 | -4.32340400 | C | 5.40325200 | 3.24339800  | -0.35737700 |
| H | -3.06229400 | -1.08811800 | -5.29419700 | C | 4.38431200 | 2.55283800  | 0.31605400  |
| H | -2.07063700 | -2.09868100 | -4.22666200 | C | 4.07233300 | 1.13182700  | 0.00291000  |
| C | -4.65334400 | -1.95971400 | -3.23321000 | C | 5.09494300 | 0.31861700  | -0.72108100 |
| H | -4.21889700 | -2.96064600 | -3.14956500 | C | 4.76095000 | -0.29333300 | -1.93501300 |
| H | -5.18923900 | -1.89870500 | -4.18753300 | C | 5.68223100 | -1.11110000 | -2.59044000 |
| H | -5.37558700 | -1.83785700 | -2.42240400 | C | 6.94447200 | -1.32929400 | -2.03365500 |
| O | -3.11574800 | -1.81406800 | -1.00867800 | C | 7.28877900 | -0.71015200 | -0.82834500 |
| O | -2.19783500 | 1.15484500  | 0.96294600  | C | 6.37376700 | 0.12026300  | -0.18094600 |
| C | -6.68999200 | 1.71919800  | -0.04641900 | N | 2.92329900 | 0.66950600  | 0.33737100  |
| H | -7.31881300 | 2.00833000  | 0.79162200  | H | 2.79338400 | 2.71018000  | 1.74833500  |
| C | -5.31328500 | 1.97467100  | 0.00047700  | H | 3.20109200 | 5.11468500  | 2.22778700  |
| C | -4.66496100 | 2.59273700  | 1.21801300  | H | 6.41241100 | 5.12334700  | -0.63948800 |
| H | -5.37614200 | 3.24864900  | 1.73382500  | H | 6.01143000 | 2.72684100  | -1.09232700 |
| H | -3.81728700 | 3.20850200  | 0.90458100  | H | 3.78169800 | -0.11352200 | -2.36504300 |
| C | -4.15002000 | 1.56030400  | 2.26896800  | H | 5.41286800 | -1.57818200 | -3.53366800 |
|   |             |             |             | H | 8.27060300 | -0.87352000 | -0.39287400 |
|   |             |             |             | H | 6.64065100 | 0.60433800  | 0.75403500  |

|    |             |             |             |            |             |             |             |
|----|-------------|-------------|-------------|------------|-------------|-------------|-------------|
| H  | 7.65991400  | -1.97220300 | -2.53869800 | H          | 2.89097600  | -2.11094300 | -1.74060900 |
| H  | 5.01047100  | 6.33038800  | 1.02280400  | H          | 2.93739200  | -3.44259600 | -2.90684100 |
| C  | -0.03139200 | 2.82150100  | 0.32278800  | H          | 1.78723700  | -2.10881600 | -3.12082200 |
| O  | -0.89906800 | 3.65243400  | -0.28996300 | C          | 0.41935200  | -4.43060700 | -2.49726100 |
| O  | 0.41920200  | 3.00670000  | 1.43486000  | H          | -0.09077400 | -3.83274500 | -3.26236500 |
| C  | -1.33286800 | 4.78695100  | 0.48614400  | H          | 1.07783400  | -5.14172500 | -3.00910500 |
| H  | -2.06574300 | 5.30014400  | -0.13630500 | H          | -0.33597100 | -4.99294600 | -1.94191900 |
| H  | -0.48603000 | 5.44547500  | 0.69828100  | C          | 0.29572500  | -2.59248900 | -0.81457300 |
| H  | -1.78715000 | 4.46001400  | 1.42342200  | O          | 0.21119800  | -0.13181600 | 1.81255700  |
| C  | 0.99728100  | 0.90057700  | -2.77832500 | C          | -0.06832700 | -1.03855200 | 2.65797400  |
| C  | 1.00151300  | 1.85579400  | -1.72942600 | C          | 0.73280000  | -1.02210400 | 3.96496100  |
| C  | 1.80408000  | 3.01964300  | -1.87444600 | C          | -0.26077400 | -0.97119400 | 5.14079900  |
| C  | 2.58863000  | 3.20086300  | -3.00232600 | H          | -0.95701200 | -1.81425600 | 5.11162900  |
| C  | 2.55850900  | 2.25134000  | -4.03182500 | H          | 0.28590900  | -1.00248800 | 6.09047600  |
| C  | 1.75435100  | 1.11074200  | -3.92313500 | H          | -0.84321600 | -0.04258200 | 5.11643700  |
| H  | 0.38417600  | 0.01803700  | -2.67508100 | C          | 1.66142100  | 0.19809600  | 4.01761300  |
| H  | 1.83559600  | 3.75218600  | -1.07578600 | H          | 1.08589700  | 1.12691600  | 3.96041400  |
| H  | 3.22258800  | 4.07778600  | -3.08613700 | H          | 2.21606600  | 0.19237400  | 4.96362800  |
| H  | 3.16395500  | 2.40247500  | -4.92105400 | H          | 2.37441400  | 0.20393800  | 3.19095900  |
| H  | 1.73196800  | 0.38328000  | -4.72901900 |            |             |             |             |
| C  | 0.22144400  | 1.64138600  | -0.55043100 | <b>IM4</b> |             |             |             |
| Rh | -2.06661800 | -1.95616200 | 0.76720400  | C          | 0.96157800  | 2.06988700  | -1.74759400 |
| Rh | -0.76767000 | 0.00017700  | 0.02265000  | C          | 2.11150700  | 2.50722100  | -2.66254200 |
| O  | -0.94141700 | -1.95131200 | 2.50786300  | C          | 2.01257900  | 1.67459600  | -3.95716300 |
| C  | 1.55046200  | -2.34878500 | 4.05417000  | H          | 2.05545800  | 0.60400100  | -3.74748400 |
| H  | 0.84577100  | -3.17294700 | 4.20485100  | H          | 2.83754100  | 1.93213700  | -4.63121300 |
| H  | 2.17171100  | -2.28097100 | 4.95486800  | H          | 1.07080200  | 1.88087300  | -4.47893600 |
| C  | 2.40836200  | -2.64320200 | 2.84512400  | C          | 1.99124600  | 3.99637500  | -3.01012900 |
| C  | 3.71855100  | -2.15979100 | 2.72836500  | H          | 1.05734600  | 4.19834800  | -3.54219300 |
| H  | 4.15442700  | -1.58299300 | 3.53959000  | H          | 2.82483500  | 4.28852800  | -3.65952300 |
| C  | 4.46920100  | -2.42521400 | 1.58243400  | H          | 2.01358900  | 4.62564000  | -2.11738700 |
| H  | 5.48494300  | -2.05110600 | 1.50120400  | O          | 0.02386000  | 2.88812600  | -1.53715300 |
| C  | 1.88170800  | -3.39906000 | 1.79138700  | O          | 0.49178500  | 1.13414500  | 1.63258800  |
| H  | 0.87052200  | -3.78421300 | 1.87549400  | C          | 3.86125300  | 4.36926500  | 1.76383200  |
| O  | 0.55275900  | -1.34176400 | -0.84085300 | H          | 3.94172200  | 4.92342900  | 2.69561800  |
| O  | -0.68003400 | -3.13313700 | -0.21279500 | C          | 3.19241400  | 3.13849800  | 1.74795200  |
| C  | 3.92152800  | -3.16725500 | 0.53422800  | C          | 2.53551900  | 2.58545300  | 2.99232100  |
| H  | 4.51511000  | -3.36551200 | -0.35377600 | H          | 3.03291800  | 2.98642800  | 3.88336300  |
| C  | 2.61390100  | -3.66226800 | 0.62715500  | H          | 2.64534700  | 1.49919500  | 3.01749100  |
| C  | 1.96394900  | -4.42970100 | -0.50115100 | C          | 1.01770200  | 2.91243000  | 3.13179700  |
| H  | 2.70854500  | -5.03051100 | -1.03649300 | C          | 0.79117800  | 4.42174700  | 3.27446800  |
| H  | 1.22200800  | -5.11996100 | -0.08781400 | H          | 1.14103800  | 4.96938600  | 2.39528100  |
| C  | 1.25008200  | -3.53255800 | -1.56189500 | H          | 1.33516900  | 4.79299900  | 4.15116900  |
| C  | 2.27728700  | -2.74554100 | -2.37774900 | H          | -0.27043200 | 4.64691000  | 3.41180600  |

|   |             |             |             |    |             |             |             |
|---|-------------|-------------|-------------|----|-------------|-------------|-------------|
| C | 0.47305300  | 2.18136100  | 4.37655200  | O  | -0.07167100 | -3.05503400 | -1.46385300 |
| H | -0.59855600 | 2.37661300  | 4.50316100  | C  | -2.42070900 | -3.62661400 | -0.28843900 |
| H | 0.99014500  | 2.53920900  | 5.27477800  | H  | -3.04024900 | -4.09697300 | 0.47609600  |
| H | 0.62077000  | 1.10112800  | 4.29633400  | H  | -2.06522800 | -4.37311400 | -1.00166200 |
| C | 0.26408100  | 2.35413400  | 1.91812900  | H  | -2.98914600 | -2.85048600 | -0.80258100 |
| O | -0.54055900 | 3.11943200  | 1.30332300  | C  | 2.10754300  | -1.15933800 | 2.35105200  |
| O | 1.02074000  | 0.88026500  | -1.26764600 | C  | 0.95305600  | -1.79745500 | 1.85532300  |
| C | 3.46992200  | 2.20953100  | -1.95792400 | C  | 0.11794400  | -2.43133200 | 2.79359100  |
| H | 3.54743000  | 1.13013000  | -1.79655900 | C  | 0.44459500  | -2.45065700 | 4.15010800  |
| H | 4.26518500  | 2.48550400  | -2.66012600 | C  | 1.60808700  | -1.83983700 | 4.61901500  |
| C | 3.65766300  | 2.94714900  | -0.65019400 | C  | 2.43581000  | -1.18686700 | 3.70296200  |
| C | 4.32353300  | 4.17928300  | -0.60471700 | H  | 2.75888500  | -0.62503200 | 1.66855000  |
| H | 4.75850700  | 4.58816700  | -1.51310300 | H  | -0.78923100 | -2.91125800 | 2.45960000  |
| C | 4.42883900  | 4.88199600  | 0.59631400  | H  | -0.21993200 | -2.96056800 | 4.84337100  |
| H | 4.95304200  | 5.83377200  | 0.62213400  | H  | 1.86202100  | -1.86538100 | 5.67506800  |
| C | 3.11788300  | 2.43646800  | 0.53717600  | H  | 3.34137000  | -0.68971600 | 4.04144000  |
| H | 2.60430100  | 1.48317800  | 0.51845800  | C  | 0.65667800  | -1.73283800 | 0.39379000  |
| H | 1.91591300  | -0.77272300 | -1.01443300 | Rh | -1.57473400 | 2.37877900  | -0.31983000 |
| C | 2.10352700  | -4.83080200 | -0.06695000 | Rh | -0.45899300 | 0.22347500  | 0.03898500  |
| C | 2.13246400  | -5.96925800 | 0.73905700  | O  | -3.06058700 | 1.70988100  | 0.95788200  |
| C | 2.91574600  | -5.99648300 | 1.89387800  | C  | -5.44243200 | 0.15494000  | 1.62395800  |
| C | 3.68287800  | -4.88289400 | 2.24175000  | H  | -5.65548000 | 1.20330500  | 1.39282900  |
| C | 3.66280700  | -3.74172900 | 1.44240200  | H  | -6.22452700 | -0.19407100 | 2.30858000  |
| C | 2.85990300  | -3.70975200 | 0.29448000  | C  | -5.47257300 | -0.65411700 | 0.34671500  |
| C | 2.83056000  | -2.48899200 | -0.55578800 | C  | -5.90705500 | -1.98647200 | 0.32508500  |
| C | 3.87606800  | -2.26357300 | -1.56183100 | H  | -6.25966500 | -2.45187100 | 1.24193500  |
| C | 3.56825500  | -1.57328000 | -2.74948900 | C  | -5.90594900 | -2.71143300 | -0.86808000 |
| C | 4.55928800  | -1.32984400 | -3.69410400 | H  | -6.25579100 | -3.74058500 | -0.87546000 |
| C | 5.86601400  | -1.76912200 | -3.46420800 | C  | -5.04828900 | -0.07376100 | -0.85456700 |
| C | 6.17322400  | -2.47774400 | -2.29965700 | H  | -4.72384200 | 0.96104200  | -0.85333600 |
| C | 5.18251100  | -2.74107900 | -1.35807700 | O  | -1.51438600 | -0.47748600 | -1.59886700 |
| N | 1.87740100  | -1.61434900 | -0.42767600 | O  | -2.50415100 | 1.52615700  | -1.95820500 |
| H | 1.48615700  | -4.79890100 | -0.95627200 | C  | -5.46048700 | -2.12078500 | -2.05240400 |
| H | 1.53736000  | -6.83426000 | 0.46165400  | H  | -5.46308500 | -2.68908700 | -2.97889200 |
| H | 4.29239700  | -4.89574500 | 3.14014300  | C  | -5.02171300 | -0.79025400 | -2.05764000 |
| H | 4.24483500  | -2.87142800 | 1.72212000  | C  | -4.50172600 | -0.12756200 | -3.31277800 |
| H | 2.54526100  | -1.27823000 | -2.95325400 | H  | -4.97237400 | -0.57188000 | -4.19773200 |
| H | 4.31010400  | -0.80708200 | -4.61208000 | H  | -4.76879700 | 0.93387700  | -3.29847700 |
| H | 7.18487400  | -2.83186600 | -2.12800700 | C  | -2.95743000 | -0.23409700 | -3.51029400 |
| H | 5.42097100  | -3.30148600 | -0.46167500 | C  | -2.54243700 | -1.68173200 | -3.79438500 |
| H | 6.64019100  | -1.57555100 | -4.20069200 | H  | -2.80597000 | -2.35290900 | -2.97594600 |
| H | 2.92933600  | -6.88284700 | 2.52137700  | H  | -3.04401300 | -2.03139900 | -4.70474000 |
| C | -0.24754300 | -2.67237700 | -0.31103000 | H  | -1.46210700 | -1.75774700 | -3.94613400 |
| O | -1.32652600 | -3.02186000 | 0.41447500  | C  | -2.54794300 | 0.65950200  | -4.69765800 |

|   |             |             |             |   |             |             |             |
|---|-------------|-------------|-------------|---|-------------|-------------|-------------|
| H | -1.46507400 | 0.61073500  | -4.86536900 | C | 2.93539200  | -1.65986400 | -1.00109400 |
| H | -3.04651300 | 0.31784900  | -5.61222400 | O | 2.91324500  | -2.22630800 | 0.13595300  |
| H | -2.82096800 | 1.70335200  | -4.52042800 | O | 1.71444300  | 1.13935500  | 0.75235700  |
| C | -2.26827000 | 0.31054400  | -2.25152600 | C | 4.08076600  | 2.63742500  | 1.24347100  |
| O | -2.01012800 | -0.27078300 | 1.28381600  | H | 3.34844700  | 3.09480900  | 0.57198200  |
| C | -2.96229800 | 0.54836900  | 1.47174400  | H | 4.64382400  | 3.44891600  | 1.71941800  |
| C | -4.09319200 | 0.09753000  | 2.40570500  | C | 5.02072100  | 1.74875700  | 0.46074900  |
| C | -4.16045200 | 1.09080300  | 3.58196400  | C | 6.36179000  | 1.60071400  | 0.84035200  |
| H | -4.33273800 | 2.11163500  | 3.22849000  | H | 6.74948300  | 2.17809500  | 1.67582700  |
| H | -4.97684900 | 0.81387700  | 4.25907000  | C | 7.19990100  | 0.72188100  | 0.15326900  |
| H | -3.22528100 | 1.07850800  | 4.15412600  | H | 8.24056300  | 0.62181300  | 0.45070500  |
| C | -3.83167900 | -1.31730200 | 2.93675600  | C | 4.55105500  | 1.01100700  | -0.63358200 |
| H | -2.89279900 | -1.35864900 | 3.49604700  | H | 3.52254300  | 1.13696400  | -0.95184100 |
| H | -4.64681300 | -1.61243300 | 3.60845600  | H | -1.27225100 | 0.07352700  | -2.97041000 |
| H | -3.76885400 | -2.04644200 | 2.12601000  | C | -2.71953400 | 4.30846800  | -1.64040500 |

**IMS'**

|   |            |             |             |   |             |             |             |
|---|------------|-------------|-------------|---|-------------|-------------|-------------|
| C | 2.42688500 | 0.80588500  | 1.75312000  | C | -4.13977800 | 4.83998000  | 0.70210000  |
| C | 3.30471000 | 1.89773000  | 2.37552600  | C | -3.98318900 | 3.52585800  | 0.26432100  |
| C | 2.36249800 | 2.90231000  | 3.06845900  | C | -3.24267400 | 3.24399400  | -0.89317000 |
| H | 1.67364700 | 3.35596200  | 2.35322400  | C | -3.04186800 | 1.83256100  | -1.33045400 |
| H | 2.95066600 | 3.69860700  | 3.53945800  | C | -4.26144100 | 1.00395000  | -1.51160100 |
| H | 1.77470400 | 2.40748100  | 3.85109800  | C | -4.17516700 | -0.39795900 | -1.46360200 |
| C | 4.26556800 | 1.29972300  | 3.41043300  | C | -5.29862900 | -1.18203800 | -1.71185100 |
| H | 3.71289500 | 0.83687400  | 4.23310400  | C | -6.53094300 | -0.58428300 | -1.99191800 |
| H | 4.89478500 | 2.09502700  | 3.82661200  | C | -6.63171900 | 0.80789500  | -2.02163000 |
| H | 4.91664100 | 0.54020900  | 2.97109200  | C | -5.50716500 | 1.59661500  | -1.78203900 |
| O | 2.44720200 | -0.34964600 | 2.28473600  | N | -1.91694000 | 1.26941000  | -1.63793900 |
| O | 2.07542000 | -0.81668800 | -1.41885200 | H | -2.17094200 | 4.10262200  | -2.55315200 |
| C | 6.70542900 | -0.03248100 | -0.91183400 | H | -2.46104000 | 6.43674500  | -1.78998200 |
| H | 7.35894900 | -0.72408100 | -1.43768200 | H | -4.69645200 | 5.04249100  | 1.61296600  |
| C | 5.37057300 | 0.10103000  | -1.31509300 | H | -4.41894200 | 2.70902100  | 0.82946900  |
| C | 4.80190900 | -0.74388100 | -2.43192500 | H | -3.22087200 | -0.85367500 | -1.22374100 |
| H | 5.60437700 | -1.05972700 | -3.10858300 | H | -5.21596000 | -2.26217700 | -1.66949500 |
| H | 4.09740200 | -0.15173500 | -3.01832900 | H | -7.58433600 | 1.28296900  | -2.23965100 |
| C | 4.07349900 | -2.03766700 | -1.95710000 | H | -5.58987600 | 2.67702100  | -1.82622800 |
| C | 5.06210900 | -2.99390600 | -1.27829500 | H | -7.40628900 | -1.19989300 | -2.18058700 |
| H | 5.50848200 | -2.54918000 | -0.38554800 | H | -3.70014600 | 6.91621700  | 0.31204200  |
| H | 5.86720900 | -3.24114000 | -1.98003800 | C | 0.15124700  | 1.17161200  | -2.60245500 |
| H | 4.56908000 | -3.92447100 | -0.98220600 | O | 1.36582400  | 1.58417200  | -2.91781300 |
| C | 3.44106400 | -2.73611800 | -3.17801100 | O | -0.37869600 | 0.23295600  | -3.38192700 |
| H | 2.91558500 | -3.64909500 | -2.87456600 | C | 1.97630600  | 1.05135900  | -4.10903000 |
| H | 4.22360400 | -3.01683800 | -3.89224100 | H | 2.96632900  | 1.50417400  | -4.14174200 |
| H | 2.72466500 | -2.08486700 | -3.68627600 | H | 1.39997500  | 1.34721800  | -4.99045300 |

|    |             |             |             |              |             |             |             |
|----|-------------|-------------|-------------|--------------|-------------|-------------|-------------|
| H  | 2.04977700  | -0.03316500 | -4.05051300 | O            | -0.62786000 | -1.77439400 | -1.01133800 |
| C  | -0.63030200 | 3.17693300  | 0.47901700  | C            | -0.49022100 | -2.95423300 | -0.55468300 |
| C  | -0.16824100 | 2.97217700  | -0.83124400 | C            | -1.25479900 | -4.09990500 | -1.22711000 |
| C  | 0.62465700  | 3.96965400  | -1.41930400 | C            | -0.20301300 | -5.03457900 | -1.86070400 |
| C  | 0.92398700  | 5.14465300  | -0.72707200 | H            | 0.48296900  | -5.42964900 | -1.10566900 |
| C  | 0.42374200  | 5.35296300  | 0.55826700  | H            | -0.70250900 | -5.87703500 | -2.35267200 |
| C  | -0.35419600 | 4.35843700  | 1.15835200  | H            | 0.38576400  | -4.50169500 | -2.61688200 |
| H  | -1.21345900 | 2.39939700  | 0.95359800  | C            | -2.20061000 | -3.58103000 | -2.31383300 |
| H  | 0.99017600  | 3.84140100  | -2.43083000 | H            | -1.65278000 | -3.02974800 | -3.08398200 |
| H  | 1.53233400  | 5.90709000  | -1.20659600 | H            | -2.70682400 | -4.42679400 | -2.79339300 |
| H  | 0.63986700  | 6.27569200  | 1.08973000  | H            | -2.96198800 | -2.91810900 | -1.90129400 |
| H  | -0.74518800 | 4.50236400  | 2.16191400  |              |             |             |             |
| C  | -0.60613400 | 1.76195300  | -1.57656400 |              |             |             |             |
| Rh | 1.35727800  | -1.85217900 | 1.41239900  |              |             |             |             |
| Rh | 0.50094700  | -0.24404800 | -0.18385500 |              |             |             |             |
| O  | 0.26006300  | -3.28393700 | 0.42067500  |              |             |             |             |
| C  | -2.03920000 | -4.89469300 | -0.13690300 |              |             |             |             |
| H  | -1.30918300 | -5.34870500 | 0.54017600  |              |             |             |             |
| H  | -2.56162100 | -5.71076700 | -0.64932700 |              |             |             |             |
| C  | -3.02652100 | -4.06960900 | 0.65873000  |              |             |             |             |
| C  | -4.38354500 | -4.02191800 | 0.31630700  |              |             |             |             |
| H  | -4.74894800 | -4.62040900 | -0.51462500 |              |             |             |             |
| C  | -5.26668300 | -3.21605300 | 1.03733500  |              |             |             |             |
| H  | -6.31831700 | -3.18836300 | 0.76551700  |              |             |             |             |
| C  | -2.58870900 | -3.30945900 | 1.75135500  |              |             |             |             |
| H  | -1.54857600 | -3.36512800 | 2.04732700  |              |             |             |             |
| O  | -1.03941300 | 0.10828800  | 1.13745500  |              |             |             |             |
| O  | -0.23990900 | -1.38773800 | 2.63031900  |              |             |             |             |
| C  | -4.80434400 | -2.43626900 | 2.09767400  |              |             |             |             |
| H  | -5.49578600 | -1.80231800 | 2.64690200  |              |             |             |             |
| C  | -3.45368400 | -2.47354600 | 2.46844200  |              |             |             |             |
| C  | -2.92365900 | -1.62160300 | 3.60058100  |              |             |             |             |
| H  | -3.73705900 | -1.38013800 | 4.29463600  |              |             |             |             |
| H  | -2.17083900 | -2.18223600 | 4.16322100  |              |             |             |             |
| C  | -2.28974100 | -0.26792900 | 3.15833600  |              |             |             |             |
| C  | -3.32926800 | 0.62397300  | 2.47137100  |              |             |             |             |
| H  | -3.70685800 | 0.17325900  | 1.55064600  |              |             |             |             |
| H  | -4.17504600 | 0.78908000  | 3.14916000  |              |             |             |             |
| H  | -2.90164300 | 1.59755400  | 2.22114300  |              |             |             |             |
| C  | -1.73026800 | 0.45084600  | 4.40387500  |              |             |             |             |
| H  | -1.24979900 | 1.39581700  | 4.12380400  |              |             |             |             |
| H  | -2.54478500 | 0.67865400  | 5.10096100  |              |             |             |             |
| H  | -0.99251700 | -0.16989400 | 4.92132200  |              |             |             |             |
| C  | -1.10223400 | -0.54056000 | 2.22936400  |              |             |             |             |
|    |             |             |             | <b>IM5-R</b> |             |             |             |
|    |             |             |             | C            | 4.07869500  | -0.19174300 | 1.29846700  |
|    |             |             |             | C            | 4.09595400  | -1.28261700 | 2.37358200  |
|    |             |             |             | C            | 4.06709800  | -1.00204200 | 3.74271500  |
|    |             |             |             | C            | 4.17838000  | -2.62324100 | 1.96743400  |
|    |             |             |             | C            | 4.08677200  | -2.03618700 | 4.68342700  |
|    |             |             |             | H            | 4.02170100  | 0.02544000  | 4.08423100  |
|    |             |             |             | C            | 4.19756700  | -3.65546600 | 2.90266100  |
|    |             |             |             | H            | 4.23085700  | -2.85937400 | 0.90898200  |
|    |             |             |             | C            | 4.14312200  | -3.36551200 | 4.26909100  |
|    |             |             |             | H            | 4.05228500  | -1.79527400 | 5.74252000  |
|    |             |             |             | H            | 4.25648600  | -4.68707000 | 2.56572700  |
|    |             |             |             | H            | 4.15111600  | -4.16854000 | 5.00093200  |
|    |             |             |             | C            | 3.85645600  | 1.21870200  | 1.81156600  |
|    |             |             |             | C            | 4.84984000  | 2.18339300  | 1.61336400  |
|    |             |             |             | C            | 2.68558300  | 1.57909700  | 2.49347300  |
|    |             |             |             | C            | 4.68653600  | 3.48571100  | 2.09104600  |
|    |             |             |             | H            | 5.75958500  | 1.91080200  | 1.08390900  |
|    |             |             |             | C            | 2.52353000  | 2.87811000  | 2.97418900  |
|    |             |             |             | H            | 1.89412400  | 0.84924000  | 2.62783400  |
|    |             |             |             | C            | 3.52345100  | 3.83427400  | 2.77858500  |
|    |             |             |             | H            | 5.46818400  | 4.22303600  | 1.92914200  |
|    |             |             |             | H            | 1.60803700  | 3.14394600  | 3.49547100  |
|    |             |             |             | H            | 3.39271400  | 4.84573600  | 3.15358500  |
|    |             |             |             | H            | 5.05049600  | -0.21362200 | 0.79905400  |
|    |             |             |             | C            | 2.61287100  | -0.75179100 | -4.31916700 |
|    |             |             |             | H            | 1.85869000  | -1.12016000 | -5.02038400 |
|    |             |             |             | N            | -0.23391400 | 0.98922300  | -1.50328700 |
|    |             |             |             | N            | -0.35892800 | -1.30160200 | -1.24599100 |
|    |             |             |             | N            | 1.53867600  | -0.34741400 | -2.23849300 |
|    |             |             |             | C            | 0.31542400  | -0.21578000 | -1.67143500 |
|    |             |             |             | C            | 2.45560100  | -1.45680900 | -1.94576600 |



|   |             |             |             |   |             |             |             |
|---|-------------|-------------|-------------|---|-------------|-------------|-------------|
| H | 1.92120500  | -2.26055000 | -1.45037100 | H | -0.53243000 | 5.41953500  | -0.76136200 |
| O | 4.75635100  | -1.18298000 | -1.21597500 | C | 3.80436400  | -0.10193700 | -5.03294900 |
| C | 3.56189100  | -1.02575500 | -0.94897700 | H | 4.50914500  | -0.84017800 | -5.43007500 |
| N | 3.12199000  | -0.53431500 | 0.23302300  | H | 3.44480600  | 0.50018900  | -5.87743000 |
| H | 2.12889200  | -0.53239200 | 0.47968800  | C | 3.20690400  | 1.37382100  | -3.19069200 |
| C | 2.02716000  | 0.37736200  | -3.42574700 | H | 2.92401200  | 2.35562400  | -3.58407500 |
| H | 1.17617100  | 0.87730000  | -3.88859500 | H | 3.42097100  | 1.50199500  | -2.12619400 |
| C | 3.00168200  | -1.87768200 | -3.32117900 | C | 4.42092100  | 0.80619500  | -3.95665600 |
| H | 2.55821000  | -2.83000700 | -3.62234400 | H | 5.05173300  | 1.59457700  | -4.37878900 |
| H | 4.08202000  | -2.01429700 | -3.25693300 | H | 5.04057900  | 0.21352100  | -3.27750100 |
| H | -1.16898500 | 0.99262200  | -1.10151700 | H | -1.06297800 | -1.12839300 | -0.52274500 |
| C | -0.45662800 | -2.59531500 | -1.94217200 | C | -5.70987500 | 1.12038000  | 0.31331200  |
| C | -0.07518600 | -3.76585700 | -1.02212900 | C | -6.81702100 | 0.50211700  | -0.26667900 |
| C | -1.87971300 | -2.78237100 | -2.49339300 | C | -6.64413600 | -0.55636000 | -1.16108900 |
| H | 0.23240400  | -2.55982500 | -2.79137600 | C | -5.35174400 | -0.98455600 | -1.47603000 |
| C | -0.22944700 | -5.11250500 | -1.74016700 | C | -4.25063200 | -0.36723500 | -0.89034100 |
| H | -0.71608800 | -3.73812400 | -0.13432900 | C | -4.40617100 | 0.68707300  | 0.02213900  |
| H | 0.95032400  | -3.65173100 | -0.65486400 | C | -3.21055500 | 1.34000200  | 0.62480800  |
| C | -2.02855200 | -4.12741100 | -3.21540200 | C | -3.18721800 | 2.82240800  | 0.63649200  |
| H | -2.58865700 | -2.74122000 | -1.65664400 | C | -2.50885100 | 3.50852700  | 1.66325100  |
| H | -2.12201300 | -1.95030100 | -3.16515900 | C | -2.44160100 | 4.89936100  | 1.67857300  |
| C | -1.64475900 | -5.29582400 | -2.30006800 | C | -3.05880700 | 5.64733600  | 0.67141600  |
| H | 0.01906100  | -5.92653900 | -1.04928900 | C | -3.74589900 | 4.98326300  | -0.34902500 |
| H | 0.49691600  | -5.16696700 | -2.56444700 | C | -3.81443300 | 3.59078000  | -0.36375300 |
| H | -3.05953900 | -4.23990900 | -3.57137000 | N | -2.15687200 | 0.73511500  | 1.12476800  |
| H | -1.38405300 | -4.13566700 | -4.10633000 | H | -5.85316400 | 1.93890500  | 1.01247000  |
| H | -1.71678100 | -6.24490000 | -2.84499800 | H | -7.81774200 | 0.84330000  | -0.01425100 |
| H | -2.35966800 | -5.35310800 | -1.46689300 | H | -5.20275500 | -1.80154000 | -2.17763300 |
| C | 0.46347400  | 2.28451700  | -1.45774000 | H | -3.25037200 | -0.70427400 | -1.13519700 |
| C | -0.14603200 | 3.24076900  | -2.49036300 | H | -2.02755700 | 2.92363800  | 2.44005600  |
| C | 0.41746000  | 2.87566400  | -0.04869500 | H | -1.91197300 | 5.40301600  | 2.48331600  |
| H | 1.50265500  | 2.09689100  | -1.71207300 | H | -4.22744700 | 5.55229100  | -1.14034700 |
| C | 0.54780400  | 4.60842300  | -2.44558300 | H | -4.34737900 | 3.08871800  | -1.16535900 |
| H | -1.21510700 | 3.36302500  | -2.26742600 | H | -3.01204200 | 6.73279300  | 0.68564900  |
| H | -0.07374200 | 2.80117400  | -3.49297400 | H | -7.50669500 | -1.04089700 | -1.61037000 |
| C | 1.11126400  | 4.24146100  | -0.00750600 | C | -0.65481600 | -0.98670600 | 1.72416700  |
| H | -0.62582600 | 2.98940700  | 0.25086800  | O | -0.55186900 | -2.25374800 | 2.24741700  |
| H | 0.87134100  | 2.17485800  | 0.65417400  | O | 0.37898900  | -0.32605400 | 1.49815300  |
| C | 0.50993800  | 5.20791100  | -1.03493400 | C | 0.77740600  | -2.72648500 | 2.46184500  |
| H | 0.07435000  | 5.28634200  | -3.16622900 | H | 1.36393800  | -2.69730100 | 1.54141500  |
| H | 1.59469400  | 4.49169700  | -2.76270900 | H | 0.67185100  | -3.75955800 | 2.80022900  |
| H | 1.02715900  | 4.65874400  | 1.00202300  | H | 1.29321100  | -2.13905200 | 3.22612700  |
| H | 2.18580700  | 4.11596500  | -0.20325400 | C | -3.23192200 | -2.82462300 | 1.30835100  |
| H | 1.04599300  | 6.16540000  | -1.01797500 | C | -3.15022500 | -1.49304000 | 1.75013400  |

|   |             |             |            |   |             |             |             |
|---|-------------|-------------|------------|---|-------------|-------------|-------------|
| C | -4.22153800 | -1.00925400 | 2.52448300 | O | -4.30888300 | -2.37236300 | 0.85150600  |
| C | -5.32318900 | -1.80635100 | 2.82413800 | C | -3.21891900 | -1.82004600 | 0.67392400  |
| C | -5.38834500 | -3.12442900 | 2.36512000 | N | -2.88094300 | -1.20032600 | -0.47995400 |
| C | -4.32924000 | -3.62994300 | 1.60950000 | H | -1.91892000 | -0.89110900 | -0.65628100 |
| H | -2.42537900 | -3.23368300 | 0.71353000 | C | -2.67613700 | -0.17953900 | 3.43601700  |
| H | -4.18718000 | 0.01328800  | 2.88791000 | H | -2.14819000 | 0.55446000  | 4.04534100  |
| H | -6.13434100 | -1.39671400 | 3.42110800 | C | -2.54409600 | -2.61030500 | 3.03470900  |
| H | -6.25028500 | -3.74560500 | 2.59361000 | H | -1.74771000 | -3.29720200 | 3.33145200  |
| H | -4.35946300 | -4.65360500 | 1.24297800 | H | -3.43762900 | -3.19762200 | 2.81930600  |
| C | -2.00670200 | -0.59640400 | 1.42637200 | H | 0.19124700  | 1.97065400  | 1.71859900  |

### IM5-S

|   |             |             |             |   |             |             |             |
|---|-------------|-------------|-------------|---|-------------|-------------|-------------|
| C | -3.81426800 | -1.18926200 | -1.62068100 | C | 1.01430500  | -1.54959200 | 2.26243500  |
| C | -3.38772600 | -2.22964000 | -2.66121700 | C | 1.48524100  | -2.65026600 | 1.30647000  |
| C | -3.14604300 | -1.91688300 | -4.00128900 | C | 2.19087600  | -0.99163400 | 3.08042000  |
| C | -3.23589200 | -3.56111600 | -2.24390900 | H | 0.26810200  | -1.95297800 | 2.95433100  |
| C | -2.73506000 | -2.90576300 | -4.90071600 | C | 2.23440400  | -3.76026500 | 2.05590400  |
| H | -3.26877100 | -0.89852600 | -4.35109000 | H | 2.14072400  | -2.19814800 | 0.55462100  |
| C | -2.82575100 | -4.54725700 | -3.13783900 | H | 0.62973300  | -3.06956600 | 0.76491600  |
| H | -3.44431100 | -3.82180600 | -1.21034700 | C | 2.93002500  | -2.10513900 | 3.83283700  |
| C | -2.56620200 | -4.22091300 | -4.47268200 | H | 2.88666300  | -0.49760600 | 2.38830900  |
| H | -2.54276900 | -2.63961300 | -5.93660400 | H | 1.82432900  | -0.22594800 | 3.77538800  |
| H | -2.71094600 | -5.57220800 | -2.79502900 | C | 3.40571500  | -3.19992000 | 2.87147600  |
| H | -2.24128300 | -4.98780400 | -5.17036400 | H | 2.59240500  | -4.50666600 | 1.33672600  |
| C | -4.02954200 | 0.20566800  | -2.17907600 | H | 1.53849600  | -4.28141300 | 2.73040600  |
| C | -5.33449100 | 0.69254700  | -2.30781600 | H | 3.77828400  | -1.67820300 | 4.38115100  |
| C | -2.96133600 | 1.00394400  | -2.61312100 | H | 2.25662800  | -2.54399400 | 4.58378000  |
| C | -5.57736800 | 1.94910100  | -2.86717500 | H | 3.89975800  | -4.00564400 | 3.42835100  |
| H | -6.16831200 | 0.07968100  | -1.97373400 | H | 4.15420200  | -2.78105600 | 2.18556600  |
| C | -3.20270900 | 2.26094400  | -3.16694200 | C | -1.86706500 | 2.46502800  | 1.83771600  |
| H | -1.94339800 | 0.64298800  | -2.50807700 | C | -1.39222700 | 3.87847000  | 2.18742400  |
| C | -4.51018000 | 2.73629100  | -3.30164100 | C | -2.52736600 | 2.40683400  | 0.45750600  |
| H | -6.59793900 | 2.31023900  | -2.96106900 | H | -2.59709100 | 2.16566400  | 2.58990400  |
| H | -2.36549100 | 2.87179700  | -3.49413900 | C | -2.54566600 | 4.88362300  | 2.08409300  |
| H | -4.69411600 | 3.71451300  | -3.73774800 | H | -0.59429600 | 4.16612600  | 1.49228600  |
| H | -4.76109800 | -1.52722400 | -1.19392300 | H | -0.96217100 | 3.88336600  | 3.19695700  |
| C | -2.79838200 | -1.55650100 | 4.14902100  | C | -3.68237000 | 3.41056700  | 0.37157600  |
| H | -2.03685300 | -1.65344100 | 4.92787800  | H | -1.77189500 | 2.62899200  | -0.30497500 |
| N | -0.71269700 | 1.55264600  | 1.93057900  | H | -2.88302200 | 1.39181400  | 0.26283900  |
| N | 0.37826300  | -0.44357200 | 1.52175800  | C | -3.20982200 | 4.83107800  | 0.70221200  |
| N | -1.83891300 | -0.47318200 | 2.25884500  | H | -2.17163300 | 5.89265400  | 2.29511000  |
| C | -0.72847300 | 0.21509600  | 1.91019500  | H | -3.29622200 | 4.65792600  | 2.85551600  |
| C | -2.12041200 | -1.83603500 | 1.77344800  | H | -4.12470100 | 3.37254700  | -0.62826900 |
| H | -1.22802500 | -2.24839900 | 1.30840600  | H | -4.47319300 | 3.11725200  | 1.07783700  |
|   |             |             |             | H | -4.05084900 | 5.53415500  | 0.66019200  |
|   |             |             |             | H | -2.48515900 | 5.15438100  | -0.05879800 |



|   |             |             |             |   |             |             |             |
|---|-------------|-------------|-------------|---|-------------|-------------|-------------|
| C | 3.52734500  | -1.16918400 | -0.26993200 | H | 5.30281000  | -2.50802900 | -4.28875100 |
| N | 2.90069500  | -0.41165200 | 0.66178800  | H | 4.47295300  | -1.36870100 | -5.35721900 |
| H | 1.88608600  | -0.41771600 | 0.71434200  | C | 3.84840700  | 0.38412800  | -3.22085100 |
| C | 2.63548900  | -0.59384400 | -3.32751400 | H | 3.74012700  | 1.17237100  | -3.97366900 |
| H | 1.93722100  | -0.24416200 | -4.08835100 | H | 3.88205000  | 0.87526900  | -2.24492900 |
| C | 3.33471800  | -2.71706600 | -2.31262200 | C | 5.11618800  | -0.45396000 | -3.48986200 |
| H | 2.87217000  | -3.70531800 | -2.37716000 | H | 5.89496000  | 0.11420000  | -4.00967400 |
| H | 4.36680600  | -2.84962400 | -1.98326900 | H | 5.53403700  | -0.80066200 | -2.54029100 |
| H | -0.84055900 | 0.85172100  | -2.38043200 | H | -2.04082800 | -1.02110300 | 0.04676200  |
| C | -0.32110800 | -2.83659800 | -1.78538900 | C | -5.40021100 | 1.01541600  | -0.47999000 |
| C | -0.47971700 | -3.52907000 | -0.41955000 | C | -6.36393100 | 0.34487000  | -1.23142700 |
| C | -1.40266500 | -3.36520000 | -2.74747600 | C | -5.97470900 | -0.52673100 | -2.25102400 |
| H | 0.64663600  | -3.13695100 | -2.21337500 | C | -4.61774300 | -0.72777900 | -2.50999300 |
| C | -0.40714600 | -5.05554100 | -0.54074900 | C | -3.64988500 | -0.07390000 | -1.74675200 |
| H | -1.45268100 | -3.24785300 | 0.00195900  | C | -4.03655600 | 0.80032900  | -0.72257200 |
| H | 0.27864800  | -3.16170900 | 0.28170400  | C | -3.02571500 | 1.48047100  | 0.14892900  |
| C | -1.34711300 | -4.89218100 | -2.88448900 | C | -2.98311200 | 2.96911500  | 0.12661500  |
| H | -2.38666400 | -3.06033100 | -2.36439300 | C | -2.35508000 | 3.66828300  | 1.17056500  |
| H | -1.28083200 | -2.88382500 | -3.72592700 | C | -2.23552500 | 5.05299100  | 1.12207500  |
| C | -1.46434100 | -5.58226900 | -1.51935900 | C | -2.73568900 | 5.76417900  | 0.02563900  |
| H | -0.53645400 | -5.51741900 | 0.44630200  | C | -3.36885500 | 5.07975700  | -1.01212000 |
| H | 0.59260800  | -5.34689100 | -0.89541900 | C | -3.50006500 | 3.69119800  | -0.95906000 |
| H | -2.14175400 | -5.23955400 | -3.55714400 | N | -2.20087400 | 0.88372000  | 0.93129500  |
| H | -0.39360800 | -5.17840900 | -3.35235000 | H | -5.70185500 | 1.69153700  | 0.31447700  |
| H | -1.37341000 | -6.67009800 | -1.63202200 | H | -7.41790700 | 0.50411000  | -1.02159700 |
| H | -2.46401900 | -5.38989400 | -1.10299100 | H | -4.30638900 | -1.40163200 | -3.30353900 |
| C | 0.94948300  | 1.91486600  | -2.09385300 | H | -2.59809000 | -0.27967400 | -1.92517100 |
| C | 1.11101200  | 2.73870800  | -3.38030700 | H | -1.95637000 | 3.10423000  | 2.00628100  |
| C | 0.31146400  | 2.76403400  | -0.98737100 | H | -1.75020500 | 5.58189400  | 1.93774700  |
| H | 1.93098100  | 1.58328500  | -1.75038800 | H | -3.76077000 | 5.62471700  | -1.86629000 |
| C | 1.89555700  | 4.03401300  | -3.13848100 | H | -3.98522900 | 3.16457200  | -1.77404300 |
| H | 0.10807000  | 2.98424000  | -3.76053500 | H | -2.63550700 | 6.84520300  | -0.01449500 |
| H | 1.59816800  | 2.12751800  | -4.14828200 | H | -6.72580900 | -1.04537700 | -2.84044400 |
| C | 1.10631800  | 4.05146600  | -0.74165400 | C | -0.96895100 | -0.99310300 | 1.80342800  |
| H | -0.70967400 | 3.02684000  | -1.29159700 | O | -1.17145300 | -2.01252700 | 2.64102600  |
| H | 0.22735900  | 2.17412800  | -0.06933500 | O | 0.12420100  | -0.48829300 | 1.62199600  |
| C | 1.25360100  | 4.87299900  | -2.02667300 | C | 0.00220500  | -2.49979900 | 3.32678000  |
| H | 1.96312900  | 4.61118800  | -4.06949000 | H | 0.71030100  | -2.92128700 | 2.61159200  |
| H | 2.92613500  | 3.78262600  | -2.84844900 | H | -0.35947400 | -3.27273400 | 4.00481100  |
| H | 0.61351800  | 4.64348200  | 0.03724400  | H | 0.48066100  | -1.69183300 | 3.88210300  |
| H | 2.10188400  | 3.79450800  | -0.35720900 | C | -4.17970600 | -2.17445600 | 0.98504900  |
| H | 1.85059700  | 5.77461600  | -1.83739600 | C | -3.51575500 | -1.11674600 | 1.61085800  |
| H | 0.25941900  | 5.21219700  | -2.35367400 | C | -4.07628100 | -0.54178600 | 2.75764000  |
| C | 4.61290700  | -1.65679100 | -4.30655500 | C | -5.28574100 | -1.01454900 | 3.26391200  |

|   |             |             |            |   |             |             |            |
|---|-------------|-------------|------------|---|-------------|-------------|------------|
| C | -5.94759000 | -2.07027200 | 2.63062200 | N | -2.71542800 | -1.40574600 | 0.52783700 |
| C | -5.38991800 | -2.65081100 | 1.49091800 | H | -2.10692100 | -0.72867400 | 0.07680800 |
| H | -3.75651300 | -2.61332100 | 0.08662900 | C | -3.59973300 | 1.84663800  | 2.13670600 |
| H | -3.56620900 | 0.28394600  | 3.24602300 | H | -3.43127600 | 2.90980300  | 1.98062900 |
| H | -5.71391900 | -0.55925400 | 4.15304700 | C | -2.98328200 | 0.23957200  | 3.89896800 |
| H | -6.89302300 | -2.43517500 | 3.02276600 | H | -2.22326500 | 0.44685500  | 4.65726300 |
| H | -5.90025800 | -3.46744900 | 0.98744900 | H | -3.57305900 | -0.61326500 | 4.24014300 |
| C | -2.22108000 | -0.57733700 | 1.03527900 | H | -0.66747500 | 3.38882700  | 0.24976400 |

**IM6-S**

|   |             |             |             |   |             |             |             |
|---|-------------|-------------|-------------|---|-------------|-------------|-------------|
| C | -2.96878200 | -2.66855600 | -0.15593200 | C | 0.48401700  | 1.14346600  | 2.95845200  |
| C | -1.83139900 | -3.66512000 | 0.06285000  | C | 1.21244900  | -0.19421200 | 2.72351500  |
| C | -0.49534900 | -3.25018700 | 0.11614600  | C | 1.44458800  | 2.14539600  | 3.62840900  |
| C | -2.11967200 | -5.02568700 | 0.21330100  | H | -0.32880200 | 0.97895400  | 3.68067700  |
| C | 0.53174400  | -4.17617800 | 0.30128100  | C | 1.81410000  | -0.76099400 | 4.01455700  |
| H | -0.25306800 | -2.19896400 | 0.03023800  | H | 2.00846000  | -0.02643300 | 1.99016100  |
| C | -1.09442500 | -5.95695200 | 0.39162700  | H | 0.53912300  | -0.92855500 | 2.26477700  |
| H | -3.15522300 | -5.35707400 | 0.19691100  | C | 2.04751300  | 1.58833500  | 4.92382300  |
| C | 0.23558900  | -5.53468300 | 0.43360200  | H | 2.24196200  | 2.38988300  | 2.91448300  |
| H | 1.56046900  | -3.82968200 | 0.34607800  | H | 0.90188100  | 3.07863100  | 3.82423100  |
| H | -1.33739900 | -7.00961700 | 0.50963200  | C | 2.75553400  | 0.24907800  | 4.68286400  |
| H | 1.03407900  | -6.25718200 | 0.57919300  | H | 2.34719800  | -1.69504700 | 3.79748200  |
| C | -3.31790700 | -2.43583200 | -1.62623900 | H | 1.00354600  | -1.01733900 | 4.71257000  |
| C | -3.13259300 | -3.44311600 | -2.58105700 | H | 2.74454300  | 2.31671900  | 5.35786900  |
| C | -3.88776300 | -1.22491500 | -2.03857800 | H | 1.24665200  | 1.44293800  | 5.66379600  |
| C | -3.49348900 | -3.24089300 | -3.91437600 | H | 3.13942200  | -0.15540000 | 5.62811300  |
| H | -2.69137200 | -4.38953000 | -2.28731700 | H | 3.62812500  | 0.41348300  | 4.03368000  |
| C | -4.24891700 | -1.01972400 | -3.37057800 | C | -2.36598000 | 2.69610800  | -0.75559000 |
| H | -4.04838900 | -0.43519400 | -1.31329200 | C | -3.48551400 | 3.74909300  | -0.79629800 |
| C | -4.04849000 | -2.02582100 | -4.31778800 | C | -1.53539700 | 2.80030200  | -2.04421400 |
| H | -3.33465500 | -4.03583500 | -4.63811700 | H | -2.81189500 | 1.69835900  | -0.70412800 |
| H | -4.68780500 | -0.07093700 | -3.66672300 | C | -4.38150400 | 3.56063600  | -2.02807100 |
| H | -4.32570700 | -1.86577800 | -5.35603000 | H | -3.02141000 | 4.74582800  | -0.82451100 |
| H | -3.85380300 | -3.08892100 | 0.33321800  | H | -4.08416100 | 3.70820100  | 0.11727800  |
| C | -3.84990100 | 1.49731900  | 3.63843500  | C | -2.40539900 | 2.61122900  | -3.29281600 |
| H | -3.52436600 | 2.31536000  | 4.28704500  | H | -1.06206000 | 3.79329300  | -2.07470900 |
| N | -1.50843200 | 2.85197000  | 0.43110300  | H | -0.73259100 | 2.06492600  | -2.02724900 |
| N | 0.01826800  | 1.72994700  | 1.71069300  | C | -3.56865600 | 3.60937000  | -3.32797600 |
| N | -2.35430800 | 1.13842900  | 1.76909400  | H | -5.16862200 | 4.32491400  | -2.04109600 |
| C | -1.22201800 | 1.85294500  | 1.35755200  | H | -4.89070200 | 2.58835900  | -1.95375200 |
| C | -2.30149900 | -0.09314700 | 2.55969000  | H | -1.78758800 | 2.71217800  | -4.19407400 |
| H | -1.27222000 | -0.40995000 | 2.69548500  | H | -2.80064000 | 1.58611300  | -3.29736700 |
| O | -3.54037000 | -2.17451700 | 2.50056200  | H | -4.21690400 | 3.41073100  | -4.19108400 |
| C | -2.94312900 | -1.30731400 | 1.85969300  | H | -3.16710800 | 4.62438600  | -3.46118600 |
|   |             |             |             | C | -5.36346800 | 1.25411000  | 3.74550100  |
|   |             |             |             | H | -5.63072700 | 0.64518800  | 4.61586400  |

|   |             |             |             |                      |             |             |             |
|---|-------------|-------------|-------------|----------------------|-------------|-------------|-------------|
| H | -5.88744600 | 2.21483100  | 3.84007300  | H                    | 2.52354400  | 0.51358900  | -3.58214900 |
| C | -4.87937200 | 1.37649100  | 1.38427400  | H                    | 1.68229100  | 2.89340500  | -0.11621000 |
| H | -5.43588600 | 2.25890900  | 1.04947500  | H                    | 2.40876500  | 4.93625200  | -1.33612200 |
| H | -4.63196900 | 0.79287500  | 0.49504700  | H                    | 3.18039800  | 4.76192800  | -3.69577200 |
| C | -5.72488500 | 0.59369200  | 2.40623700  | H                    | 3.22637800  | 2.54297300  | -4.81679200 |
| H | -6.79660200 | 0.63512700  | 2.18454100  | C                    | 1.63256900  | 0.34372500  | -0.97584500 |
| H | -5.43468600 | -0.46178500 | 2.42156900  | H                    | 1.24873100  | 0.68614100  | -0.00763400 |
| C | 4.30915000  | 1.51778600  | 0.98011400  |                      |             |             |             |
| C | 4.88209300  | 2.77624300  | 1.16569700  | <b>N<sub>2</sub></b> |             |             |             |
| C | 5.63131000  | 3.35944200  | 0.14355500  | N                    | 0.00000000  | 0.00000000  | 0.55254500  |
| C | 5.82571200  | 2.66835000  | -1.05521900 | N                    | 0.00000000  | 0.00000000  | -0.55254500 |
| C | 5.26898200  | 1.40339000  | -1.23381700 |                      |             |             |             |
| C | 4.48262200  | 0.83240900  | -0.22612800 | <b>P-R</b>           |             |             |             |
| C | 3.83854500  | -0.50715400 | -0.43154400 | H                    | -1.69110300 | 0.79055700  | 0.96304400  |
| C | 4.69357000  | -1.71234500 | -0.22494100 | C                    | -5.30766600 | 1.43031500  | -0.02464200 |
| C | 4.24701700  | -2.97102200 | -0.66449200 | C                    | -6.06680600 | 1.94316800  | 1.02540800  |
| C | 5.01640300  | -4.10884800 | -0.44795200 | C                    | -5.88148200 | 1.46340400  | 2.32414100  |
| C | 6.24780700  | -4.01070300 | 0.20974800  | C                    | -4.93700300 | 0.46472400  | 2.56804200  |
| C | 6.70308700  | -2.76529900 | 0.64223900  | C                    | -4.16802900 | -0.04247200 | 1.51946300  |
| C | 5.93438200  | -1.62108600 | 0.42173800  | C                    | -4.34221500 | 0.44501500  | 0.21892400  |
| N | 2.61564400  | -0.71418100 | -0.75200100 | C                    | -3.46770900 | -0.03669600 | -0.89866600 |
| H | 3.72141900  | 1.06773300  | 1.77098400  | C                    | -4.07920800 | -0.90900600 | -1.93734700 |
| H | 4.73597300  | 3.30073700  | 2.10603200  | C                    | -3.37571700 | -1.19126400 | -3.12119000 |
| H | 6.41030800  | 3.11627600  | -1.85373800 | C                    | -3.93535200 | -2.00907900 | -4.09632200 |
| H | 5.41672700  | 0.86856200  | -2.16673500 | C                    | -5.20582400 | -2.56399800 | -3.90577600 |
| H | 3.29344900  | -3.03229100 | -1.17707900 | C                    | -5.91097000 | -2.29191100 | -2.73353000 |
| H | 4.66076600  | -5.07475200 | -0.79625100 | C                    | -5.35296700 | -1.46796600 | -1.75526400 |
| H | 7.65810100  | -2.68056300 | 1.15324200  | N                    | -2.22882800 | 0.27692900  | -1.02582300 |
| H | 6.29342900  | -0.65693100 | 0.76540200  | H                    | -5.44116700 | 1.81140700  | -1.03235100 |
| H | 6.84735600  | -4.90067600 | 0.37995800  | H                    | -6.80067300 | 2.71985400  | 0.83023000  |
| H | 6.06709300  | 4.34527900  | 0.27999300  | H                    | -4.79644900 | 0.07985700  | 3.57420300  |
| C | 0.43928600  | -0.32052000 | -1.66025100 | H                    | -3.43114100 | -0.81800400 | 1.70895800  |
| O | 0.79199600  | -1.01409400 | -2.74378400 | H                    | -2.39173400 | -0.75555000 | -3.25621500 |
| O | -0.71449900 | -0.22416700 | -1.27464100 | H                    | -3.38334000 | -2.21569000 | -5.00915000 |
| C | -0.27266600 | -1.68710600 | -3.44923500 | H                    | -6.89721700 | -2.71994900 | -2.57721000 |
| H | -0.64151100 | -2.51799900 | -2.84869500 | H                    | -5.90702300 | -1.26216500 | -0.84589600 |
| H | 0.17834300  | -2.05331400 | -4.37170700 | H                    | -5.64169400 | -3.20226500 | -4.66944100 |
| H | -1.08849000 | -0.99559600 | -3.66399800 | H                    | -6.47370700 | 1.86419400  | 3.14199400  |
| C | 2.49146900  | 1.48247000  | -3.09554200 | C                    | -0.10695400 | 1.28488100  | -0.32257000 |
| C | 2.06010500  | 1.57608300  | -1.76696200 | O                    | 0.17849500  | 1.38772300  | -1.62846300 |
| C | 2.02103000  | 2.82884300  | -1.14556400 | O                    | 0.72613900  | 1.33283200  | 0.56085200  |
| C | 2.42796900  | 3.97086000  | -1.83456000 | C                    | 1.56709000  | 1.59271100  | -1.94829400 |
| C | 2.86370000  | 3.87267800  | -3.15753200 | H                    | 1.92175700  | 2.53614200  | -1.52406200 |
| C | 2.89052700  | 2.62602900  | -3.78653500 | H                    | 1.61391900  | 1.62457500  | -3.03725100 |

|   |             |            |             |   |             |             |            |
|---|-------------|------------|-------------|---|-------------|-------------|------------|
| H | 2.17565100  | 0.76927300 | -1.56541600 | H | -3.36017200 | 0.25088900  | 5.28638000 |
| C | -2.50531300 | 3.23627400 | 1.11677200  | H | -3.77416900 | -1.44622700 | 4.87889000 |
| C | -2.19269600 | 2.58749500 | -0.08020300 | H | -4.71058800 | -0.09388600 | 4.16789800 |
| C | -2.42935000 | 3.23649700 | -1.29797800 | C | 0.17191400  | 2.27728400  | 2.32034900 |
| C | -2.99140500 | 4.51223100 | -1.31360500 | C | -0.21002100 | 0.93419200  | 2.23458300 |
| C | -3.31410200 | 5.15338900 | -0.11455800 | C | 0.63318000  | -0.05430500 | 2.75034000 |
| C | -3.06628900 | 4.51374400 | 1.10092400  | C | 1.85329200  | 0.29202800  | 3.33355100 |
| H | -2.33281000 | 2.72827200 | 2.06107200  | C | 2.23488700  | 1.63270700  | 3.40999800 |
| H | -2.18346200 | 2.73506800 | -2.22837700 | C | 1.39086800  | 2.62389000  | 2.90230900 |
| H | -3.17822200 | 5.00684600 | -2.26298600 | H | -0.48885400 | 3.04169900  | 1.92522700 |
| H | -3.75642800 | 6.14570800 | -0.12889100 | H | 0.33365100  | -1.09783900 | 2.69209900 |
| H | -3.31827800 | 5.00332000 | 2.03756100  | H | 2.50529000  | -0.48443200 | 3.72432400 |
| C | -1.60768400 | 1.17745600 | -0.05615500 | H | 3.18494900  | 1.90453400  | 3.86185300 |

|   |             |            |            |
|---|-------------|------------|------------|
| H | 1.68202700  | 3.66917800 | 2.96158600 |
| C | -1.56433800 | 0.55549100 | 1.65390600 |

**P-S**

|   |             |             |             |
|---|-------------|-------------|-------------|
| H | -1.54504200 | -0.50245000 | 1.37839100  |
| C | -5.17931700 | 0.51628600  | 0.90588400  |
| C | -6.07739700 | -0.47044800 | 1.31265100  |
| C | -5.80738500 | -1.81557100 | 1.05069800  |
| C | -4.63858200 | -2.17125000 | 0.37511200  |
| C | -3.73446500 | -1.18718000 | -0.02490200 |
| C | -3.99548700 | 0.16203200  | 0.24527000  |
| C | -2.99593300 | 1.21853600  | -0.12140100 |
| C | -3.31260500 | 2.10979100  | -1.26863300 |
| C | -2.52306900 | 3.24522200  | -1.51998400 |
| C | -2.80686500 | 4.07819900  | -2.59624900 |
| C | -3.88370800 | 3.79247600  | -3.44290700 |
| C | -4.67314300 | 2.66799900  | -3.20274700 |
| C | -4.39236200 | 1.83279300  | -2.12092500 |
| N | -1.88976000 | 1.39841900  | 0.50576800  |
| H | -5.38250100 | 1.56184200  | 1.11466600  |
| H | -6.98870700 | -0.18793500 | 1.83227400  |
| H | -4.42870000 | -3.21529700 | 0.16048100  |
| H | -2.82422900 | -1.46299400 | -0.54997500 |
| H | -1.69169500 | 3.45794000  | -0.85733800 |
| H | -2.19138500 | 4.95527400  | -2.77629400 |
| H | -5.50969600 | 2.43816000  | -3.85663200 |
| H | -5.01038800 | 0.95946500  | -1.94244800 |
| H | -4.10426600 | 4.44530400  | -4.28295600 |
| H | -6.50811400 | -2.58298700 | 1.36735800  |
| C | -2.59586700 | 0.71331500  | 2.78053500  |
| O | -2.80472500 | -0.45980100 | 3.39905600  |
| O | -3.11729200 | 1.75935000  | 3.10324000  |
| C | -3.72530900 | -0.42262100 | 4.50679100  |

**Rh<sub>2</sub>(esp)<sub>2</sub>**

|    |             |             |             |
|----|-------------|-------------|-------------|
| Rh | -0.59591100 | -1.03330100 | -0.10063400 |
| C  | 1.93160500  | -1.00074700 | -1.50948800 |
| C  | 3.07141500  | -1.56853600 | -2.35913300 |
| C  | 4.34017900  | -1.59075000 | -1.48236900 |
| H  | 4.60035200  | -0.58657000 | -1.13532000 |
| H  | 5.18238400  | -1.98890800 | -2.05933200 |
| H  | 4.19617200  | -2.23394200 | -0.60623000 |
| C  | 2.74570000  | -2.98953200 | -2.83318200 |
| H  | 2.61677200  | -3.66585400 | -1.98263900 |
| H  | 3.57182800  | -3.36659600 | -3.44668300 |
| H  | 1.83098600  | -3.01940600 | -3.42993800 |
| O  | 0.92421700  | -1.74477600 | -1.28215000 |
| O  | -0.43633700 | 1.68970400  | -1.56063400 |
| C  | -0.23442200 | 0.04674400  | -5.94256700 |
| H  | -1.13268700 | 0.21013200  | -6.53214800 |
| C  | 0.02822200  | 0.86842800  | -4.83872700 |
| C  | -0.94143500 | 1.94341100  | -4.40448700 |
| H  | -1.49550100 | 2.32509500  | -5.26978600 |
| H  | -0.38908100 | 2.78383300  | -3.97306300 |
| C  | -2.00078300 | 1.47328200  | -3.35885300 |
| C  | -2.94184800 | 0.42368000  | -3.96135900 |
| H  | -2.40161700 | -0.47079900 | -4.28061600 |
| H  | -3.45172900 | 0.84927600  | -4.83318700 |
| H  | -3.70276900 | 0.11846100  | -3.23676400 |
| C  | -2.81481200 | 2.69782700  | -2.89312700 |
| H  | -3.55770900 | 2.40733500  | -2.14092100 |
| H  | -3.34788000 | 3.13455700  | -3.74521500 |

|   |             |             |             |                                        |             |             |             |
|---|-------------|-------------|-------------|----------------------------------------|-------------|-------------|-------------|
| H | -2.16601300 | 3.46440400  | -2.45953800 | C                                      | -1.93160500 | 1.00074700  | 1.50948800  |
| C | -1.26777900 | 0.91372400  | -2.13700700 | C                                      | -3.07141500 | 1.56853600  | 2.35913300  |
| O | -1.53314700 | -0.27350600 | -1.76401500 | C                                      | -4.34017900 | 1.59075000  | 1.48236900  |
| O | 2.07426600  | 0.18794400  | -1.07062700 | H                                      | -4.60035200 | 0.58657000  | 1.13532000  |
| C | 3.31576600  | -0.61697500 | -3.57189700 | H                                      | -5.18238400 | 1.98890800  | 2.05933200  |
| H | 3.68558400  | 0.33774300  | -3.18517600 | H                                      | -4.19617200 | 2.23394200  | 0.60623000  |
| H | 4.11952200  | -1.06295900 | -4.16887400 | C                                      | -2.74570000 | 2.98953200  | 2.83318200  |
| C | 2.09737400  | -0.37730900 | -4.43425800 | H                                      | -2.61677200 | 3.66585400  | 1.98263900  |
| C | 1.81083400  | -1.18659500 | -5.54155100 | H                                      | -3.57182800 | 3.36659600  | 3.44668300  |
| H | 2.49870200  | -1.98100400 | -5.81922700 | H                                      | -1.83098600 | 3.01940600  | 3.42993800  |
| C | 0.65529700  | -0.96965000 | -6.29402000 | Rh                                     | 0.59591100  | 1.03330100  | 0.10063400  |
| H | 0.44834800  | -1.59328800 | -7.15976700 |                                        |             |             |             |
| C | 1.20495200  | 0.65227700  | -4.11133100 |                                        |             |             |             |
| H | 1.42726900  | 1.29625300  | -3.26767400 | <b>Rh<sub>2</sub>(OAc)<sub>4</sub></b> |             |             |             |
| O | -2.07426600 | -0.18794400 | 1.07062700  | Rh                                     | -0.58200000 | -1.04257600 | -0.09915900 |
| C | -3.31576600 | 0.61697500  | 3.57189700  | C                                      | 1.92816300  | -0.94294800 | -1.54194200 |
| H | -3.68558400 | -0.33774300 | 3.18517600  | C                                      | 3.05978000  | -1.50101500 | -2.36236300 |
| H | -4.11952200 | 1.06295900  | 4.16887400  | O                                      | 0.94234500  | -1.71672800 | -1.30475800 |
| C | -2.09737400 | 0.37730900  | 4.43425800  | O                                      | -0.44383100 | 1.68785100  | -1.56681000 |
| C | -1.81083400 | 1.18659500  | 5.54155100  | C                                      | -1.98357000 | 1.43065300  | -3.35129200 |
| H | -2.49870200 | 1.98100400  | 5.81922700  | C                                      | -1.27219700 | 0.90257800  | -2.13439400 |
| C | -0.65529700 | 0.96965000  | 6.29402000  | O                                      | -1.54096800 | -0.28379800 | -1.75491200 |
| H | -0.44834800 | 1.59328800  | 7.15976700  | O                                      | 2.04790800  | 0.25211600  | -1.11527200 |
| C | -1.20495200 | -0.65227700 | 4.11133100  | O                                      | -2.04790800 | -0.25211600 | 1.11527200  |
| H | -1.42726900 | -1.29625300 | 3.26767400  | O                                      | 1.54096800  | 0.28379800  | 1.75491200  |
| O | 1.53314700  | 0.27350600  | 1.76401500  | O                                      | 0.44383100  | -1.68785100 | 1.56681000  |
| O | 0.43633700  | -1.68970400 | 1.56063400  | C                                      | 1.98357000  | -1.43065300 | 3.35129200  |
| C | 0.23442200  | -0.04674400 | 5.94256700  | C                                      | 1.27219700  | -0.90257800 | 2.13439400  |
| H | 1.13268700  | -0.21013200 | 6.53214800  | O                                      | -0.94234500 | 1.71672800  | 1.30475800  |
| C | -0.02822200 | -0.86842800 | 4.83872700  | C                                      | -1.92816300 | 0.94294800  | 1.54194200  |
| C | 0.94143500  | -1.94341100 | 4.40448700  | C                                      | -3.05978000 | 1.50101500  | 2.36236300  |
| H | 1.49550100  | -2.32509500 | 5.26978600  | Rh                                     | 0.58200000  | 1.04257600  | 0.09915900  |
| H | 0.38908100  | -2.78383300 | 3.97306300  | H                                      | -1.24487800 | 1.71134600  | -4.10953500 |
| C | 2.00078300  | -1.47328200 | 3.35885300  | H                                      | -2.66638300 | 0.68424400  | -3.76025000 |
| C | 2.94184800  | -0.42368000 | 3.96135900  | H                                      | -2.54116200 | 2.33442700  | -3.08317100 |
| H | 2.40161700  | 0.47079900  | 4.28061600  | H                                      | 3.60141000  | -0.69819800 | -2.86706600 |
| H | 3.45172900  | -0.84927600 | 4.83318700  | H                                      | 2.68457700  | -2.22471500 | -3.08963400 |
| H | 3.70276900  | -0.11846100 | 3.23676400  | H                                      | 3.75526500  | -2.01928500 | -1.69064700 |
| C | 2.81481200  | -2.69782700 | 2.89312700  | H                                      | 2.66638300  | -0.68424400 | 3.76025000  |
| H | 3.55770900  | -2.40733500 | 2.14092100  | H                                      | 2.54116200  | -2.33442700 | 3.08317100  |
| H | 3.34788000  | -3.13455700 | 3.74521500  | H                                      | 1.24487800  | -1.71134600 | 4.10953500  |
| H | 2.16601300  | -3.46440400 | 2.45953800  | H                                      | -2.68457700 | 2.22471500  | 3.08963400  |
| C | 1.26777900  | -0.91372400 | 2.13700700  | H                                      | -3.60141000 | 0.69819800  | 2.86706600  |
| O | -0.92421700 | 1.74477600  | 1.28215000  | H                                      | -3.75526500 | 2.01928500  | 1.69064700  |



**Rh-IM-R**

|   |             |             |             |   |             |             |             |
|---|-------------|-------------|-------------|---|-------------|-------------|-------------|
|   |             |             |             | C | 5.72854600  | -0.00301700 | -0.76153500 |
| C | -5.39730400 | 1.49071300  | -0.41321000 | C | 6.74556600  | 0.56730700  | 0.21667500  |
| C | -6.73867300 | 1.23826600  | -0.68084100 | C | 7.77738000  | 1.40558600  | -0.22822600 |
| C | -7.68897400 | 2.25114600  | -0.52321400 | C | 6.59589600  | 0.34310300  | 1.58841000  |
| C | -7.28384900 | 3.51186000  | -0.07929100 | C | 8.64391900  | 2.00688900  | 0.68392900  |
| C | -5.94168200 | 3.75659000  | 0.20915200  | H | 7.90417500  | 1.58296100  | -1.29335500 |
| C | -4.97296500 | 2.75016500  | 0.04311300  | C | 7.46604900  | 0.94057200  | 2.50399400  |
| C | -3.55243400 | 3.00262700  | 0.39450500  | H | 5.78658300  | -0.29005600 | 1.93560200  |
| C | -3.31914500 | 3.98608600  | 1.49028900  | C | 8.48995500  | 1.77517000  | 2.05456300  |
| C | -3.93545600 | 3.84709600  | 2.74499000  | H | 9.44055700  | 2.65419100  | 0.32726400  |
| C | -3.73094000 | 4.79635300  | 3.74542700  | H | 7.33662700  | 0.75894000  | 3.56744600  |
| C | -2.93495300 | 5.91979200  | 3.49717600  | H | 9.16472700  | 2.24413100  | 2.76533300  |
| C | -2.33023400 | 6.07572500  | 2.24879100  | C | 6.30975300  | -0.80445900 | -1.91608100 |
| C | -2.51167400 | 5.10920200  | 1.25757800  | C | 5.57027500  | -0.98080800 | -3.09277500 |
| N | -2.49137500 | 2.46869800  | -0.14659500 | C | 7.54382300  | -1.45542400 | -1.79341600 |
| H | -4.66648700 | 0.70673200  | -0.54618900 | C | 6.05349300  | -1.78795800 | -4.12383200 |
| H | -7.03796900 | 0.24933100  | -1.01513300 | H | 4.60472200  | -0.49582500 | -3.19263100 |
| H | -8.01377000 | 4.30778000  | 0.04306100  | C | 8.02502800  | -2.26899200 | -2.82051100 |
| H | -5.63847800 | 4.73901200  | 0.55642000  | H | 8.13100200  | -1.32793200 | -0.89030000 |
| H | -4.57180400 | 2.98716000  | 2.93161900  | C | 7.28236100  | -2.43799100 | -3.99077400 |
| H | -4.20085000 | 4.66625000  | 4.71649600  | H | 5.46568400  | -1.91282000 | -5.02911700 |
| H | -1.71289200 | 6.94696000  | 2.04658600  | H | 8.98305800  | -2.76839400 | -2.70497100 |
| H | -2.04350700 | 5.22832800  | 0.28500200  | H | 7.65803400  | -3.06875600 | -4.79158100 |
| H | -2.79031900 | 6.66744000  | 4.27208700  | H | 5.05734400  | -0.66043300 | -0.20176800 |
| H | -8.73533600 | 2.05854900  | -0.74421300 | C | 4.12715400  | 5.10401200  | -0.03152300 |
| C | -1.46302500 | 0.80498300  | -1.52787000 | H | 3.75544100  | 6.04347700  | -0.44905800 |
| O | -1.28233200 | 0.39974600  | -2.82647900 | N | 0.24218300  | 3.12648600  | 0.90503200  |
| O | -0.69554200 | 0.37616400  | -0.61223900 | N | 0.49301200  | 3.13811400  | -1.37369600 |
| C | -0.16539500 | -0.44005100 | -3.11648200 | N | 2.37913900  | 3.49356100  | -0.04634300 |
| H | 0.72103000  | -0.12748500 | -2.56098000 | C | 1.04498400  | 3.25857900  | -0.14409500 |
| H | 0.00503400  | -0.33787000 | -4.19180400 | C | 3.33626600  | 2.95643000  | -1.00722200 |
| H | -0.38801900 | -1.47753900 | -2.87140200 | H | 2.84918200  | 2.71595900  | -1.95094700 |
| C | -3.70849400 | 3.53172100  | -2.67171500 | O | 3.52682000  | 1.09919200  | 0.55694700  |
| C | -3.35465200 | 2.17971900  | -2.48685400 | C | 3.92128000  | 1.63019900  | -0.47633700 |
| C | -3.88436500 | 1.24930800  | -3.40111500 | N | 4.88364800  | 1.08618500  | -1.26696600 |
| C | -4.69983500 | 1.64964200  | -4.45775900 | H | 5.26313900  | 1.64500400  | -2.02171200 |
| C | -5.02622200 | 2.99653600  | -4.63187500 | C | 3.04561200  | 4.43372000  | 0.86892400  |
| C | -4.52428400 | 3.93505800  | -3.72604400 | H | 2.29861700  | 5.15003800  | 1.20914400  |
| H | -3.35007600 | 4.27603800  | -1.96850600 | C | 4.38330000  | 4.08752600  | -1.17683200 |
| H | -3.64817700 | 0.20018200  | -3.27401700 | H | 4.26253800  | 4.56400200  | -2.15298200 |
| H | -5.09448500 | 0.90055700  | -5.14019500 | H | 5.40210500  | 3.69366400  | -1.12885900 |
| H | -5.66768300 | 3.30882900  | -5.45145500 | H | -0.75487200 | 2.98967400  | 0.65611600  |
| H | -4.77176500 | 4.98794300  | -3.83798000 | C | 0.75440400  | 4.01482200  | -2.52491200 |
| C | -2.48153400 | 1.77132200  | -1.36210100 | C | 0.68899000  | 3.18107700  | -3.81151800 |

|   |             |             |             |    |             |             |             |
|---|-------------|-------------|-------------|----|-------------|-------------|-------------|
| C | -0.25784400 | 5.17135000  | -2.55635000 | C  | 1.26973600  | -5.08868100 | -3.13661300 |
| H | 1.75597300  | 4.43848700  | -2.41095400 | H  | 0.77250900  | -5.94768600 | -2.67584100 |
| C | 0.84550100  | 4.05377200  | -5.06293500 | H  | 1.98553300  | -5.45918100 | -3.87955000 |
| H | -0.27838300 | 2.66346500  | -3.83756000 | H  | 0.51213800  | -4.49510600 | -3.66214300 |
| H | 1.46005600  | 2.40119400  | -3.78084400 | C  | 2.71119100  | -3.05915400 | -2.76399700 |
| C | -0.08669400 | 6.03966600  | -3.80963100 | H  | 2.00691300  | -2.45548100 | -3.34460200 |
| H | -1.26773000 | 4.74458900  | -2.54814800 | H  | 3.48001400  | -3.43910700 | -3.44578400 |
| H | -0.15204700 | 5.77784200  | -1.64827400 | H  | 3.19472100  | -2.40609400 | -2.03505200 |
| C | -0.18257100 | 5.19185500  | -5.08383800 | O  | 0.71349900  | -2.48707900 | -1.05598300 |
| H | 0.74598100  | 3.43115900  | -5.96004300 | O  | 0.37843600  | -3.55323900 | 2.37621300  |
| H | 1.85923300  | 4.48107700  | -5.08653800 | C  | 5.06040300  | -3.08928300 | 1.88020300  |
| H | -0.84664100 | 6.83040500  | -3.81572000 | H  | 5.56480200  | -2.56820400 | 2.68968400  |
| H | 0.89189200  | 6.54122200  | -3.77711300 | C  | 3.77629700  | -3.61009800 | 2.08527700  |
| H | -0.03548100 | 5.81989500  | -5.97111300 | C  | 3.03799700  | -3.40217900 | 3.38625200  |
| H | -1.19266100 | 4.76510700  | -5.15647300 | H  | 3.75670100  | -3.23402900 | 4.19724500  |
| C | 0.59230200  | 2.78715500  | 2.29271600  | H  | 2.46598400  | -4.30043200 | 3.63714100  |
| C | 0.46217000  | 4.02588200  | 3.19487400  | C  | 2.06121600  | -2.18734200 | 3.38946700  |
| C | -0.34070700 | 1.66275400  | 2.76698200  | C  | 2.81831400  | -0.88739900 | 3.10009700  |
| H | 1.61859000  | 2.41760900  | 2.29189000  | H  | 3.26157800  | -0.88626300 | 2.10394800  |
| C | 0.67442500  | 3.69602900  | 4.67591300  | H  | 3.61593600  | -0.75536400 | 3.84186500  |
| H | -0.54359900 | 4.43453800  | 3.06278100  | H  | 2.15590200  | -0.02311300 | 3.15382300  |
| H | 1.16277500  | 4.80298100  | 2.87321000  | C  | 1.38209100  | -2.12258800 | 4.77431800  |
| C | -0.12762700 | 1.35567400  | 4.25465300  | H  | 0.62069000  | -1.33753300 | 4.80161400  |
| H | -1.38028800 | 1.97909700  | 2.61213500  | H  | 2.12773300  | -1.90103100 | 5.54689300  |
| H | -0.18048200 | 0.77381500  | 2.15319300  | H  | 0.90075200  | -3.07465600 | 5.01969300  |
| C | -0.29460500 | 2.60034000  | 5.13075600  | C  | 0.94230800  | -2.40929600 | 2.36089300  |
| H | 0.54140900  | 4.60607500  | 5.27434000  | O  | 0.62640200  | -1.44471700 | 1.59575700  |
| H | 1.70820100  | 3.35714500  | 4.83824200  | O  | 0.34929600  | -4.61473400 | -0.38436800 |
| H | -0.82268900 | 0.56856700  | 4.56329500  | C  | 3.03391900  | -5.13534200 | -1.33774100 |
| H | 0.88317700  | 0.95773900  | 4.40623100  | H  | 2.50183900  | -6.00665900 | -0.94252500 |
| H | -0.12369900 | 2.35003100  | 6.18560000  | H  | 3.74515900  | -5.49858800 | -2.08847900 |
| H | -1.32590900 | 2.97279900  | 5.05101900  | C  | 3.77425400  | -4.44031500 | -0.21798100 |
| C | 5.33631400  | 5.30895900  | 0.89018700  | C  | 5.05141900  | -3.89567100 | -0.40448200 |
| H | 6.27170300  | 5.43902400  | 0.33499100  | H  | 5.54569400  | -3.98672200 | -1.36795300 |
| H | 5.18664700  | 6.20744300  | 1.50289000  | C  | 5.69462800  | -3.23841800 | 0.64628100  |
| C | 3.82739500  | 3.83068800  | 2.07699700  | H  | 6.69104600  | -2.83353100 | 0.49818900  |
| H | 3.53490100  | 4.36966500  | 2.98457100  | C  | 3.16498900  | -4.30361000 | 1.03558100  |
| H | 3.59797400  | 2.77558200  | 2.21677200  | H  | 2.18445400  | -4.73553900 | 1.19386200  |
| C | 5.32142600  | 4.05616600  | 1.77798100  | Rh | -0.80720200 | -1.74244600 | 0.12999100  |
| H | 5.92314900  | 4.16636400  | 2.68521200  | Rh | -1.07300100 | -3.99534900 | 0.98277500  |
| H | 5.72748800  | 3.20006000  | 1.22769800  | O  | -2.32287900 | -1.16974400 | 1.41880500  |
| H | -0.43986800 | 2.73082500  | -1.38501500 | C  | -5.08267700 | -0.87173500 | 2.24306200  |
| C | 0.94497000  | -3.73466200 | -1.08888800 | H  | -4.64565400 | 0.01758700  | 1.78159100  |
| C | 2.00259600  | -4.23472200 | -2.08197400 | H  | -5.86585800 | -0.53005400 | 2.93004800  |

|   |             |             |             |   |             |             |             |
|---|-------------|-------------|-------------|---|-------------|-------------|-------------|
| C | -5.69102500 | -1.74109400 | 1.16756300  | C | -3.41558800 | 3.08724300  | 0.59650400  |
| C | -6.88911700 | -2.43764700 | 1.37126100  | C | -3.61456400 | 3.51416100  | 2.01152800  |
| H | -7.40304800 | -2.35518900 | 2.32564800  | C | -4.60110200 | 2.91301600  | 2.80841500  |
| C | -7.43365900 | -3.22054700 | 0.35144900  | C | -4.73826400 | 3.26754400  | 4.15002300  |
| H | -8.36757900 | -3.75146700 | 0.51746500  | C | -3.91439400 | 4.25072300  | 4.70378400  |
| C | -5.06212200 | -1.84996100 | -0.07792800 | C | -2.94845500 | 4.87451900  | 3.90925900  |
| H | -4.14022900 | -1.30906400 | -0.24892100 | C | -2.79483000 | 4.50315200  | 2.57443900  |
| O | -2.50014300 | -4.31066700 | -0.46934700 | N | -2.20031200 | 3.00133700  | 0.18459900  |
| O | -2.17503000 | -2.25032100 | -1.34008600 | H | -3.95946000 | 0.96585700  | -1.03616300 |
| C | -6.79249700 | -3.31384000 | -0.88572700 | H | -6.02909500 | 0.56303400  | -2.33690000 |
| H | -7.22893100 | -3.91328900 | -1.68085700 | H | -7.68087400 | 4.24315200  | -0.84738000 |
| C | -5.59390900 | -2.62550400 | -1.11409100 | H | -5.62634400 | 4.61895700  | 0.48364500  |
| C | -4.86848900 | -2.70131600 | -2.43735800 | H | -5.24478300 | 2.15280200  | 2.37934400  |
| H | -5.56733200 | -2.99184800 | -3.23051300 | H | -5.49034100 | 2.77752500  | 4.76194800  |
| H | -4.48420700 | -1.71043100 | -2.69727400 | H | -2.31445700 | 5.64963300  | 4.33041600  |
| C | -3.68664300 | -3.71673900 | -2.47862800 | H | -2.04134000 | 4.97783700  | 1.95505600  |
| C | -4.21422900 | -5.15241200 | -2.37200300 | H | -4.02892000 | 4.53485800  | 5.74612500  |
| H | -4.76591300 | -5.31110300 | -1.44176800 | H | -7.88794600 | 2.20480200  | -2.26172800 |
| H | -4.88914300 | -5.35577600 | -3.21173900 | C | -1.34989200 | 1.37026500  | -1.41143600 |
| H | -3.39566600 | -5.87794300 | -2.40642900 | O | -1.06155100 | 1.10892000  | -2.70264500 |
| C | -2.92627600 | -3.53250400 | -3.80680600 | O | -1.05085100 | 0.59613300  | -0.48539300 |
| H | -2.07839900 | -4.22479100 | -3.87333000 | C | -0.17218700 | 0.01921000  | -2.99670000 |
| H | -3.59559000 | -3.73696400 | -4.65054900 | H | 0.67969600  | 0.02586300  | -2.31621900 |
| H | -2.54628900 | -2.51181600 | -3.90465700 | H | 0.15486900  | 0.18881500  | -4.02449700 |
| C | -2.71402800 | -3.40573800 | -1.33408200 | H | -0.69473300 | -0.93156300 | -2.91669500 |
| O | -2.52090300 | -3.26376700 | 2.25102300  | C | -2.78333700 | 4.89485400  | -1.95715500 |
| C | -2.85380000 | -2.03822800 | 2.18441400  | C | -2.52549500 | 3.54025100  | -2.25184700 |
| C | -3.98244100 | -1.55610000 | 3.10570100  | C | -2.90322000 | 3.07757500  | -3.52442400 |
| C | -3.39230700 | -0.50252700 | 4.06193100  | C | -3.49721500 | 3.93179700  | -4.45577500 |
| H | -2.97771800 | 0.34233900  | 3.50662600  | C | -3.74242100 | 5.26983200  | -4.14674500 |
| H | -4.17400500 | -0.12924500 | 4.73390300  | C | -3.38392000 | 5.74410300  | -2.88262800 |
| H | -2.59700500 | -0.93943600 | 4.67643700  | H | -2.50505500 | 5.28494800  | -0.98341600 |
| C | -4.56851700 | -2.72036700 | 3.91275100  | H | -2.73888500 | 2.04220200  | -3.78886200 |
| H | -3.80582700 | -3.18565000 | 4.54476500  | H | -3.78098800 | 3.53770600  | -5.42873600 |
| H | -5.36919000 | -2.34750100 | 4.56261600  | H | -4.20830200 | 5.92957100  | -4.87350000 |
| H | -4.98555000 | -3.49390900 | 3.26283200  | H | -3.56570600 | 6.78227700  | -2.61599300 |

### Rh-TS-R

|   |             |            |             |   |            |             |             |
|---|-------------|------------|-------------|---|------------|-------------|-------------|
| C | -4.77166200 | 1.68108900 | -0.99976900 | C | 5.65889800 | -0.44061500 | -0.60813000 |
| C | -5.93640800 | 1.45851600 | -1.73217400 | C | 6.66626900 | -0.06562400 | 0.47144500  |
| C | -6.98421000 | 2.37956900 | -1.68448900 | C | 7.80351400 | 0.69330700  | 0.16113300  |
| C | -6.86967100 | 3.52160500 | -0.88866900 | C | 6.41198900 | -0.39257000 | 1.80649500  |
| C | -5.71378000 | 3.73520900 | -0.14054000 | C | 8.67185200 | 1.11259200  | 1.16859100  |
| C | -4.64890300 | 2.82263100 | -0.19776700 | H | 8.01297000 | 0.95001400  | -0.87433600 |
|   |             |            |             | C | 7.28240100 | 0.02309600  | 2.81724000  |

|   |             |             |             |   |             |             |             |
|---|-------------|-------------|-------------|---|-------------|-------------|-------------|
| H | 5.52389900  | -0.96437900 | 2.05015100  | H | 0.80908100  | 6.27383500  | -1.42944300 |
| C | 8.41331400  | 0.77696000  | 2.50131600  | C | 1.12252100  | 5.54163500  | -4.82355200 |
| H | 9.55110000  | 1.69884200  | 0.91537900  | H | 1.69979700  | 3.56523200  | -5.52514100 |
| H | 7.07083100  | -0.23735600 | 3.85073800  | H | 2.89932100  | 4.35358500  | -4.50233800 |
| H | 9.08931000  | 1.10415400  | 3.28645500  | H | 0.71686400  | 7.35595600  | -3.69489600 |
| C | 6.25108200  | -1.14133400 | -1.82207100 | H | 2.30347800  | 6.65049600  | -3.39170500 |
| C | 5.62763200  | -1.05132100 | -3.07298900 | H | 1.54516900  | 6.06795000  | -5.68889300 |
| C | 7.38280300  | -1.95786300 | -1.69454100 | H | 0.05820100  | 5.37077400  | -5.04025300 |
| C | 6.12088400  | -1.76155100 | -4.16931800 | C | 0.78363600  | 2.73336500  | 2.55910800  |
| H | 4.74076400  | -0.43633700 | -3.18521600 | C | 0.82050500  | 3.81814200  | 3.65204200  |
| C | 7.87195800  | -2.67531000 | -2.78663900 | C | -0.30193100 | 1.68600700  | 2.86641200  |
| H | 7.88433700  | -2.03340700 | -0.73578100 | H | 1.74994300  | 2.23049800  | 2.49400800  |
| C | 7.24288800  | -2.58011000 | -4.03011500 | C | 0.95714300  | 3.23230900  | 5.06136800  |
| H | 5.62138900  | -1.67801900 | -5.13075700 | H | -0.11518900 | 4.38800600  | 3.59060600  |
| H | 8.74845900  | -3.30572200 | -2.66480600 | H | 1.63285300  | 4.52321900  | 3.44799600  |
| H | 7.62553200  | -3.13581000 | -4.88158600 | C | -0.17301300 | 1.12630000  | 4.28873500  |
| H | 4.91832100  | -1.10980000 | -0.16020000 | H | -1.28470300 | 2.15906900  | 2.76022100  |
| C | 4.61471000  | 4.73609300  | 0.45658100  | H | -0.25583900 | 0.88199700  | 2.12738600  |
| H | 4.35680500  | 5.72680700  | 0.07222200  | C | -0.16920600 | 2.23297500  | 5.34772900  |
| N | 0.51087900  | 3.35681000  | 1.25932800  | H | 0.95678800  | 4.04259200  | 5.80203200  |
| N | 0.74624400  | 3.60871200  | -1.00234800 | H | 1.92641500  | 2.72029600  | 5.15326500  |
| N | 2.68363300  | 3.33978800  | 0.36674100  | H | -0.98869800 | 0.41734800  | 4.47169500  |
| C | 1.31679600  | 3.43586500  | 0.17707800  | H | 0.76101700  | 0.55861000  | 4.37760900  |
| C | 3.57392100  | 2.74696200  | -0.61402400 | H | -0.05203600 | 1.80100900  | 6.35018700  |
| H | 3.07023400  | 2.62226800  | -1.57147200 | H | -1.13459500 | 2.75825500  | 5.33536000  |
| O | 3.52344000  | 0.73587600  | 0.77581100  | C | 5.82734100  | 4.76379600  | 1.39652100  |
| C | 3.99711200  | 1.32393300  | -0.19103000 | H | 6.78055500  | 4.81748800  | 0.85847500  |
| N | 4.91966500  | 0.75750200  | -1.01986800 | H | 5.76816900  | 5.64180800  | 2.05304600  |
| H | 5.37969800  | 1.35786300  | -1.69341900 | C | 4.14835000  | 3.40232300  | 2.49442900  |
| C | 3.45178400  | 4.15472000  | 1.31664100  | H | 3.90790500  | 3.91353400  | 3.43329700  |
| H | 2.79274400  | 4.93622300  | 1.69561900  | H | 3.79857700  | 2.37311000  | 2.56938600  |
| C | 4.76833800  | 3.73806800  | -0.72179100 | C | 5.66231300  | 3.47735700  | 2.21950700  |
| H | 4.74061800  | 4.25911700  | -1.68253300 | H | 6.26142900  | 3.47334700  | 3.13538300  |
| H | 5.72691400  | 3.21502200  | -0.66168100 | H | 5.98024400  | 2.61171800  | 1.62826700  |
| H | -0.48857600 | 3.42467300  | 1.02685700  | H | -0.56233400 | 3.21560000  | -1.17126500 |
| C | 1.36442400  | 4.30164700  | -2.12693500 | C | 0.66318600  | -3.53240700 | -1.42332600 |
| C | 1.26429300  | 3.45158900  | -3.40470600 | C | 1.76565900  | -3.94645000 | -2.40375200 |
| C | 0.68468200  | 5.66807200  | -2.33595900 | C | 1.05866400  | -4.55059600 | -3.63590100 |
| H | 2.42099100  | 4.50947600  | -1.91970500 | H | 0.47129300  | -5.43252800 | -3.36208700 |
| C | 1.81849300  | 4.18866200  | -4.63001200 | H | 1.80291200  | -4.84617600 | -4.38425800 |
| H | 0.20956800  | 3.20253600  | -3.57103500 | H | 0.38500900  | -3.81868000 | -4.09773100 |
| H | 1.78683800  | 2.49756500  | -3.25679400 | C | 2.60588300  | -2.73721100 | -2.82763000 |
| C | 1.24440000  | 6.40316600  | -3.56057100 | H | 1.99454200  | -1.99251900 | -3.34596800 |
| H | -0.39030700 | 5.50797800  | -2.46968400 | H | 3.39830900  | -3.06423000 | -3.50838800 |

|    |             |             |             |            |             |             |             |
|----|-------------|-------------|-------------|------------|-------------|-------------|-------------|
| H  | 3.07371400  | -2.25018700 | -1.96913800 | O          | -2.80184200 | -4.06174700 | -1.04403500 |
| O  | 0.44403800  | -2.29181600 | -1.26460600 | O          | -2.43848200 | -1.89619400 | -1.57651300 |
| O  | -0.05839700 | -3.78325100 | 2.00304600  | C          | -6.98064700 | -3.12731700 | -1.29443100 |
| C  | 4.67440400  | -3.68905600 | 1.82117100  | H          | -7.38105100 | -3.65115200 | -2.15878800 |
| H  | 5.17539900  | -3.33380300 | 2.71806500  | C          | -5.83904700 | -2.32821200 | -1.43440000 |
| C  | 3.32755500  | -4.06941700 | 1.88289400  | C          | -5.11861700 | -2.17599000 | -2.75469400 |
| C  | 2.52488000  | -3.92390500 | 3.15523000  | H          | -5.81599000 | -2.32606700 | -3.58717400 |
| H  | 3.20229900  | -3.89140300 | 4.01664900  | H          | -4.72763700 | -1.15691000 | -2.83623700 |
| H  | 1.86945900  | -4.78997700 | 3.28809000  | C          | -3.92664200 | -3.15798400 | -2.96653700 |
| C  | 1.65381200  | -2.63303000 | 3.22090800  | C          | -4.43112500 | -4.59762100 | -3.11801900 |
| C  | 2.53008200  | -1.38699800 | 3.05690600  | H          | -4.97829800 | -4.92917500 | -2.23223800 |
| H  | 3.03167700  | -1.36530700 | 2.08892000  | H          | -5.10082100 | -4.66078800 | -3.98365300 |
| H  | 3.29051800  | -1.36924300 | 3.84726900  | H          | -3.59895300 | -5.29012900 | -3.27882900 |
| H  | 1.93776100  | -0.47523000 | 3.12746500  | C          | -3.15369100 | -2.73528200 | -4.23072300 |
| C  | 0.92560400  | -2.60485600 | 4.58241100  | H          | -2.28679600 | -3.38680000 | -4.39405500 |
| H  | 0.25584200  | -1.74173300 | 4.64946600  | H          | -3.80489800 | -2.81395700 | -5.10874900 |
| H  | 1.65831600  | -2.53160900 | 5.39450000  | H          | -2.79954800 | -1.70301500 | -4.15308100 |
| H  | 0.33355800  | -3.51389600 | 4.73130900  | C          | -2.98326800 | -3.03401000 | -1.76659900 |
| C  | 0.55909200  | -2.67523800 | 2.14537400  | O          | -2.92725900 | -3.37848700 | 1.80970500  |
| O  | 0.30956000  | -1.60998000 | 1.49759500  | C          | -3.18378000 | -2.13837700 | 1.93517200  |
| O  | 0.01111000  | -4.46991900 | -0.85768500 | C          | -4.29277300 | -1.72612900 | 2.91003400  |
| C  | 2.66582500  | -5.04118300 | -1.75662100 | C          | -3.68870300 | -0.74313400 | 3.93197900  |
| H  | 2.03781300  | -5.90894500 | -1.53125200 | H          | -3.26375000 | 0.13171600  | 3.43451700  |
| H  | 3.39094000  | -5.35088300 | -2.51808600 | H          | -4.46577000 | -0.40543600 | 4.62760300  |
| C  | 3.39532600  | -4.59819300 | -0.50758600 | H          | -2.89820700 | -1.22757900 | 4.51666300  |
| C  | 4.73732400  | -4.19885200 | -0.54672700 | C          | -4.86869200 | -2.94812800 | 3.63366000  |
| H  | 5.28481600  | -4.22921200 | -1.48461500 | H          | -4.09308100 | -3.46872300 | 4.20402000  |
| C  | 5.37513900  | -3.76393400 | 0.61661500  | H          | -5.64754300 | -2.62376600 | 4.33393300  |
| H  | 6.41979300  | -3.47030300 | 0.58084500  | H          | -5.30896700 | -3.66326500 | 2.93441100  |
| C  | 2.71932000  | -4.54995900 | 0.71812400  |            |             |             |             |
| H  | 1.69039800  | -4.88126500 | 0.76496200  |            |             |             |             |
| Rh | -1.08707900 | -1.65668900 | -0.02674400 | <b>TS1</b> |             |             |             |
| Rh | -1.45628600 | -3.97919100 | 0.50535900  | C          | -1.77383200 | 1.33590900  | -1.53196200 |
| O  | -2.59226600 | -1.19922700 | 1.31141500  | C          | -2.84275900 | 2.36302000  | -1.92233200 |
| C  | -5.40594200 | -0.98130800 | 2.11008400  | C          | -2.21270000 | 3.76451500  | -1.78836600 |
| H  | -4.98461600 | -0.04023900 | 1.74466300  | H          | -1.89152800 | 3.95646300  | -0.76065300 |
| H  | -6.19937800 | -0.73056400 | 2.82424900  | H          | -2.94447000 | 4.52966800  | -2.07165600 |
| H  | -6.19937800 | -0.73056400 | 2.82424900  | H          | -1.34362200 | 3.86779300  | -2.44936500 |
| C  | -5.98083700 | -1.74579300 | 0.94058000  | C          | -3.31486900 | 2.14132100  | -3.36346700 |
| C  | -7.12100400 | -2.55121900 | 1.05679800  | H          | -2.48601800 | 2.25299200  | -4.06905100 |
| H  | -7.63009100 | -2.62985500 | 2.01407200  | H          | -4.08075300 | 2.88406300  | -3.61565900 |
| C  | -7.61476500 | -3.23781500 | -0.05467500 | H          | -3.74111900 | 1.14475400  | -3.50140300 |
| H  | -8.50575700 | -3.85261500 | 0.04295700  | O          | -1.37080600 | 0.51265000  | -2.40907800 |
| C  | -5.35864800 | -1.65155400 | -0.30809500 | O          | -1.35508500 | -1.33081800 | 0.83095900  |
| H  | -4.48070400 | -1.02732200 | -0.40459300 | C          | -5.74791400 | -1.70093300 | -0.71151400 |

|   |             |             |             |    |             |             |             |
|---|-------------|-------------|-------------|----|-------------|-------------|-------------|
| H | -6.16970600 | -2.70171400 | -0.66724700 | H  | -0.14108600 | 5.38289500  | 0.96089200  |
| C | -4.66842900 | -1.36773600 | 0.11706800  | C  | 0.10211400  | 0.94233700  | 2.31134500  |
| C | -4.02933600 | -2.39038200 | 1.02884200  | Rh | 0.06912700  | -0.87793100 | -1.90259900 |
| H | -4.76823900 | -3.14148900 | 1.33164800  | Rh | 0.08144500  | 0.07882100  | 0.34636000  |
| H | -3.66955400 | -1.89738100 | 1.93544800  | O  | 1.47240300  | -2.24045600 | -1.21402500 |
| C | -2.83223200 | -3.15861000 | 0.38749800  | C  | 4.18472900  | -3.06641100 | -0.39129400 |
| C | -3.30160500 | -4.01417800 | -0.79477900 | H  | 3.95734900  | -3.35518700 | -1.42235000 |
| H | -3.74349800 | -3.40376900 | -1.58590000 | H  | 4.91479200  | -3.78566300 | -0.00223100 |
| H | -4.05451800 | -4.73266600 | -0.45007800 | C  | 4.76286600  | -1.67014100 | -0.37844900 |
| H | -2.46758000 | -4.57446600 | -1.22755800 | C  | 5.67875800  | -1.25770200 | 0.59823800  |
| C | -2.18227100 | -4.06172500 | 1.45457100  | H  | 6.02309600  | -1.96702500 | 1.34601200  |
| H | -1.34066900 | -4.62073500 | 1.02860800  | C  | 6.16043100  | 0.05240300  | 0.60582700  |
| H | -2.91499100 | -4.78555700 | 1.82956800  | H  | 6.87948800  | 0.35979300  | 1.36065200  |
| H | -1.80757100 | -3.47582600 | 2.29820800  | C  | 4.35560500  | -0.74261200 | -1.34488400 |
| C | -1.77879000 | -2.13956000 | -0.06139500 | H  | 3.65561100  | -1.05565200 | -2.11260800 |
| O | -1.39564800 | -2.17198000 | -1.26982100 | O  | 1.54836300  | 1.36119500  | -0.30880500 |
| O | -1.35116100 | 1.40393700  | -0.32979100 | O  | 1.54030000  | 0.50010200  | -2.39691300 |
| C | -4.03259400 | 2.25867100  | -0.91758500 | C  | 5.73166700  | 0.96726800  | -0.35735900 |
| H | -3.66681300 | 2.55467200  | 0.07021500  | H  | 6.11683700  | 1.98355500  | -0.34997500 |
| H | -4.77869000 | 2.99939700  | -1.22844000 | C  | 4.81647100  | 0.57907100  | -1.34469200 |
| C | -4.66640400 | 0.88894100  | -0.83215300 | C  | 4.29570600  | 1.55325300  | -2.37595700 |
| C | -5.74529400 | 0.53011500  | -1.65104500 | H  | 5.06171300  | 2.29926800  | -2.61791300 |
| H | -6.16754400 | 1.26188200  | -2.33495300 | H  | 4.06089700  | 1.01372500  | -3.29885800 |
| C | -6.28618900 | -0.75485500 | -1.58508100 | C  | 3.01867600  | 2.33533700  | -1.93623100 |
| H | -7.13093200 | -1.01944700 | -2.21577300 | C  | 3.33853400  | 3.30009500  | -0.78761600 |
| C | -4.15574200 | -0.06555900 | 0.05650800  | H  | 3.70010900  | 2.77293700  | 0.09786100  |
| H | -3.33209100 | 0.20585800  | 0.70725200  | H  | 4.11123100  | 4.00736200  | -1.11001200 |
| C | -0.37826200 | -0.07118300 | 3.30551700  | H  | 2.45327700  | 3.87481700  | -0.49768000 |
| O | -1.71073500 | 0.03491700  | 3.42810700  | C  | 2.47934900  | 3.12536700  | -3.14422700 |
| O | 0.30109600  | -0.90695800 | 3.87011200  | H  | 1.57481000  | 3.68376300  | -2.87445900 |
| C | -2.34080900 | -0.95123700 | 4.26793500  | H  | 3.23199700  | 3.84589400  | -3.48410500 |
| H | -3.40594900 | -0.72447800 | 4.23052500  | H  | 2.23566200  | 2.45890300  | -3.97625600 |
| H | -1.96966000 | -0.86624800 | 5.29296900  | C  | 1.95212500  | 1.31678200  | -1.51824100 |
| H | -2.14698600 | -1.95619200 | 3.89045200  | O  | 1.50693500  | -1.30620400 | 0.84377200  |
| C | -0.00727900 | 3.31745600  | 1.53659900  | C  | 1.87321200  | -2.17736100 | -0.01002900 |
| C | -0.19945200 | 2.36938500  | 2.55944800  | C  | 2.88358200  | -3.23092400 | 0.45557500  |
| C | -0.66694000 | 2.80997800  | 3.81476800  | C  | 2.28291400  | -4.62318200 | 0.18382800  |
| C | -0.96477000 | 4.15184200  | 4.02777700  | H  | 2.05400000  | -4.75653400 | -0.87723300 |
| C | -0.77895600 | 5.08092600  | 2.99961800  | H  | 2.99249900  | -5.40095100 | 0.48839000  |
| C | -0.29301600 | 4.66182500  | 1.75869800  | H  | 1.35862100  | -4.76504000 | 0.75645300  |
| H | 0.36948500  | 2.98951200  | 0.57900000  | C  | 3.18135000  | -3.07914600 | 1.95220200  |
| H | -0.80305000 | 2.10032200  | 4.62338000  | H  | 2.27077900  | -3.19928500 | 2.54670400  |
| H | -1.33218100 | 4.47583700  | 4.99691900  | H  | 3.89881000  | -3.84838100 | 2.26106100  |
| H | -1.00832700 | 6.12931100  | 3.16834000  | H  | 3.60335000  | -2.09891100 | 2.18485600  |

|            |             |             |             |   |             |             |             |
|------------|-------------|-------------|-------------|---|-------------|-------------|-------------|
| N          | 1.83297800  | 0.83585900  | 2.60659700  | H | 2.59061200  | -0.14183700 | 0.11163300  |
| N          | 2.90071200  | 0.91724600  | 2.31503400  | C | 3.46170100  | 3.35097100  | 1.47903300  |
|            |             |             |             | C | 3.68794300  | 4.69603500  | 1.75964500  |
| <b>TS2</b> |             |             |             | C | 4.63880200  | 5.41714100  | 1.02975000  |
| C          | -2.77542500 | -0.76580600 | -1.90141200 | C | 5.36549600  | 4.78334200  | 0.01932400  |
| C          | -3.54882000 | -0.56720200 | -3.20989400 | C | 5.14467200  | 3.43466900  | -0.26021500 |
| C          | -2.54849400 | -0.71535100 | -4.37399500 | C | 4.18497900  | 2.70814300  | 0.46214800  |
| H          | -1.75048300 | 0.02971300  | -4.30674100 | C | 3.87462300  | 1.29676900  | 0.11797300  |
| H          | -3.06701200 | -0.58363200 | -5.33049900 | C | 4.92546400  | 0.49027000  | -0.56839500 |
| H          | -2.09323600 | -1.71300600 | -4.37230200 | C | 4.62769500  | -0.14388000 | -1.78037400 |
| C          | -4.66418100 | -1.60925500 | -3.34787500 | C | 5.58455000  | -0.93640800 | -2.41473100 |
| H          | -4.25370700 | -2.62366400 | -3.36055100 | C | 6.84441900  | -1.10913100 | -1.83683500 |
| H          | -5.20209800 | -1.44686500 | -4.28919100 | C | 7.15109400  | -0.46881500 | -0.63216400 |
| H          | -5.38051100 | -1.54799100 | -2.52523400 | C | 6.20144000  | 0.33875300  | -0.00697100 |
| O          | -3.10972700 | -1.71379000 | -1.13185600 | N | 2.70538400  | 0.83724500  | 0.38364300  |
| O          | -2.10018500 | 1.03090900  | 1.10281900  | H | 2.71211400  | 2.78779500  | 2.02006100  |
| C          | -6.58258200 | 1.78286600  | 0.20729700  | H | 3.12250400  | 5.18322400  | 2.54936100  |
| H          | -7.19702300 | 2.00014600  | 1.07709900  | H | 6.10342600  | 5.33867700  | -0.55289900 |
| C          | -5.20073800 | 2.00727200  | 0.26272300  | H | 5.70231900  | 2.95007400  | -1.05477600 |
| C          | -4.52959200 | 2.48650100  | 1.52975900  | H | 3.65046600  | 0.00328400  | -2.22772600 |
| H          | -5.22263900 | 3.10232800  | 2.11495100  | H | 5.34470600  | -1.42009700 | -3.35743100 |
| H          | -3.67170400 | 3.11233600  | 1.27122300  | H | 8.13119000  | -0.59662200 | -0.18124300 |
| C          | -4.02828400 | 1.34464100  | 2.46777700  | H | 6.43987900  | 0.84100000  | 0.92588600  |
| C          | -5.20383100 | 0.53917800  | 3.03178400  | H | 7.58758900  | -1.73282900 | -2.32556100 |
| H          | -5.78364300 | 0.06029800  | 2.23891400  | H | 4.81437800  | 6.46657100  | 1.25026900  |
| H          | -5.86910100 | 1.20554200  | 3.59337300  | C | 0.03149000  | 2.73982100  | 0.59055400  |
| H          | -4.85154900 | -0.24246000 | 3.71141800  | O | -0.83586900 | 3.61406500  | 0.02989000  |
| C          | -3.21893900 | 1.96961000  | 3.62213400  | O | 0.43447700  | 2.83619200  | 1.73058500  |
| H          | -2.86125100 | 1.19500300  | 4.31064500  | C | -1.29424800 | 4.67149100  | 0.89320800  |
| H          | -3.85075500 | 2.66192900  | 4.19051100  | H | -2.04622500 | 5.21180400  | 0.31807200  |
| H          | -2.34976900 | 2.51579400  | 3.24519100  | H | -0.46334400 | 5.33518200  | 1.14948400  |
| C          | -3.07720400 | 0.44005800  | 1.67622200  | H | -1.72973200 | 4.26366300  | 1.80714300  |
| O          | -3.30434000 | -0.80472900 | 1.64960000  | C | 0.97693000  | 1.12008400  | -2.71463300 |
| O          | -1.82220400 | 0.06053700  | -1.69342800 | C | 0.97390700  | 2.00802700  | -1.61064800 |
| C          | -4.12793100 | 0.88258700  | -3.23156500 | C | 1.66849000  | 3.24035800  | -1.73299200 |
| H          | -3.28712500 | 1.58175800  | -3.27813200 | C | 2.35410900  | 3.55425700  | -2.89663400 |
| H          | -4.69451700 | 0.98766500  | -4.16439400 | C | 2.33893400  | 2.66449100  | -3.97808200 |
| C          | -5.00538200 | 1.22576700  | -2.04926400 | C | 1.64321900  | 1.45425200  | -3.88751700 |
| C          | -6.38918900 | 1.00788100  | -2.07799200 | H | 0.45325200  | 0.17999400  | -2.62840100 |
| H          | -6.85411400 | 0.62335100  | -2.98210200 | H | 1.69198400  | 3.92988700  | -0.89672500 |
| C          | -7.17262700 | 1.29178300  | -0.95829800 | H | 2.90217200  | 4.48873400  | -2.96568700 |
| H          | -8.24699800 | 1.13114900  | -0.99460200 | H | 2.87190200  | 2.91557700  | -4.89083200 |
| C          | -4.43427400 | 1.74325100  | -0.87976000 | H | 1.63101300  | 0.76986500  | -4.73065800 |
| H          | -3.36721800 | 1.93412600  | -0.85222400 | C | 0.30657900  | 1.64585700  | -0.38999300 |

|    |             |             |             |   |             |             |             |
|----|-------------|-------------|-------------|---|-------------|-------------|-------------|
| Rh | -2.03000100 | -2.04389000 | 0.60204300  | C | 2.45143600  | 0.65195700  | 1.80979600  |
| Rh | -0.69890300 | -0.04813100 | 0.03766400  | C | 3.38097000  | 1.68989600  | 2.45043800  |
| O  | -0.87809500 | -2.22634700 | 2.31495900  | C | 2.48494500  | 2.68270500  | 3.21841200  |
| C  | 1.63374000  | -2.82318900 | 3.76514800  | H | 1.78194000  | 3.17671500  | 2.54461700  |
| H  | 0.92119000  | -3.65042600 | 3.84415600  | H | 3.10510300  | 3.44876100  | 3.69845400  |
| H  | 2.27600800  | -2.85897200 | 4.65304500  | H | 1.91526500  | 2.16737700  | 4.00110100  |
| C  | 2.45986600  | -2.99907200 | 2.51161800  | C | 4.35733800  | 1.01973500  | 3.42519100  |
| C  | 3.76962100  | -2.51059500 | 2.40969400  | H | 3.81934700  | 0.52947700  | 4.24153100  |
| H  | 4.22786700  | -2.01644100 | 3.26218800  | H | 5.01963000  | 1.77797200  | 3.85933600  |
| C  | 4.49234500  | -2.66897600 | 1.22618400  | H | 4.97574100  | 0.26753300  | 2.92905300  |
| H  | 5.50808500  | -2.29259800 | 1.15552800  | O | 2.42205600  | -0.51450800 | 2.31600200  |
| C  | 1.90313500  | -3.64768700 | 1.40289800  | O | 1.99962800  | -0.88748800 | -1.39801900 |
| H  | 0.89095800  | -4.03335100 | 1.47313700  | C | 6.65995800  | -0.16942300 | -0.99409400 |
| O  | 0.59033900  | -1.32948400 | -0.96359600 | H | 7.28628300  | -0.85390800 | -1.56074900 |
| O  | -0.69220000 | -3.14241100 | -0.52234400 | C | 5.30894000  | -0.02450600 | -1.33543800 |
| C  | 3.91649800  | -3.30953600 | 0.12771000  | C | 4.68615100  | -0.85379300 | -2.43587800 |
| H  | 4.48927400  | -3.42858400 | -0.78739700 | H | 5.45667300  | -1.16746700 | -3.14985700 |
| C  | 2.60820100  | -3.80479600 | 0.20339700  | H | 3.95693200  | -0.25287000 | -2.98340400 |
| C  | 1.92942400  | -4.45515900 | -0.97951300 | C | 3.97275700  | -2.14657900 | -1.93723600 |
| H  | 2.65673600  | -5.00939600 | -1.58449600 | C | 4.96977600  | -3.08349900 | -1.24358400 |
| H  | 1.18583500  | -5.17355800 | -0.62039600 | H | 5.40290600  | -2.62685600 | -0.35053200 |
| C  | 1.20730700  | -3.44997600 | -1.93370500 | H | 5.78415000  | -3.32429700 | -1.93692200 |
| C  | 2.23010600  | -2.60751500 | -2.69897200 | H | 4.48713400  | -4.01878200 | -0.94561400 |
| H  | 2.86699900  | -2.04557600 | -2.01847600 | C | 3.34509000  | -2.87680400 | -3.14211000 |
| H  | 2.86491200  | -3.26325200 | -3.30622800 | H | 2.82676600  | -3.78610300 | -2.81648000 |
| H  | 1.73559200  | -1.89662600 | -3.36876700 | H | 4.12957900  | -3.16863200 | -3.84977600 |
| C  | 0.33571700  | -4.24019000 | -2.92640500 | H | 2.62478500  | -2.24329500 | -3.66606100 |
| H  | -0.19403400 | -3.56184300 | -3.60602200 | C | 2.83080100  | -1.76254400 | -0.98743400 |
| H  | 0.96824000  | -4.89859300 | -3.53296700 | O | 2.77694600  | -2.35594000 | 0.13441600  |
| H  | -0.40657600 | -4.85122400 | -2.40624400 | O | 1.74620500  | 1.04340300  | 0.82524600  |
| C  | 0.29332800  | -2.56760600 | -1.07437000 | C | 4.14133300  | 2.46164200  | 1.32960800  |
| O  | 0.30396800  | -0.37015300 | 1.79086000  | H | 3.40175600  | 2.95996300  | 0.69679300  |
| C  | 0.01468200  | -1.35140800 | 2.54506600  | H | 4.73347500  | 3.24202200  | 1.82210900  |
| C  | 0.83136600  | -1.48582700 | 3.83547200  | C | 5.04381800  | 1.58795800  | 0.48735900  |
| C  | -0.14453800 | -1.55466400 | 5.02493700  | C | 6.39908700  | 1.42739700  | 0.80550600  |
| H  | -0.84478700 | -2.38812000 | 4.91844600  | H | 6.82427100  | 1.98401900  | 1.63695000  |
| H  | 0.41551700  | -1.68720000 | 5.95790200  | C | 7.20344900  | 0.56138200  | 0.06342100  |
| H  | -0.72331000 | -0.62707500 | 5.10729400  | H | 8.25546400  | 0.45133300  | 0.31392600  |
| C  | 1.77537400  | -0.28951100 | 4.00767200  | C | 4.52478500  | 0.87498100  | -0.60128800 |
| H  | 1.21340300  | 0.64808200  | 4.05421900  | H | 3.48474700  | 1.01105500  | -0.87133100 |
| H  | 2.33929800  | -0.40249900 | 4.94133100  | H | -1.58103600 | 0.45105700  | -2.61975500 |
| H  | 2.48091700  | -0.20574800 | 3.17864500  | C | -2.39704900 | 4.40668000  | -1.56860800 |
|    |             |             |             | C | -2.46899100 | 5.72730700  | -1.13247400 |
|    |             |             |             | C | -3.14289800 | 6.03791800  | 0.05118400  |

**TS3'**



|    |             |             |             |                 |             |             |             |
|----|-------------|-------------|-------------|-----------------|-------------|-------------|-------------|
| C  | -3.77287000 | 5.02608000  | 0.77980600  | H               | -1.60467600 | -5.27173000 | 0.48457300  |
| C  | -3.71594400 | 3.70636300  | 0.33481900  | H               | -2.87263400 | -5.54878400 | -0.71207000 |
| C  | -2.99899900 | 3.37996100  | -0.82544700 | C               | -3.25362200 | -3.90722900 | 0.62296000  |
| C  | -2.91289100 | 1.97302000  | -1.29140400 | C               | -4.60658100 | -3.78554400 | 0.28243800  |
| C  | -4.17206900 | 1.22607900  | -1.49202100 | H               | -5.00252400 | -4.35482000 | -0.55514200 |
| C  | -4.17351100 | -0.17948100 | -1.46056200 | C               | -5.44705000 | -2.94453900 | 1.01449100  |
| C  | -5.34380800 | -0.88583700 | -1.72477400 | H               | -6.49613100 | -2.86019900 | 0.74414800  |
| C  | -6.53310000 | -0.20595300 | -2.00067900 | C               | -2.77766900 | -3.18513000 | 1.72544600  |
| C  | -6.54623400 | 1.19064100  | -2.01095500 | H               | -1.74195000 | -3.29840900 | 2.02034400  |
| C  | -5.37617300 | 1.90317600  | -1.75784800 | O               | -1.05338300 | 0.17208600  | 1.18286500  |
| N  | -1.81287900 | 1.36311000  | -1.62280100 | O               | -0.33393500 | -1.39724500 | 2.64321200  |
| H  | -1.86471900 | 4.16457400  | -2.48170700 | C               | -4.94533600 | -2.20322600 | 2.08462800  |
| H  | -1.98857500 | 6.51157600  | -1.70982900 | H               | -5.60342000 | -1.54298200 | 2.64385900  |
| H  | -4.31150900 | 5.26430100  | 1.69265300  | C               | -3.59848200 | -2.31569300 | 2.45452600  |
| H  | -4.21219800 | 2.92026600  | 0.89302800  | C               | -3.02696600 | -1.51631100 | 3.60498500  |
| H  | -3.25548600 | -0.70138500 | -1.21393900 | H               | -3.82851700 | -1.24954700 | 4.30354900  |
| H  | -5.33150000 | -1.96923900 | -1.69500500 | H               | -2.30641600 | -2.12911500 | 4.15512800  |
| H  | -7.46648600 | 1.72714800  | -2.22468600 | C               | -2.32054900 | -0.18724300 | 3.19884100  |
| H  | -5.38797000 | 2.98703100  | -1.78912800 | C               | -3.31022500 | 0.77874300  | 2.54003400  |
| H  | -7.44519400 | -0.76193000 | -2.19955700 | H               | -3.71526200 | 0.37313800  | 1.60970200  |
| H  | -3.18583900 | 7.06635000  | 0.39844000  | H               | -4.14398700 | 0.97330000  | 3.22492500  |
| C  | 0.10817800  | 1.06603200  | -2.71889600 | H               | -2.82750000 | 1.73235600  | 2.31369900  |
| O  | 1.33012100  | 1.30488800  | -3.14554000 | C               | -1.72254200 | 0.46221800  | 4.46476200  |
| O  | -0.67688800 | 0.26195600  | -3.35955100 | H               | -1.18952800 | 1.38700800  | 4.21365200  |
| C  | 1.74224200  | 0.63737900  | -4.35653400 | H               | -2.52327600 | 0.71290900  | 5.16997400  |
| H  | 2.76451100  | 0.96994300  | -4.52997200 | H               | -1.02021500 | -0.21425500 | 4.96111700  |
| H  | 1.09984500  | 0.93990300  | -5.18768600 | C               | -1.14956200 | -0.49793300 | 2.26057200  |
| H  | 1.70387400  | -0.44286900 | -4.22444000 | O               | -0.75567700 | -1.70523500 | -0.99484800 |
| C  | -0.30835200 | 3.21702800  | 0.41496800  | C               | -0.66858200 | -2.89947200 | -0.56455900 |
| C  | 0.11007000  | 2.90432300  | -0.89088900 | C               | -1.48347700 | -3.99638900 | -1.26025300 |
| C  | 1.01029500  | 3.77426100  | -1.52633100 | C               | -0.47334300 | -4.96749900 | -1.90690600 |
| C  | 1.46070300  | 4.92900100  | -0.88302400 | H               | 0.19927600  | -5.39784800 | -1.15921500 |
| C  | 1.00809200  | 5.24675400  | 0.39771000  | H               | -1.00824600 | -5.78380000 | -2.40565500 |
| C  | 0.11892300  | 4.38102900  | 1.04252300  | H               | 0.13302500  | -4.45006800 | -2.65993700 |
| H  | -0.97332500 | 2.53587800  | 0.92981400  | C               | -2.39900000 | -3.41800500 | -2.34256300 |
| H  | 1.34675700  | 3.55920300  | -2.53327100 | H               | -1.82662300 | -2.85929000 | -3.08854700 |
| H  | 2.15353700  | 5.59019600  | -1.39702300 | H               | -2.92445500 | -4.23457000 | -2.85157300 |
| H  | 1.34590500  | 6.15412700  | 0.89052300  | H               | -3.14625200 | -2.74626100 | -1.91953500 |
| H  | -0.24027700 | 4.61301800  | 2.04126500  |                 |             |             |             |
| C  | -0.44605300 | 1.71477300  | -1.56749400 |                 |             |             |             |
| Rh | 1.23811500  | -1.93248900 | 1.41811900  | <b>TS3-G2-R</b> |             |             |             |
| Rh | 0.45995700  | -0.25008500 | -0.15029900 | C               | 3.91354400  | 0.48658800  | 3.06799300  |
| O  | 0.06693800  | -3.28451200 | 0.40172700  | H               | 4.94547200  | 0.72973200  | 2.79740100  |
| C  | -2.30923300 | -4.76968300 | -0.18551000 | C               | 4.11459300  | -1.25416200 | -2.45513300 |
|    |             |             |             | H               | 3.57428200  | -1.74480200 | -3.27006600 |

|   |             |             |             |   |             |             |             |
|---|-------------|-------------|-------------|---|-------------|-------------|-------------|
| N | 0.69618100  | 1.02153900  | -1.00043700 | H | 2.19573500  | 5.09464500  | -2.57797300 |
| N | 0.24098500  | -1.20547700 | -0.68858200 | H | 3.26000800  | 4.26328500  | -1.44676300 |
| N | 2.50393200  | -0.43922700 | -0.89947500 | H | 1.03178400  | 4.85142300  | 1.57890900  |
| C | 1.13868500  | -0.24977800 | -0.85873900 | H | 2.55311500  | 4.11575200  | 1.08186600  |
| C | 3.21395700  | -1.48453300 | -0.15757500 | H | 2.12051900  | 6.14147500  | -0.29028700 |
| H | 2.50096600  | -2.17175700 | 0.29426500  | H | 0.54258400  | 5.50753200  | -0.76396500 |
| O | 5.21958000  | -1.11923700 | 1.18579600  | C | 5.50059600  | -0.76314700 | -2.88932000 |
| C | 4.01930900  | -0.87830500 | 1.02424300  | H | 6.24479500  | -1.56654900 | -2.91751800 |
| N | 3.30741800  | -0.09724400 | 1.86582500  | H | 5.44034900  | -0.33370900 | -3.89814400 |
| H | 2.29368200  | -0.03127200 | 1.78584700  | C | 4.48795700  | 1.04667300  | -1.61270500 |
| C | 3.36595600  | 0.03004200  | -1.99557400 | H | 4.39395800  | 1.93696200  | -2.24333500 |
| H | 2.72650800  | 0.44314900  | -2.77582000 | H | 4.39365500  | 1.37602600  | -0.57547400 |
| C | 4.12092600  | -2.16929600 | -1.19956500 | C | 5.83389100  | 0.33352100  | -1.86455500 |
| H | 3.73782900  | -3.16334600 | -1.44313400 | H | 6.61275200  | 1.01830300  | -2.21525500 |
| H | 5.12263100  | -2.28828200 | -0.78322500 | H | 6.18767900  | -0.12244700 | -0.93493500 |
| H | -0.31358500 | 1.11132300  | -1.02188400 | H | -0.77845000 | -0.92570000 | 0.10936500  |
| C | 0.46526200  | -2.59340700 | -1.09324800 | C | -4.99135500 | 0.37647400  | -0.67551000 |
| C | 0.28482800  | -3.57411100 | 0.07867600  | C | -5.76803700 | -0.45126100 | -1.48443800 |
| C | -0.47873700 | -2.95061100 | -2.25702300 | C | -5.17498300 | -1.17753300 | -2.52027100 |
| H | 1.48480200  | -2.70269500 | -1.47958600 | C | -3.80058100 | -1.07281500 | -2.73979900 |
| C | 0.45238900  | -5.03031300 | -0.37319400 | C | -3.02041400 | -0.26192900 | -1.91506700 |
| H | -0.70957800 | -3.43645400 | 0.51447400  | C | -3.60655200 | 0.46085800  | -0.86896400 |
| H | 0.99861500  | -3.34295400 | 0.87805000  | C | -2.75944800 | 1.32575400  | 0.01429900  |
| C | -0.30617300 | -4.40852500 | -2.70023600 | C | -2.94501700 | 2.79679400  | -0.10774100 |
| H | -1.51594400 | -2.77928900 | -1.94835500 | C | -2.59413000 | 3.64360700  | 0.95883900  |
| H | -0.28548200 | -2.26953100 | -3.09515900 | C | -2.71703200 | 5.02517400  | 0.84147400  |
| C | -0.49932900 | -5.37417800 | -1.52519200 | C | -3.19889000 | 5.59092100  | -0.34340100 |
| H | 0.28223500  | -5.70202300 | 0.47707600  | C | -3.56479800 | 4.76003500  | -1.40402100 |
| H | 1.48972000  | -5.19512800 | -0.70050500 | C | -3.44630100 | 3.37492500  | -1.28557500 |
| H | -1.01276400 | -4.63803000 | -3.50755000 | N | -1.87084900 | 0.90764100  | 0.85228000  |
| H | 0.70272900  | -4.54487500 | -3.11706800 | H | -5.45261600 | 0.94047500  | 0.12963700  |
| H | -0.34279900 | -6.40966000 | -1.85238000 | H | -6.83722900 | -0.52876000 | -1.30720800 |
| H | -1.53729600 | -5.30714400 | -1.16818300 | H | -3.33221500 | -1.62813500 | -3.54795000 |
| C | 1.42784300  | 2.25709600  | -0.70224400 | H | -1.94767500 | -0.20517000 | -2.06931200 |
| C | 1.48193000  | 3.14589300  | -1.95348100 | H | -2.21875700 | 3.19484000  | 1.87215900  |
| C | 0.79204000  | 3.00924200  | 0.47355200  | H | -2.44169400 | 5.66324300  | 1.67704900  |
| H | 2.43790100  | 1.96515400  | -0.41691000 | H | -3.94283200 | 5.18994100  | -2.32772800 |
| C | 2.20445700  | 4.46978300  | -1.67638400 | H | -3.72996100 | 2.73689800  | -2.11655700 |
| H | 0.44986000  | 3.35083600  | -2.27363000 | H | -3.29642600 | 6.66928100  | -0.43419900 |
| H | 1.96726200  | 2.60373700  | -2.77334700 | H | -5.78197800 | -1.81791200 | -3.15440100 |
| C | 1.52525000  | 4.32625900  | 0.75168700  | C | -0.58054000 | -0.62025400 | 2.16568400  |
| H | -0.25038800 | 3.22869900  | 0.22450800  | O | -0.65334200 | -1.81490500 | 2.80842100  |
| H | 0.77193900  | 2.35882700  | 1.35099300  | O | 0.37545700  | 0.13738300  | 2.33551300  |
| C | 1.56853300  | 5.21570400  | -0.49662200 | C | 0.46356400  | -2.14745500 | 3.64026200  |

|   |             |             |             |   |             |             |             |
|---|-------------|-------------|-------------|---|-------------|-------------|-------------|
| H | 1.39149700  | -2.17309500 | 3.06265900  | H | 0.62887900  | 1.62540900  | -1.32328200 |
| H | 0.24604200  | -3.13915900 | 4.04033600  | C | -0.19112300 | -2.04277700 | -1.26838200 |
| H | 0.56902800  | -1.42925900 | 4.45817800  | C | -0.72996100 | -2.86770000 | -0.08615000 |
| C | -3.23780000 | -2.39129700 | 0.58034600  | C | -1.27531200 | -1.93507900 | -2.35815900 |
| C | -2.88185700 | -1.30330800 | 1.38219700  | H | 0.66955400  | -2.56181500 | -1.71045600 |
| C | -3.75236500 | -0.93882300 | 2.42221900  | C | -1.21013000 | -4.25298300 | -0.53635700 |
| C | -4.94094600 | -1.63164700 | 2.64553200  | H | -1.56045500 | -2.31587900 | 0.36485700  |
| C | -5.28465500 | -2.71259800 | 1.82941700  | H | 0.03273700  | -2.96674100 | 0.69563300  |
| C | -4.42598000 | -3.09059200 | 0.79695400  | C | -1.76129200 | -3.31527700 | -2.81725900 |
| H | -2.59503000 | -2.67810400 | -0.24115700 | H | -2.11923300 | -1.36542900 | -1.94591900 |
| H | -3.49166600 | -0.09373600 | 3.05464100  | H | -0.88147800 | -1.35979700 | -3.20506900 |
| H | -5.59917400 | -1.32878700 | 3.45611700  | C | -2.27460200 | -4.14583600 | -1.63515500 |
| H | -6.21305200 | -3.25222900 | 1.99688300  | H | -1.60801200 | -4.80337600 | 0.32539900  |
| H | -4.68422100 | -3.92434400 | 0.14908900  | H | -0.35534500 | -4.83466300 | -0.91337400 |
| C | -1.64163800 | -0.46556600 | 1.15425500  | H | -2.54635900 | -3.20101900 | -3.57520400 |
| C | 3.16480500  | 1.76396800  | 3.44279500  | H | -0.93056400 | -3.84872200 | -3.30279100 |
| H | 3.20095300  | 2.49552600  | 2.62863200  | H | -2.57479400 | -5.14559000 | -1.97378900 |
| H | 2.11396900  | 1.54757600  | 3.66253300  | H | -3.17198700 | -3.66743100 | -1.21920200 |
| H | 3.61485000  | 2.21901300  | 4.33187100  | C | 2.60757100  | 2.02379800  | -0.73264600 |
| C | 3.94116500  | -0.52466900 | 4.21892200  | C | 3.19710300  | 2.81969400  | -1.90562700 |
| H | 4.46913000  | -0.10768300 | 5.08465000  | C | 2.11068600  | 2.96849900  | 0.37114200  |
| H | 2.92350600  | -0.78354500 | 4.53188200  | H | 3.37614900  | 1.37266500  | -0.31367000 |
| H | 4.45773300  | -1.43982500 | 3.91215900  | C | 4.31056900  | 3.76556300  | -1.43812600 |

### TS3-G2-S

|   |            |             |             |   |            |             |             |
|---|------------|-------------|-------------|---|------------|-------------|-------------|
| C | 4.03600800 | -0.60015700 | 3.03887300  | C | 3.22428100 | 3.91354600  | 0.83845100  |
| H | 5.09341900 | -0.67624600 | 2.76440900  | H | 1.27698400 | 3.56299200  | -0.02398300 |
| C | 3.85368400 | -2.25263100 | -2.47733900 | H | 1.71421700 | 2.37627900  | 1.19918200  |
| H | 3.23698400 | -2.48094400 | -3.35139800 | C | 3.81797000 | 4.70693300  | -0.33177300 |
| N | 1.51867300 | 1.15604600  | -1.19492300 | H | 4.69440100 | 4.34038800  | -2.28997200 |
| N | 0.19465500 | -0.69037800 | -0.86670800 | H | 5.15217800 | 3.16944600  | -1.05641000 |
| N | 2.58037200 | -0.89765400 | -0.98502300 | H | 2.83141900 | 4.59348300  | 1.60454000  |
| C | 1.40389300 | -0.18452300 | -1.00904800 | H | 4.02314500 | 3.32966800  | 1.31822400  |
| C | 2.77388200 | -2.14824600 | -0.24841400 | H | 4.63892800 | 5.34642300  | 0.01623500  |
| H | 1.82193400 | -2.50374400 | 0.13882200  | H | 3.04709900 | 5.37512000  | -0.74257700 |
| O | 4.69424700 | -2.59372700 | 1.19437700  | C | 5.35285200 | -2.33679400 | -2.78991300 |
| C | 3.68244200 | -1.91688900 | 0.98910800  | H | 5.72685400 | -3.36639000 | -2.79267400 |
| N | 3.27680100 | -0.93786600 | 1.82804500  | H | 5.54607200 | -1.91288100 | -3.78427400 |
| H | 2.38487700 | -0.46720500 | 1.68975700  | C | 5.02326600 | -0.27934000 | -1.53449400 |
| C | 3.62588200 | -0.78414600 | -2.01394600 | H | 5.32797500 | 0.56807500  | -2.15752300 |
| H | 3.24132600 | -0.14601000 | -2.80970200 | H | 4.99007100 | 0.07652500  | -0.50198100 |
| C | 3.39687900 | -3.11880500 | -1.27024400 | C | 6.00130700 | -1.46073000 | -1.70540400 |
| H | 2.65590800 | -3.85801700 | -1.58475300 | H | 7.01141900 | -1.13361400 | -1.97305300 |
| H | 4.23001700 | -3.65102000 | -0.80780300 | H | 6.06956900 | -2.02064500 | -0.76810400 |

|   |             |             |             |                 |             |             |             |
|---|-------------|-------------|-------------|-----------------|-------------|-------------|-------------|
| C | 3.76580600  | -1.59811300 | 4.16963900  | C               | -1.27252700 | 4.29514900  | 1.27801800  |
| H | 4.41382000  | -1.38513100 | 5.02812500  | H               | -1.24160000 | 2.63220600  | 2.64184900  |
| H | 2.72517000  | -1.53781100 | 4.50637600  | H               | -1.55263400 | 1.64438400  | -1.52113200 |
| H | 3.96901600  | -2.61951700 | 3.83421300  | H               | -1.50439500 | 4.04205100  | -2.10491400 |
| C | 3.71539400  | 0.83558000  | 3.44692200  | H               | -1.33107600 | 5.75978000  | -0.30708800 |
| H | 3.98332000  | 1.53978100  | 2.65233100  | H               | -1.19962400 | 5.03622200  | 2.06992300  |
| H | 2.64718200  | 0.95171000  | 3.65753100  | C               | -1.46069500 | 0.48956900  | 0.93451600  |
| H | 4.27739100  | 1.10625200  | 4.34712100  | H               | -0.68794500 | -0.08075300 | -0.04603700 |
| C | -4.37849700 | 1.25963900  | -1.70363900 |                 |             |             |             |
| C | -4.76274900 | 2.42409700  | -2.36869300 |                 |             |             |             |
| C | -5.02659400 | 3.58796200  | -1.64367600 |                 |             |             |             |
| C | -4.91130200 | 3.57818300  | -0.25178800 |                 |             |             |             |
| C | -4.52601500 | 2.41355400  | 0.41112700  |                 |             |             |             |
| C | -4.23749600 | 1.24875500  | -0.30967800 |                 |             |             |             |
| C | -3.80920100 | -0.00523400 | 0.39513800  |                 |             |             |             |
| C | -4.83498300 | -1.08759500 | 0.50526200  |                 |             |             |             |
| C | -4.50696300 | -2.31768600 | 1.10791300  |                 |             |             |             |
| C | -5.44677100 | -3.33752500 | 1.21151800  |                 |             |             |             |
| C | -6.74495500 | -3.15645600 | 0.72119100  |                 |             |             |             |
| C | -7.08786800 | -1.93910200 | 0.13440600  |                 |             |             |             |
| C | -6.14484400 | -0.91491800 | 0.02808800  |                 |             |             |             |
| N | -2.65984100 | -0.24442600 | 0.91838100  |                 |             |             |             |
| H | -4.17257900 | 0.35311000  | -2.26705400 |                 |             |             |             |
| H | -4.85595700 | 2.42270500  | -3.45153700 |                 |             |             |             |
| H | -5.11477600 | 4.48034700  | 0.31843400  |                 |             |             |             |
| H | -4.42605400 | 2.40927900  | 1.49196700  |                 |             |             |             |
| H | -3.50524700 | -2.44762400 | 1.49974300  |                 |             |             |             |
| H | -5.16780600 | -4.27894600 | 1.67798200  |                 |             |             |             |
| H | -8.09453800 | -1.78018800 | -0.24343000 |                 |             |             |             |
| H | -6.43260100 | 0.02555600  | -0.42807500 |                 |             |             |             |
| H | -7.47839200 | -3.95429100 | 0.80045400  |                 |             |             |             |
| H | -5.32222600 | 4.49717800  | -2.16007500 |                 |             |             |             |
| C | -0.53779100 | 0.05493800  | 2.00707900  |                 |             |             |             |
| O | -0.97525100 | -0.99161100 | 2.73890000  |                 |             |             |             |
| O | 0.59858200  | 0.51276500  | 2.16018900  |                 |             |             |             |
| C | -0.01603500 | -1.57038100 | 3.63340300  |                 |             |             |             |
| H | 0.85115900  | -1.94779900 | 3.08606800  |                 |             |             |             |
| H | -0.53613900 | -2.39453400 | 4.12428100  |                 |             |             |             |
| H | 0.31515600  | -0.83993900 | 4.37661300  |                 |             |             |             |
| C | -1.29884900 | 2.93833900  | 1.60116900  |                 |             |             |             |
| C | -1.39596900 | 1.96040000  | 0.60251400  |                 |             |             |             |
| C | -1.45803800 | 2.38543000  | -0.73366600 |                 |             |             |             |
| C | -1.43826700 | 3.74019500  | -1.06325300 |                 |             |             |             |
| C | -1.34492600 | 4.70275000  | -0.05577900 |                 |             |             |             |
|   |             |             |             | <b>TS3-G3-R</b> |             |             |             |
|   |             |             |             | C               | -4.35445900 | -0.33691800 | -0.37430500 |
|   |             |             |             | C               | -4.50606200 | -1.36691000 | -1.49983500 |
|   |             |             |             | C               | -4.64168300 | -1.02373100 | -2.84759600 |
|   |             |             |             | C               | -4.51664900 | -2.72666400 | -1.15094400 |
|   |             |             |             | C               | -4.75720300 | -2.01489900 | -3.82772900 |
|   |             |             |             | H               | -4.65195600 | 0.01883800  | -3.14294100 |
|   |             |             |             | C               | -4.63224800 | -3.71569800 | -2.12474700 |
|   |             |             |             | H               | -4.43777800 | -3.00973300 | -0.10518900 |
|   |             |             |             | C               | -4.74501000 | -3.36258700 | -3.47300800 |
|   |             |             |             | H               | -4.85242300 | -1.72605700 | -4.87104600 |
|   |             |             |             | H               | -4.63652600 | -4.76248800 | -1.83256400 |
|   |             |             |             | H               | -4.82978400 | -4.13194700 | -4.23551400 |
|   |             |             |             | C               | -4.36156500 | 1.11128300  | -0.82704100 |
|   |             |             |             | C               | -5.42610900 | 1.93958200  | -0.45676200 |
|   |             |             |             | C               | -3.34629400 | 1.63609400  | -1.63958800 |
|   |             |             |             | C               | -5.48596200 | 3.26556400  | -0.89208200 |
|   |             |             |             | H               | -6.21760200 | 1.54138300  | 0.17348600  |
|   |             |             |             | C               | -3.40783100 | 2.95797100  | -2.07942900 |
|   |             |             |             | H               | -2.50792300 | 1.00979000  | -1.92428400 |
|   |             |             |             | C               | -4.47823100 | 3.77660900  | -1.71027600 |
|   |             |             |             | H               | -6.32057500 | 3.89452200  | -0.59412200 |
|   |             |             |             | H               | -2.61297900 | 3.34983500  | -2.70829200 |
|   |             |             |             | H               | -4.52200600 | 4.80688000  | -2.05290500 |
|   |             |             |             | H               | -5.19406300 | -0.47477300 | 0.31097400  |
|   |             |             |             | C               | -1.62094100 | -1.54853000 | 4.70889900  |
|   |             |             |             | H               | -0.65253500 | -1.93745000 | 5.04086800  |
|   |             |             |             | N               | 0.32393600  | 1.01373800  | 1.84571100  |
|   |             |             |             | N               | 0.85390600  | -1.17162800 | 1.34775000  |
|   |             |             |             | N               | -1.10701200 | -0.64101400 | 2.60968400  |
|   |             |             |             | C               | 0.03643900  | -0.30557500 | 1.92072000  |
|   |             |             |             | C               | -1.98483500 | -1.76767400 | 2.28485500  |
|   |             |             |             | H               | -1.51589800 | -2.41289200 | 1.54406700  |
|   |             |             |             | O               | -4.39504500 | -1.39926700 | 2.21157500  |
|   |             |             |             | C               | -3.30613600 | -1.25118500 | 1.65086200  |

|   |             |             |             |   |             |             |             |
|---|-------------|-------------|-------------|---|-------------|-------------|-------------|
| N | -3.17247900 | -0.66988500 | 0.43483700  | C | 6.33990400  | 0.38727900  | -0.71052300 |
| H | -2.26648900 | -0.63805700 | -0.03462500 | C | 6.39989700  | -0.27830400 | 0.51646100  |
| C | -1.40666800 | -0.21193900 | 3.98128900  | C | 5.26892700  | -0.32633200 | 1.33273400  |
| H | -0.58346300 | 0.38020000  | 4.38131200  | C | 4.07920900  | 0.27138700  | 0.91572900  |
| C | -2.23932900 | -2.47692900 | 3.63602100  | C | 4.00900600  | 0.93147800  | -0.31740700 |
| H | -1.77680100 | -3.46714100 | 3.64670700  | C | 2.72659800  | 1.56792700  | -0.76203700 |
| H | -3.31377100 | -2.59805800 | 3.77737000  | C | 2.68733700  | 3.05480100  | -0.79168200 |
| H | 1.20146800  | 1.22802500  | 1.38524000  | C | 1.77273500  | 3.71967000  | -1.62748500 |
| C | 0.99355600  | -2.55133400 | 1.81575000  | C | 1.68169900  | 5.10838700  | -1.62054700 |
| C | 0.74406000  | -3.56850400 | 0.69027700  | C | 2.50546200  | 5.86370800  | -0.77940900 |
| C | 2.38721500  | -2.74744000 | 2.44122100  | C | 3.42707800  | 5.21551200  | 0.04504900  |
| H | 0.26933200  | -2.74427400 | 2.61537800  | C | 3.52425200  | 3.82364000  | 0.03330800  |
| C | 0.95231800  | -5.00709200 | 1.17877100  | N | 1.64703200  | 0.94354900  | -1.09532000 |
| H | 1.42159200  | -3.36279800 | -0.14387500 | H | 5.11201900  | 1.51927400  | -2.07034000 |
| H | -0.27036900 | -3.44414600 | 0.29386900  | H | 7.21617000  | 0.42759800  | -1.35164600 |
| C | 2.59165400  | -4.19021700 | 2.92014500  | H | 5.30889200  | -0.83485100 | 2.29228000  |
| H | 3.15594900  | -2.49014600 | 1.70363500  | H | 3.19492200  | 0.20534000  | 1.54115400  |
| H | 2.50394500  | -2.04329900 | 3.27467800  | H | 1.13002000  | 3.12383300  | -2.26647500 |
| C | 2.34786500  | -5.19413400 | 1.78669300  | H | 0.96895900  | 5.60505700  | -2.27361000 |
| H | 0.79998900  | -5.70586800 | 0.34721800  | H | 4.07251900  | 5.79367000  | 0.70089900  |
| H | 0.19295200  | -5.24969300 | 1.93708500  | H | 4.24088800  | 3.32786900  | 0.68043800  |
| H | 3.60358600  | -4.30782400 | 3.32737600  | H | 2.43454800  | 6.94790300  | -0.77404800 |
| H | 1.89447700  | -4.40122500 | 3.74455200  | H | 7.32381200  | -0.75335900 | 0.83465700  |
| H | 2.46841300  | -6.22059900 | 2.15479800  | C | 0.19468200  | -0.88020400 | -1.61000400 |
| H | 3.10486300  | -5.04694200 | 1.00267600  | O | 0.15994500  | -2.08049000 | -2.23591300 |
| C | -0.62274400 | 2.13081400  | 1.95399100  | O | -0.84267600 | -0.29183900 | -1.29645300 |
| C | -0.17906800 | 3.08974100  | 3.06916300  | C | -1.14585200 | -2.63909500 | -2.44646700 |
| C | -0.73951400 | 2.87535300  | 0.61960900  | H | -1.66132600 | -2.79632800 | -1.49695800 |
| H | -1.59624200 | 1.70170800  | 2.20331600  | H | -0.97774500 | -3.59638400 | -2.94208000 |
| C | -1.12290000 | 4.29339500  | 3.18305300  | H | -1.75377000 | -1.98840700 | -3.07860400 |
| H | 0.83655600  | 3.44151600  | 2.83501800  | C | 3.52901900  | -2.09794000 | -1.31651300 |
| H | -0.11857900 | 2.55351700  | 4.02321500  | C | 2.68803100  | -1.16171800 | -1.92486300 |
| C | -1.68644200 | 4.07501600  | 0.73018800  | C | 2.95070000  | -0.80708400 | -3.25816300 |
| H | 0.25596200  | 3.23037600  | 0.33538400  | C | 4.02155300  | -1.36397400 | -3.95519000 |
| H | -1.06217100 | 2.18020300  | -0.15881300 | C | 4.85654100  | -2.29346500 | -3.32921500 |
| C | -1.24793500 | 5.03174000  | 1.84495800  | C | 4.60405400  | -2.65952100 | -2.00708000 |
| H | -0.76642300 | 4.97245600  | 3.96759200  | H | 3.36041600  | -2.36835400 | -0.28262400 |
| H | -2.11709000 | 3.94270500  | 3.49691600  | H | 2.30720900  | -0.07873900 | -3.74540600 |
| H | -1.72161500 | 4.60080100  | -0.23062100 | H | 4.20564900  | -1.07353700 | -4.98654900 |
| H | -2.70737200 | 3.72095400  | 0.92775400  | H | 5.69587400  | -2.72593700 | -3.86732600 |
| H | -1.95712700 | 5.86423000  | 1.93602600  | H | 5.25067200  | -3.37422200 | -1.50445600 |
| H | -0.27411300 | 5.46925900  | 1.58071400  | C | 1.55023300  | -0.47453900 | -1.20269500 |
| H | 1.33245500  | -0.88454800 | 0.14919400  | H | -2.26056300 | -1.43794300 | 5.58920800  |
| C | 5.15749500  | 1.00316000  | -1.11630500 | H | -2.31761600 | 0.39990000  | 4.00264100  |

**TS3-G3-S**

|   |             |             |   |             |             |             |
|---|-------------|-------------|---|-------------|-------------|-------------|
|   |             |             | H | -1.74776500 | 2.12205800  | -0.46449300 |
|   |             |             | C | -3.39262700 | 4.81829400  | 1.02638400  |
| C | -4.23632300 | -1.30906100 | H | -3.51642700 | 5.02925200  | 3.18973500  |
| H | -5.08430400 | -1.60927900 | H | -4.26691700 | 3.56619500  | 2.55590600  |
| N | -0.63508500 | 1.63298100  | H | -3.12058100 | 4.15182000  | -1.02483500 |
| N | 0.65443400  | -0.25681600 | H | -4.02224300 | 3.03305500  | -0.01585600 |
| N | -1.51449900 | -0.37196800 | H | -4.33519000 | 5.34433200  | 0.82821600  |
| C | -0.47391500 | 0.29586700  | H | -2.58944600 | 5.56602500  | 0.94897100  |
| C | -1.92594800 | -1.73980500 | C | 5.09446200  | 1.87078600  | 0.33270300  |
| H | -1.14985200 | -2.25109600 | C | 5.53688700  | 3.18982000  | 0.43481800  |
| O | -4.25273600 | -2.27409800 | C | 5.39961300  | 4.05831800  | -0.65001500 |
| C | -3.21625300 | -1.75222400 | C | 4.82634300  | 3.59832700  | -1.83766400 |
| N | -3.12166300 | -1.19167800 | C | 4.38466000  | 2.27985500  | -1.93789400 |
| H | -2.22629400 | -0.85620200 | C | 4.49793800  | 1.40915000  | -0.84800200 |
| C | -2.16988100 | -2.34944200 | C | 4.00618400  | -0.00482100 | -0.94268700 |
| H | -1.20600600 | -2.64447700 | C | 5.05045200  | -1.06945600 | -1.05286300 |
| H | -2.82227600 | -3.22186200 | C | 4.67568400  | -2.42554400 | -1.12103200 |
| H | 0.19776000  | 2.10994200  | C | 5.63314600  | -3.42910800 | -1.22187600 |
| C | 1.22870200  | -1.46195100 | C | 6.99459200  | -3.10744700 | -1.26206700 |
| C | 1.40749600  | -2.59304800 | C | 7.37983300  | -1.76871600 | -1.20902400 |
| C | 2.59546800  | -1.09973700 | C | 6.41957400  | -0.76005900 | -1.10766400 |
| H | 0.58528300  | -1.81578800 | N | 2.78197700  | -0.39624600 | -0.95041500 |
| C | 2.07651600  | -3.82121000 | H | 5.19791000  | 1.19307300  | 1.17615500  |
| H | 2.02456000  | -2.21590600 | H | 5.98633300  | 3.53951200  | 1.36050900  |
| H | 0.44245200  | -2.87049600 | H | 4.71593200  | 4.26928500  | -2.68495100 |
| C | 3.27834600  | -2.32015300 | H | 3.92958800  | 1.92455400  | -2.85694500 |
| H | 3.23147100  | -0.69199700 | H | 3.61999200  | -2.66916300 | -1.10521600 |
| H | 2.45942800  | -0.30358600 | H | 5.31823300  | -4.46844700 | -1.27076400 |
| C | 3.42928800  | -3.45933900 | H | 8.43283400  | -1.50198200 | -1.24775100 |
| H | 2.20513400  | -4.60224000 | H | 6.74089800  | 0.27470300  | -1.07348500 |
| H | 1.41828700  | -4.24101500 | H | 7.74237400  | -3.89217500 | -1.33805800 |
| H | 4.25814400  | -2.03295600 | H | 5.73910200  | 5.08751400  | -0.57154300 |
| H | 2.67875800  | -2.67097700 | C | 0.41399500  | -0.45816400 | -1.33347900 |
| H | 3.87510100  | -4.34018800 | O | 0.71385700  | -1.65067200 | -1.88058200 |
| H | 4.11944500  | -3.14568400 | O | -0.75708700 | -0.08761800 | -1.19578000 |
| C | -1.89308900 | 2.34059000  | C | -0.40307000 | -2.48756100 | -2.21853700 |
| C | -2.11635400 | 3.44111700  | H | -1.00709300 | -2.70983500 | -1.33741600 |
| C | -1.88238800 | 2.92970900  | H | 0.03252200  | -3.40671400 | -2.61243800 |
| H | -2.69831100 | 1.60331800  | H | -1.03215400 | -2.01596100 | -2.97627100 |
| C | -3.39938900 | 4.23312800  | C | 0.91038300  | 2.41757300  | -2.03184900 |
| H | -1.25234400 | 4.12088800  | C | 1.44821900  | 1.79445700  | -0.89794400 |
| H | -2.14039000 | 3.00273700  | C | 1.90599500  | 2.61006600  | 0.14876800  |
| C | -3.16609300 | 3.71987700  | C | 1.85183900  | 4.00043600  | 0.05817000  |
| H | -1.01531400 | 3.59526600  | C | 1.32044800  | 4.60657100  | -1.08235100 |

|   |             |             |             |   |             |             |             |
|---|-------------|-------------|-------------|---|-------------|-------------|-------------|
| C | 0.84518000  | 3.80809700  | -2.12485700 | C | -4.16147500 | -3.27182000 | -3.45407500 |
| H | 0.54136300  | 1.80634200  | -2.85058900 | H | -4.30990800 | -2.84287200 | -1.35334500 |
| H | 2.33832800  | 2.14623400  | 1.03002400  | C | -4.02340900 | -2.74229500 | -4.74091100 |
| H | 2.23065100  | 4.60880000  | 0.87476900  | H | -3.83522400 | -0.93497100 | -5.89982000 |
| H | 1.27738800  | 5.68963100  | -1.15768100 | H | -4.24870500 | -4.34579400 | -3.31238700 |
| H | 0.42667000  | 4.26884200  | -3.01602400 | H | -3.99550200 | -3.40115100 | -5.60438600 |
| C | 1.56677100  | 0.29354400  | -0.79246800 | C | -4.01215900 | 1.32716400  | -1.48631100 |
| H | 1.18622400  | 0.06340100  | 0.50508600  | C | -5.11981200 | 2.12903300  | -1.19225500 |
| C | -3.96453900 | -2.45484500 | -1.64109300 | C | -2.87155600 | 1.92537700  | -2.04191400 |
| C | -3.62870500 | -3.71391000 | -1.11778700 | C | -5.09971600 | 3.50096700  | -1.45419000 |
| C | -4.04140500 | -2.31056900 | -3.02920800 | H | -6.00789000 | 1.67395000  | -0.76037900 |
| C | -3.34321600 | -4.78656200 | -1.95910300 | C | -2.85352800 | 3.29335400  | -2.31115800 |
| H | -3.59793000 | -3.85430300 | -0.04183900 | H | -1.99918600 | 1.32051800  | -2.26419200 |
| C | -3.75435200 | -3.38616300 | -3.87587800 | C | -3.96718400 | 4.08574500  | -2.02124900 |
| H | -4.31818000 | -1.35604600 | -3.46093000 | H | -5.96957300 | 4.10824900  | -1.21857200 |
| C | -3.39497600 | -4.62419200 | -3.34683100 | H | -1.96310500 | 3.74154700  | -2.74347800 |
| H | -3.08135400 | -5.75088300 | -1.53179300 | H | -3.94848300 | 5.15197500  | -2.22991200 |
| H | -3.80955900 | -3.24774800 | -4.95232000 | H | -5.02508300 | -0.37151700 | -0.71030200 |
| H | -3.16629600 | -5.45773300 | -4.00511700 | C | -2.22686900 | -1.94373300 | 4.01601300  |
| C | -4.58764900 | 0.01292300  | -1.31326600 | H | -1.38898100 | -2.37871300 | 4.56875600  |
| C | -3.66481800 | 0.71554200  | -2.10146400 | N | 0.21738400  | 0.85809300  | 1.74928100  |
| C | -5.88638200 | 0.51669700  | -1.18526300 | N | 0.80914700  | -1.28259800 | 1.16942800  |
| C | -4.04393900 | 1.88465200  | -2.75962600 | N | -1.35631400 | -0.81457400 | 2.09882700  |
| H | -2.65027200 | 0.34606400  | -2.19760900 | C | -0.09504200 | -0.45434800 | 1.66383700  |
| C | -6.26595300 | 1.69123500  | -1.83954300 | C | -2.11517400 | -1.93672300 | 1.54013900  |
| H | -6.60933300 | -0.02095900 | -0.57676500 | H | -1.49839700 | -2.48125000 | 0.82732000  |
| C | -5.34646800 | 2.37445600  | -2.63560000 | O | -4.49245900 | -1.78174900 | 1.00911800  |
| H | -3.31669700 | 2.41644800  | -3.36712500 | C | -3.34084600 | -1.42999500 | 0.73386500  |
| H | -7.27997600 | 2.06627600  | -1.73049400 | N | -3.04427900 | -0.61992300 | -0.30759700 |
| H | -5.63888600 | 3.28573000  | -3.15008200 | H | -2.07407900 | -0.47371400 | -0.58990900 |
| C | -2.78972300 | -1.18238500 | 4.56169400  | C | -1.84759100 | -0.54054800 | 3.46007600  |
| H | -2.56426600 | -1.23456900 | 5.63004100  | H | -1.03651500 | -0.07762700 | 4.02230800  |
| H | -3.87566000 | -1.19792500 | 4.44315600  | C | -2.52561200 | -2.79612600 | 2.75294900  |
| C | -2.20805200 | 0.10246000  | 3.92137700  | H | -1.95336600 | -3.72701300 | 2.76785300  |
| H | -3.00646400 | 0.81251800  | 3.68672800  | H | -3.58305500 | -3.05355600 | 2.67538200  |
| H | -1.48784400 | 0.61112600  | 4.56803300  | H | 1.17503300  | 1.07972200  | 1.50162100  |

### TS3-R

|   |             |             |             |   |             |             |             |
|---|-------------|-------------|-------------|---|-------------|-------------|-------------|
| C | -4.08989800 | -0.16712700 | -1.23700300 | C | 0.89592300  | -2.68859500 | 1.56679800  |
| C | -4.07858200 | -1.03393500 | -2.50204900 | C | 0.84382600  | -3.63994100 | 0.35952400  |
| C | -3.96419100 | -0.51277100 | -3.79356000 | C | 2.18231100  | -2.90593900 | 2.38696400  |
| C | -4.19148600 | -2.42506800 | -2.34858600 | H | 0.06146900  | -2.93434400 | 2.23245400  |
| C | -3.93311700 | -1.36137500 | -4.90509200 | C | 1.01812100  | -5.10267600 | 0.78759900  |
| H | -3.89312800 | 0.55846500  | -3.94164800 | H | 1.63030300  | -3.36878700 | -0.35090500 |
|   |             |             |             | H | -0.10402600 | -3.51469500 | -0.17670100 |
|   |             |             |             | C | 2.34867100  | -4.37170400 | 2.80558800  |

|   |             |             |             |                 |             |             |             |
|---|-------------|-------------|-------------|-----------------|-------------|-------------|-------------|
| H | 3.04705500  | -2.59233100 | 1.79092200  | C               | 2.17630500  | 3.80843200  | -1.32236800 |
| H | 2.15557100  | -2.25316000 | 3.26844000  | C               | 2.10189100  | 5.19605600  | -1.25152200 |
| C | 2.30992300  | -5.30412800 | 1.58932300  | C               | 2.85938600  | 5.89506200  | -0.30564300 |
| H | 1.01136900  | -5.74977300 | -0.09785000 | C               | 3.69938700  | 5.19110400  | 0.55881800  |
| H | 0.16050000  | -5.40714500 | 1.40571500  | C               | 3.77869500  | 3.79990500  | 0.48481900  |
| H | 3.28874800  | -4.49732800 | 3.35719700  | N               | 1.98362600  | 1.01215400  | -0.97744900 |
| H | 1.53881100  | -4.64745800 | 3.49707100  | H               | 5.55960300  | 1.60382600  | -1.49047400 |
| H | 2.40105200  | -6.35020800 | 1.90736700  | H               | 7.54554800  | 0.42776200  | -0.59111200 |
| H | 3.17364800  | -5.09194700 | 0.94281100  | H               | 5.17844200  | -1.05217100 | 2.68315200  |
| C | -0.70565100 | 1.99492700  | 1.80885400  | H               | 3.18867000  | 0.07668200  | 1.74746300  |
| C | -0.52769400 | 2.76173100  | 3.12928400  | H               | 1.58499300  | 3.25658800  | -2.04493200 |
| C | -0.48859200 | 2.92819700  | 0.61405200  | H               | 1.45413500  | 5.73648400  | -1.93682900 |
| H | -1.71495000 | 1.58539200  | 1.75255900  | H               | 4.29372300  | 5.72450500  | 1.29589900  |
| C | -1.45195500 | 3.98331800  | 3.20029800  | H               | 4.43044900  | 3.26136200  | 1.16548000  |
| H | 0.52001300  | 3.08958200  | 3.19610400  | H               | 2.80112500  | 6.97863500  | -0.25047700 |
| H | -0.70599400 | 2.09347200  | 3.97872800  | H               | 7.36416200  | -0.90452500 | 1.50144200  |
| C | -1.42092900 | 4.14190400  | 0.68175000  | C               | 0.58273400  | -0.72909400 | -1.80153500 |
| H | 0.55055700  | 3.27341000  | 0.62472100  | O               | 0.60655000  | -1.88413200 | -2.50695200 |
| H | -0.62855400 | 2.36738800  | -0.31319800 | O               | -0.47286900 | -0.12658800 | -1.59453400 |
| C | -1.24520700 | 4.91014500  | 1.99626200  | C               | -0.66920200 | -2.37322500 | -2.94854200 |
| H | -1.28087000 | 4.52462800  | 4.13930600  | H               | -1.30644700 | -2.62152500 | -2.09712100 |
| H | -2.49743800 | 3.64301000  | 3.21818100  | H               | -0.45340600 | -3.27342400 | -3.52573600 |
| H | -1.22655300 | 4.79933200  | -0.17350700 | H               | -1.17794700 | -1.63598300 | -3.57254100 |
| H | -2.46272700 | 3.80836100  | 0.58803700  | C               | 3.83910700  | -2.04345200 | -1.14494600 |
| H | -1.94500700 | 5.75413100  | 2.04312800  | C               | 3.08898400  | -1.06303000 | -1.80086200 |
| H | -0.23092500 | 5.33400300  | 2.03368900  | C               | 3.51812200  | -0.64417500 | -3.07084300 |
| C | -3.44523000 | -1.69138300 | 4.91292400  | C               | 4.66298600  | -1.17958100 | -3.65839600 |
| H | -4.03104300 | -2.59898600 | 5.09518400  | C               | 5.40601700  | -2.15259300 | -2.98451300 |
| H | -3.11320200 | -1.31175700 | 5.88838800  | C               | 4.98758100  | -2.58363100 | -1.72567900 |
| C | -3.14612400 | 0.31660000  | 3.56782300  | H               | 3.54246900  | -2.36437000 | -0.15533500 |
| H | -2.95679100 | 1.16876200  | 4.22911300  | H               | 2.94644600  | 0.11785200  | -3.59493700 |
| H | -3.44070900 | 0.72244200  | 2.59683200  | H               | 4.97673800  | -0.83844200 | -4.64187800 |
| C | -4.23282800 | -0.60516900 | 4.16032300  | H               | 6.30264800  | -2.56826600 | -3.43673400 |
| H | -4.93376800 | -0.06705900 | 4.80660800  | H               | 5.56002400  | -3.33358800 | -1.18582100 |
| H | -4.80911100 | -1.06015100 | 3.34968800  | C               | 1.87869000  | -0.39317900 | -1.18747000 |
| H | 1.46760800  | -0.90242400 | 0.08693500  |                 |             |             |             |
| C | 5.47887100  | 1.02234000  | -0.57700800 | <b>TS3-R-1b</b> |             |             |             |
| C | 6.59468100  | 0.35853900  | -0.06991500 | C               | -4.12588300 | -0.16632300 | -1.07788600 |
| C | 6.49234800  | -0.39213600 | 1.10396400  | C               | -4.21051500 | -1.26909600 | -2.14037700 |
| C | 5.26627200  | -0.47698900 | 1.76532300  | C               | -4.21027700 | -1.01173300 | -3.51424800 |
| C | 4.14552500  | 0.16986000  | 1.24495900  | C               | -4.31657000 | -2.60112600 | -1.70918100 |
| C | 4.23750600  | 0.91609200  | 0.06357600  | C               | -4.28609300 | -2.05980600 | -4.43706000 |
| C | 3.02403300  | 1.59969600  | -0.49038700 | H               | -4.14864000 | 0.00852900  | -3.87414400 |
| C | 3.00643100  | 3.08654700  | -0.44604300 | C               | -4.39746600 | -3.64615100 | -2.62666200 |



|   |             |             |             |   |             |             |             |
|---|-------------|-------------|-------------|---|-------------|-------------|-------------|
| H | -4.34779600 | -2.81692200 | -0.64565200 | H | 2.17899100  | -1.75734000 | 3.56694100  |
| C | -4.37430900 | -3.37974300 | -3.99926500 | C | 2.05010500  | -5.02131900 | 2.34963700  |
| H | -4.27508700 | -1.83677100 | -5.50060100 | H | 0.65330000  | -5.61134700 | 0.79073300  |
| H | -4.48038600 | -4.66986700 | -2.27123100 | H | -0.10858200 | -4.99587600 | 2.25512700  |
| H | -4.43181800 | -4.19355100 | -4.71689500 | H | 3.16033700  | -4.03771700 | 3.94088200  |
| C | -3.98018200 | 1.24045800  | -1.62755400 | H | 1.41299100  | -4.03817200 | 4.16456900  |
| C | -5.00771500 | 2.16703000  | -1.42298400 | H | 2.08653700  | -6.01319700 | 2.81692400  |
| C | -2.85282300 | 1.63130900  | -2.36430200 | H | 2.89491100  | -4.96907900 | 1.64773600  |
| C | -4.92293600 | 3.45763200  | -1.95093700 | C | -0.58847200 | 2.38850600  | 1.46114800  |
| H | -5.88457600 | 1.87302200  | -0.85132500 | C | -0.29918800 | 3.39792000  | 2.58303900  |
| C | -2.76866400 | 2.91792000  | -2.89501200 | C | -0.42232400 | 3.04455200  | 0.08739800  |
| H | -2.04041100 | 0.92956600  | -2.51618700 | H | -1.61115100 | 2.02123000  | 1.54930000  |
| C | -3.80434000 | 3.83419500  | -2.69476600 | C | -1.16817900 | 4.65491300  | 2.45009600  |
| H | -5.73142600 | 4.16396900  | -1.78309000 | H | 0.76293700  | 3.67850600  | 2.52579400  |
| H | -1.88765100 | 3.20539300  | -3.46236500 | H | -0.45051900 | 2.92479200  | 3.55992800  |
| H | -3.73535800 | 4.83626500  | -3.10922000 | C | -1.29900700 | 4.29469500  | -0.04344200 |
| H | -5.05092400 | -0.20412700 | -0.49715400 | H | 0.62666400  | 3.33079500  | -0.03681000 |
| C | -2.16877800 | -1.00332300 | 4.39548000  | H | -0.64770100 | 2.31349500  | -0.69249200 |
| H | -1.32809600 | -1.37985600 | 4.98568200  | C | -1.00166700 | 5.30381700  | 1.07115100  |
| N | 0.29450300  | 1.22492500  | 1.59102800  | H | -0.91673700 | 5.36634700  | 3.24646000  |
| N | 0.78962400  | -1.00790800 | 1.38782700  | H | -2.22305700 | 4.37960900  | 2.59354900  |
| N | -1.32254600 | -0.29083200 | 2.28090900  | H | -1.13707600 | 4.75253100  | -1.02627100 |
| C | -0.06847200 | -0.06809700 | 1.74657200  | H | -2.35865000 | 4.00780400  | -0.00572100 |
| C | -2.15450900 | -1.45179100 | 1.95659500  | H | -1.65847300 | 6.17845000  | 0.98134500  |
| H | -1.59134900 | -2.15364900 | 1.34447600  | H | 0.03070400  | 5.66776400  | 0.96294300  |
| O | -4.53646000 | -1.24501600 | 1.46569100  | C | -3.33029200 | -0.52639700 | 5.27592600  |
| C | -3.37693200 | -1.03617300 | 1.09523200  | H | -3.94758100 | -1.35258000 | 5.64534000  |
| N | -3.07292800 | -0.48161000 | -0.10096200 | H | -2.93515600 | 0.00698400  | 6.15053400  |
| H | -2.10547100 | -0.43596900 | -0.42480200 | C | -3.00353700 | 1.17970400  | 3.56791300  |
| C | -1.74798500 | 0.25260600  | 3.58130700  | H | -2.74858500 | 2.13265500  | 4.04326800  |
| H | -0.89672000 | 0.77039400  | 4.02331900  | H | -3.32434700 | 1.40560000  | 2.54781700  |
| C | -2.56943200 | -2.04718000 | 3.31776300  | C | -4.10156900 | 0.44476900  | 4.36584500  |
| H | -2.05826700 | -2.99802700 | 3.48770400  | H | -4.74266800 | 1.13146100  | 4.92824000  |
| H | -3.64368200 | -2.23801900 | 3.31811200  | H | -4.73982200 | -0.11791600 | 3.67798000  |
| H | 1.24261000  | 1.35792800  | 1.25830600  | H | 1.45147500  | -0.83662800 | 0.25262500  |
| C | 0.81233300  | -2.33997300 | 1.99281400  | C | 5.52825300  | 0.71337700  | -0.68634100 |
| C | 0.64928400  | -3.45119300 | 0.94087900  | C | 6.60597900  | 0.06013500  | -0.09132300 |
| C | 2.11893900  | -2.52708000 | 2.78770400  | C | 6.47153400  | -0.50300600 | 1.18016500  |
| H | -0.00348900 | -2.42831800 | 2.71864000  | C | 5.25115800  | -0.41114400 | 1.85082200  |
| C | 0.74046100  | -4.84591000 | 1.57171200  | C | 4.16625300  | 0.22293100  | 1.24475800  |
| H | 1.42625700  | -3.34279600 | 0.17821200  | C | 4.29062100  | 0.78170100  | -0.03323200 |
| H | -0.30557300 | -3.33448000 | 0.41536400  | C | 3.11599300  | 1.45704000  | -0.67640400 |
| C | 2.20635500  | -3.92604100 | 3.41067900  | C | 3.18944000  | 2.93480900  | -0.82974700 |
| H | 2.97369400  | -2.36519000 | 2.12141400  | C | 2.40344900  | 3.58533900  | -1.79778200 |

|                 |             |             |             |   |             |             |             |
|-----------------|-------------|-------------|-------------|---|-------------|-------------|-------------|
| C               | 2.41849300  | 4.97208000  | -1.91295800 | H | -3.06048100 | -0.08553500 | -3.65581800 |
| C               | 3.22352800  | 5.74045700  | -1.06545100 | C | -5.11259100 | -3.24776400 | -2.76824100 |
| C               | 4.02013900  | 5.10550400  | -0.11101600 | H | -5.38831000 | -2.33319400 | -0.83604100 |
| C               | 4.01014500  | 3.71484300  | 0.00130400  | C | -4.53363700 | -3.12668400 | -4.03460600 |
| N               | 2.03911800  | 0.87058900  | -1.08190800 | H | -3.34022900 | -1.87925800 | -5.32676500 |
| H               | 5.63439400  | 1.14817900  | -1.67553400 | H | -5.69768800 | -4.12876400 | -2.51789100 |
| H               | 7.55268000  | -0.00899000 | -0.62008700 | H | -4.66477000 | -3.91181100 | -4.77430600 |
| H               | 5.13976000  | -0.83877700 | 2.84360500  | C | -3.83905800 | 1.38142700  | -1.56297900 |
| H               | 3.21191800  | 0.26663900  | 1.75878700  | C | -4.96162200 | 2.21581200  | -1.63130700 |
| H               | 1.77494600  | 2.98077300  | -2.44263100 | C | -2.61139800 | 1.86167900  | -2.03933600 |
| H               | 1.80335500  | 5.45676200  | -2.66653000 | C | -4.86887600 | 3.49993800  | -2.16941400 |
| H               | 4.65079000  | 5.69323300  | 0.55075100  | H | -5.91784600 | 1.85160100  | -1.26340000 |
| H               | 4.62954900  | 3.23086300  | 0.74966300  | C | -2.51983600 | 3.14442000  | -2.58269000 |
| H               | 3.23516000  | 6.82320500  | -1.15536200 | H | -1.72504900 | 1.23880400  | -1.99121500 |
| H               | 7.31425500  | -1.00667700 | 1.64571300  | C | -3.64496100 | 3.96768900  | -2.65114000 |
| C               | 0.54370100  | -0.91664300 | -1.62240600 | H | -5.75104800 | 4.13321700  | -2.21014500 |
| O               | 0.51774600  | -2.16060100 | -2.15160500 | H | -1.56005400 | 3.50180400  | -2.94521800 |
| O               | -0.48805200 | -0.25595700 | -1.47835100 | H | -3.56782400 | 4.96706100  | -3.07071200 |
| C               | -0.78349300 | -2.70009700 | -2.46950300 | H | -4.92565800 | -0.04264100 | -0.42477500 |
| H               | -1.41262000 | -2.66463500 | -1.57650400 | C | -2.08116800 | -1.37988000 | 4.34706400  |
| H               | -1.25707700 | -2.07693900 | -3.23348700 | H | -1.22862200 | -1.78866800 | 4.89775800  |
| C               | 3.72210700  | -2.29716000 | -0.86015100 | N | 0.30793800  | 1.23747600  | 1.78112800  |
| C               | 3.03158500  | -1.34783600 | -1.61824700 | N | 0.89757900  | -0.96456400 | 1.46501800  |
| C               | 3.47952500  | -1.09554000 | -2.92533400 | N | -1.25931400 | -0.38113000 | 2.33889500  |
| C               | 4.58486000  | -1.76182400 | -3.45091300 | C | -0.00125200 | -0.07416700 | 1.85549800  |
| C               | 5.26873400  | -2.70245900 | -2.67576400 | C | -2.02180900 | -1.54529600 | 1.87248900  |
| C               | 4.83080000  | -2.96817200 | -1.37836300 | H | -1.40239600 | -2.13958300 | 1.20197300  |
| H               | 3.41039400  | -2.49194700 | 0.15746900  | O | -4.40897200 | -1.29234800 | 1.42131000  |
| H               | 2.95420600  | -0.35899500 | -3.52820200 | C | -3.25171600 | -1.08175600 | 1.04566800  |
| H               | 4.91312100  | -1.54799600 | -4.46509600 | N | -2.95348300 | -0.43716100 | -0.10724400 |
| H               | 6.13500500  | -3.21962400 | -3.07986400 | H | -1.99692200 | -0.44618300 | -0.46465900 |
| H               | 5.35845200  | -3.69016100 | -0.76044300 | C | -1.70739400 | -0.01756700 | 3.69324200  |
| C               | 1.86450100  | -0.54449000 | -1.08732800 | H | -0.87419200 | 0.47080400  | 4.20004000  |
| C               | -0.57500600 | -4.11930700 | -2.95309800 | C | -2.42829300 | -2.30700900 | 3.14995700  |
| H               | -1.54140700 | -4.56155300 | -3.21568300 | H | -1.88404300 | -3.25218400 | 3.21749400  |
| H               | 0.06664300  | -4.13965400 | -3.84052200 | H | -3.49453200 | -2.53536100 | 3.11251600  |
| H               | -0.10832100 | -4.73561100 | -2.17690000 | H | 1.26920500  | 1.43502700  | 1.52947400  |
|                 |             |             |             | C | 1.00563600  | -2.27744800 | 2.10775000  |
|                 |             |             |             | C | 0.94918600  | -3.43401700 | 1.09977800  |
| <b>TS3-R-1c</b> |             |             |             | C | 2.30440600  | -2.33055300 | 2.93474700  |
| C               | -4.02005900 | -0.02999000 | -1.03309200 | H | 0.17848400  | -2.40442700 | 2.81549500  |
| C               | -4.20202200 | -1.08627000 | -2.12695200 | C | 1.12803000  | -4.79001000 | 1.79316800  |
| C               | -3.63029300 | -0.97123100 | -3.39766000 | H | 1.73051600  | -3.30255300 | 0.34445300  |
| C               | -4.94609600 | -2.23601300 | -1.82339200 | H | -0.00060400 | -3.41054500 | 0.55992400  |
| C               | -3.79263900 | -1.98565000 | -4.34438900 |   |             |             |             |

|   |             |             |             |   |             |             |             |
|---|-------------|-------------|-------------|---|-------------|-------------|-------------|
| C | 2.48687000  | -3.69173800 | 3.61780000  | C | 2.83888900  | 3.02937100  | -0.95902700 |
| H | 3.15719300  | -2.12913400 | 2.27542600  | C | 1.98123200  | 3.53867300  | -1.94978300 |
| H | 2.28617200  | -1.52497700 | 3.67959200  | C | 1.82123400  | 4.91073600  | -2.11572000 |
| C | 2.42951700  | -4.83906700 | 2.60183100  | C | 2.51791800  | 5.80498200  | -1.29576600 |
| H | 1.11068500  | -5.59236400 | 1.04538200  | C | 3.38820800  | 5.31120600  | -0.32214800 |
| H | 0.27738200  | -4.97035100 | 2.46753600  | C | 3.55624500  | 3.93494000  | -0.16132800 |
| H | 3.43746400  | -3.70980700 | 4.16526700  | N | 1.91033500  | 0.85608000  | -1.09827800 |
| H | 1.69133300  | -3.83163800 | 4.36465800  | H | 5.43361100  | 1.51203300  | -1.80342100 |
| H | 2.52511900  | -5.80486400 | 3.11351000  | H | 7.50515600  | 0.62370600  | -0.77471000 |
| H | 3.28395100  | -4.75829800 | 1.91438500  | H | 5.30086000  | -0.37653400 | 2.78215400  |
| C | -0.61632800 | 2.37286500  | 1.72815600  | H | 3.22753900  | 0.45020600  | 1.72344100  |
| C | -0.46519900 | 3.25707100  | 2.97581600  | H | 1.43764000  | 2.83495400  | -2.57077800 |
| C | -0.37518300 | 3.19674400  | 0.45978900  | H | 1.15484400  | 5.28689300  | -2.88765100 |
| H | -1.62424100 | 1.95499100  | 1.69058100  | H | 3.93739600  | 5.99838900  | 0.31606400  |
| C | -1.40372600 | 4.46864000  | 2.91692900  | H | 4.22987600  | 3.55876700  | 0.60235500  |
| H | 0.57765300  | 3.60215400  | 3.02938400  | H | 2.39080800  | 6.87651600  | -1.42310000 |
| H | -0.65153000 | 2.66776200  | 3.87984400  | H | 7.44823500  | -0.32173300 | 1.52499000  |
| C | -1.32224600 | 4.39883800  | 0.39260100  | C | 0.59525500  | -1.04929000 | -1.63675300 |
| H | 0.66035200  | 3.55527000  | 0.46464300  | O | 0.67912300  | -2.30008700 | -2.14208400 |
| H | -0.48353500 | 2.55099500  | -0.41465100 | O | -0.47598800 | -0.43945700 | -1.59051300 |
| C | -1.18542100 | 5.28455100  | 1.63643100  | C | -0.50122000 | -2.84356500 | -2.80087200 |
| H | -1.25592800 | 5.09618900  | 3.80447800  | H | -1.04702400 | -2.00462000 | -3.23583300 |
| H | -2.44526000 | 4.11799400  | 2.94839400  | C | 3.91224900  | -2.08736000 | -0.75469400 |
| H | -1.11284400 | 4.97745900  | -0.51443700 | C | 3.10607000  | -1.27730100 | -1.55901400 |
| H | -2.35768500 | 4.04387600  | 0.30567300  | C | 3.50698200  | -1.06369300 | -2.88851700 |
| H | -1.89746400 | 6.11822000  | 1.59210300  | C | 4.67705700  | -1.62913200 | -3.39099800 |
| H | -0.17807800 | 5.72573100  | 1.65435000  | C | 5.47653900  | -2.42836300 | -2.56905800 |
| C | -3.26598800 | -1.05810900 | 5.26651700  | C | 5.08709900  | -2.65650600 | -1.24956900 |
| H | -3.85559900 | -1.94541100 | 5.52214000  | H | 3.63765800  | -2.25104400 | 0.27909400  |
| H | -2.89645900 | -0.62657100 | 6.20635200  | H | 2.89166100  | -0.43604700 | -3.52846200 |
| C | -2.99244000 | 0.86001500  | 3.78885700  | H | 4.96667100  | -1.44625600 | -4.42289400 |
| H | -2.77289100 | 1.75139300  | 4.38594600  | H | 6.39365500  | -2.86594800 | -2.95457300 |
| H | -3.31448700 | 1.20413200  | 2.80299500  | H | 5.70289100  | -3.26928700 | -0.59623400 |
| C | -4.06722200 | -0.00768900 | 4.47745700  | C | 1.86492600  | -0.56754500 | -1.05914300 |
| H | -4.73537100 | 0.57975100  | 5.11560400  | C | 0.02511700  | -3.75913100 | -3.89355600 |
| H | -4.67886200 | -0.50206200 | 3.71788700  | H | -0.81107800 | -4.17279000 | -4.46775000 |
| H | 1.49131600  | -0.81342500 | 0.30595500  | H | 0.67932100  | -3.20905300 | -4.57785300 |
| C | 5.40756900  | 1.09838200  | -0.79984300 | H | 0.59569500  | -4.59101900 | -3.46493100 |
| C | 6.57153800  | 0.59756500  | -0.21947400 | C | -1.39551200 | -3.56180000 | -1.80206400 |
| C | 6.53938600  | 0.06417200  | 1.07143900  | H | -1.74662000 | -2.87774100 | -1.02598900 |
| C | 5.33487300  | 0.03204300  | 1.77565100  | H | -2.27580800 | -3.95893900 | -2.31689800 |
| C | 4.16668200  | 0.51354300  | 1.18461000  | H | -0.86286100 | -4.39610100 | -1.33259500 |
| C | 4.18847300  | 1.04232800  | -0.11212700 |   |             |             |             |
| C | 2.93115900  | 1.56084100  | -0.74391900 |   |             |             |             |

**TS3-R-1d**

|   |             |             |             |   |             |             |             |
|---|-------------|-------------|-------------|---|-------------|-------------|-------------|
| C | -3.69949300 | 1.08732600  | -0.21776600 | C | 2.18975300  | -3.82273900 | 1.29734700  |
| C | -4.40666000 | 0.48747300  | -1.43807400 | H | 0.15481300  | -3.32223400 | 1.71699500  |
| C | -4.13267700 | 0.88077900  | -2.75134100 | C | 0.12005900  | -5.38856900 | -0.10919300 |
| C | -5.35863600 | -0.52023600 | -1.22105800 | H | 0.98433400  | -3.73018400 | -1.19149700 |
| C | -4.78854200 | 0.27492600  | -3.82648500 | H | -0.65591500 | -3.43485300 | -0.65060300 |
| H | -3.41175200 | 1.66801400  | -2.94131600 | C | 2.02637900  | -5.32736500 | 1.54992700  |
| C | -6.01668100 | -1.12290700 | -2.29188700 | H | 2.91994600  | -3.65973000 | 0.49393400  |
| H | -5.57205800 | -0.83123800 | -0.20274300 | H | 2.58173900  | -3.32443800 | 2.19241500  |
| C | -5.73258800 | -0.72742900 | -3.60219300 | C | 1.43875400  | -6.03974000 | 0.32577900  |
| H | -4.56177500 | 0.59371900  | -4.84042100 | H | -0.26409100 | -5.86986700 | -1.01719200 |
| H | -6.75538300 | -1.89770100 | -2.10395600 | H | -0.63721900 | -5.54490700 | 0.67335200  |
| H | -6.24698300 | -1.19256200 | -4.43873900 | H | 2.99401800  | -5.76738800 | 1.82120600  |
| C | -3.18878600 | 2.50045800  | -0.43149100 | H | 1.35958900  | -5.47905000 | 2.41155100  |
| C | -3.96359400 | 3.56765700  | 0.03928600  | H | 1.28631100  | -7.10465000 | 0.54115700  |
| C | -2.01094700 | 2.78217700  | -1.13745800 | H | 2.15846500  | -5.98317300 | -0.50362300 |
| C | -3.57970400 | 4.88938700  | -0.19209400 | C | 0.69769400  | 1.63802000  | 2.03554100  |
| H | -4.87917100 | 3.35966500  | 0.58789700  | C | 1.33882400  | 2.08177500  | 3.36003700  |
| C | -1.63004400 | 4.10407300  | -1.37377700 | C | 0.93944500  | 2.68598300  | 0.94542400  |
| H | -1.38919500 | 1.97427500  | -1.50751500 | H | -0.37828400 | 1.51046600  | 2.16901200  |
| C | -2.41126300 | 5.16181400  | -0.90538500 | C | 0.83159800  | 3.46348700  | 3.79116800  |
| H | -4.19331200 | 5.70333500  | 0.18474800  | H | 2.42901700  | 2.11826300  | 3.21959200  |
| H | -0.71275200 | 4.30332600  | -1.92077000 | H | 1.14433500  | 1.33830800  | 4.14056900  |
| H | -2.10881600 | 6.18928800  | -1.08871200 | C | 0.42151700  | 4.06256600  | 1.37328700  |
| H | -4.43441000 | 1.11956900  | 0.58799100  | H | 2.01633000  | 2.75169700  | 0.75538800  |
| C | -1.37922600 | -2.19697700 | 4.03797600  | H | 0.47344800  | 2.35275900  | 0.01516900  |
| H | -0.61184600 | -2.94314000 | 4.26478500  | C | 1.05922300  | 4.51006700  | 2.69344800  |
| N | 1.22577100  | 0.33867700  | 1.61382400  | H | 1.32529900  | 3.76593800  | 4.72300800  |
| N | 1.05120100  | -1.74126200 | 0.65876600  | H | -0.24402300 | 3.39906600  | 4.01032200  |
| N | -0.64200300 | -0.93041200 | 2.15517700  | H | 0.62804500  | 4.79142200  | 0.58170600  |
| C | 0.54464000  | -0.81660000 | 1.45934800  | H | -0.66997000 | 4.02466100  | 1.48737100  |
| C | -1.79544100 | -1.68013300 | 1.64767500  | H | 0.65365000  | 5.48094900  | 3.00518600  |
| H | -1.51985900 | -2.20214400 | 0.73210700  | H | 2.13966000  | 4.64943600  | 2.54191400  |
| O | -4.03871200 | -0.74164900 | 1.84674200  | C | -2.23273500 | -1.85202900 | 5.26482700  |
| C | -2.94563100 | -0.70626000 | 1.27291900  | H | -3.01067800 | -2.59762500 | 5.46230500  |
| N | -2.66212200 | 0.16946100  | 0.27942200  | H | -1.59195100 | -1.80056400 | 6.15506600  |
| H | -1.81735900 | 0.05590000  | -0.28209200 | C | -1.64941100 | 0.26399600  | 4.20450900  |
| C | -0.72457500 | -0.84832600 | 3.62220500  | H | -1.07206100 | 0.88118200  | 4.90065000  |
| H | 0.29003600  | -0.74208200 | 4.00761600  | H | -2.01918900 | 0.92662600  | 3.41826000  |
| C | -2.19102900 | -2.63891800 | 2.78939900  | C | -2.79964400 | -0.45957500 | 4.93730200  |
| H | -1.95626100 | -3.67069600 | 2.51685500  | H | -3.13375400 | 0.07990400  | 5.82948900  |
| H | -3.26620300 | -2.57264200 | 2.96196900  | H | -3.65687200 | -0.55697500 | 4.26556800  |
| H | 2.14506900  | 0.34752000  | 1.18731000  | H | 1.40093100  | -1.37520200 | -0.54963400 |
| C | 0.85408300  | -3.17408800 | 0.88575000  | C | 5.72561200  | -0.04503500 | -1.82730600 |
| C | 0.29443800  | -3.88493000 | -0.35416900 | C | 6.81202300  | -0.88710500 | -1.59256500 |

|              |             |             |             |   |             |             |             |
|--------------|-------------|-------------|-------------|---|-------------|-------------|-------------|
| C            | 6.73027000  | -1.88179400 | -0.61479500 | C | 1.39915500  | 3.33116500  | -1.02369800 |
| C            | 5.55419000  | -2.02789300 | 0.12346800  | C | 3.47214400  | 4.50903700  | -1.37360900 |
| C            | 4.46451700  | -1.19179200 | -0.12037100 | C | 0.69838000  | 4.53386500  | -1.10954200 |
| C            | 4.53187600  | -0.19549800 | -1.10554000 | H | 0.85906600  | 2.40873100  | -0.84261500 |
| C            | 3.37377600  | 0.72348300  | -1.34436700 | C | 2.77298200  | 5.71477000  | -1.46695000 |
| C            | 3.64434900  | 2.18516500  | -1.21157600 | H | 4.55584600  | 4.50122600  | -1.46168900 |
| C            | 2.81528300  | 3.11249200  | -1.86742800 | C | 1.38352900  | 5.73023600  | -1.33560800 |
| C            | 2.98986000  | 4.48095800  | -1.68482500 | H | -0.38287900 | 4.53340900  | -1.00033600 |
| C            | 4.00000700  | 4.95702600  | -0.84210900 | H | 3.31604500  | 6.64162600  | -1.63088900 |
| C            | 4.84056500  | 4.04771100  | -0.19792300 | H | 0.83899600  | 6.66810000  | -1.40155400 |
| C            | 4.67072600  | 2.67521800  | -0.38759000 | C | 3.63351100  | 1.21741600  | -2.37464300 |
| N            | 2.15052500  | 0.39635100  | -1.59886600 | C | 3.58458300  | 1.88727300  | -3.60288200 |
| H            | 5.79525700  | 0.73272400  | -2.58257600 | C | 3.79895600  | -0.17294500 | -2.37723700 |
| H            | 7.72379500  | -0.76542700 | -2.17125300 | C | 3.68688900  | 1.18469200  | -4.80451400 |
| H            | 5.48296800  | -2.79403400 | 0.89107600  | H | 3.45462500  | 2.96403900  | -3.62388100 |
| H            | 3.54785000  | -1.32233700 | 0.44524200  | C | 3.89718300  | -0.87767900 | -3.57659400 |
| H            | 2.02212600  | 2.73336200  | -2.50272400 | H | 3.83713100  | -0.70992900 | -1.43517400 |
| H            | 2.33884000  | 5.18146700  | -2.20173100 | C | 3.83947100  | -0.20228100 | -4.79707900 |
| H            | 5.62967200  | 4.40537600  | 0.45835700  | H | 3.64091900  | 1.72451900  | -5.74658200 |
| H            | 5.32452800  | 1.97874100  | 0.12773100  | H | 4.01500400  | -1.95702800 | -3.55580800 |
| H            | 4.13418600  | 6.02538500  | -0.69654800 | H | 3.91282800  | -0.75154300 | -5.73171700 |
| H            | 7.57848100  | -2.53439000 | -0.42704800 | H | 4.58740200  | 2.24157100  | -0.75913700 |
| C            | 0.21712600  | -0.79867300 | -2.23343900 | C | 3.09160600  | -0.31320400 | 4.26888400  |
| O            | -0.20830800 | -1.77746200 | -3.06784400 | H | 2.41011500  | -0.62127000 | 5.06646200  |
| O            | -0.57086500 | 0.02961200  | -1.76796800 | N | 0.87515400  | -2.19434800 | 1.09567600  |
| C            | -1.60689700 | -1.75740400 | -3.47526800 | N | -0.31291000 | -0.27649600 | 1.48327200  |
| H            | -1.92784400 | -0.71491000 | -3.49127800 | N | 1.97624200  | -0.43118700 | 2.15479100  |
| C            | 1.64175100  | -0.89329100 | -1.85536700 | C | 0.82822900  | -0.93126800 | 1.59309400  |
| C            | -1.63988700 | -2.34536800 | -4.87622500 | C | 2.25061800  | 0.99323700  | 2.34165800  |
| H            | -2.66519600 | -2.32983800 | -5.26161500 | H | 1.35230200  | 1.57890200  | 2.16767900  |
| H            | -1.00627600 | -1.76607200 | -5.55589400 | O | 4.11871600  | 2.35603600  | 1.61337600  |
| H            | -1.28813400 | -3.38360100 | -4.87425200 | C | 3.24654400  | 1.54620900  | 1.30254000  |
| C            | -2.46077700 | -2.53384200 | -2.48443700 | N | 3.02313000  | 1.16293300  | 0.01567000  |
| H            | -2.39824700 | -2.09328800 | -1.48671400 | H | 2.19503000  | 0.61533500  | -0.20831500 |
| H            | -3.50904200 | -2.50434300 | -2.79665600 | C | 2.90008500  | -1.20115500 | 3.00442600  |
| H            | -2.14292600 | -3.58129200 | -2.43397700 | H | 2.42754400  | -2.15487100 | 3.23368100  |
| C            | 2.50191300  | -1.90504900 | -2.61042200 | C | 2.73873000  | 1.12145100  | 3.79459900  |
| H            | 3.07754600  | -1.41259000 | -3.40676300 | H | 1.94598300  | 1.54894200  | 4.41383200  |
| H            | 3.22148800  | -2.41176700 | -1.96247000 | H | 3.59525500  | 1.79691000  | 3.83604700  |
| H            | 1.87420900  | -2.66584700 | -3.07647000 | H | -0.03669800 | -2.54632800 | 0.82122600  |
|              |             |             |             | C | -0.85000000 | 0.69060400  | 2.43905500  |
|              |             |             |             | C | -1.11303200 | 2.05250200  | 1.77083200  |
|              |             |             |             | C | -2.16344600 | 0.12334700  | 3.01037900  |
|              |             |             |             | H | -0.15702600 | 0.81780600  | 3.28149100  |
| <b>TS3-S</b> |             |             |             |   |             |             |             |
| C            | 3.56511100  | 1.99316500  | -1.06152400 |   |             |             |             |
| C            | 2.79321900  | 3.30696900  | -1.15832400 |   |             |             |             |

|   |             |             |             |                 |             |             |             |
|---|-------------|-------------|-------------|-----------------|-------------|-------------|-------------|
| C | -1.80470900 | 3.03867400  | 2.71961500  | C               | -4.66142300 | -0.99709800 | -0.43417400 |
| H | -1.74684500 | 1.87665200  | 0.89503900  | C               | -3.94788900 | 0.31525200  | -0.56185100 |
| H | -0.17806600 | 2.48478700  | 1.39488100  | C               | -4.76045800 | 1.55535800  | -0.39451800 |
| C | -2.84855100 | 1.10654500  | 3.96701900  | C               | -4.14695700 | 2.82127100  | -0.47972400 |
| H | -2.83322800 | -0.09671000 | 2.16991900  | C               | -4.87958200 | 3.98850600  | -0.29822300 |
| H | -1.95330200 | -0.82963600 | 3.51204200  | C               | -6.25174700 | 3.92883700  | -0.02858600 |
| C | -3.10517400 | 2.45540900  | 3.28464500  | C               | -6.87706800 | 2.68461100  | 0.04070700  |
| H | -2.00828400 | 3.97644100  | 2.18802500  | C               | -6.14258500 | 1.51132900  | -0.14361400 |
| H | -1.12588300 | 3.28832200  | 3.54900700  | N               | -2.69396300 | 0.47445100  | -0.81521900 |
| H | -3.78967100 | 0.67549400  | 4.33169600  | H               | -5.01152700 | -0.81658700 | 1.68336500  |
| H | -2.21071800 | 1.26102000  | 4.85011300  | H               | -6.13046500 | -3.01843700 | 1.88859200  |
| H | -3.56277500 | 3.15929400  | 3.99122300  | H               | -5.61867300 | -3.65964800 | -2.33527900 |
| H | -3.82176500 | 2.31619700  | 2.46416900  | H               | -4.49528600 | -1.45996900 | -2.52751600 |
| C | 2.00508000  | -2.89618800 | 0.47511000  | H               | -3.08635900 | 2.86280600  | -0.69847200 |
| C | 2.29613800  | -4.21091900 | 1.21525900  | H               | -4.37990900 | 4.95170500  | -0.36624300 |
| C | 1.71614200  | -3.17142900 | -1.00776700 | H               | -7.94400600 | 2.62090100  | 0.23870600  |
| H | 2.87305100  | -2.23893900 | 0.54116200  | H               | -6.65021300 | 0.55465300  | -0.09132400 |
| C | 3.44152300  | -4.99126600 | 0.55753200  | H               | -6.82298200 | 4.84121400  | 0.11963600  |
| H | 1.38018600  | -4.81925600 | 1.20378700  | H               | -6.42980500 | -4.45382000 | -0.12124500 |
| H | 2.52615700  | -4.00952100 | 2.26693900  | C               | -0.52183700 | 0.10141800  | -1.73065800 |
| C | 2.86758200  | -3.94301100 | -1.66401700 | O               | -0.93377800 | 0.84553100  | -2.77791700 |
| H | 0.79488200  | -3.76447400 | -1.08056200 | O               | 0.67245800  | -0.10807000 | -1.52431100 |
| H | 1.52999700  | -2.22580600 | -1.52069200 | C               | 0.09646000  | 1.31512500  | -3.66819400 |
| C | 3.16158500  | -5.25404300 | -0.92679700 | H               | 0.72542100  | 2.05906700  | -3.17892000 |
| H | 3.60381500  | -5.93503000 | 1.09258100  | H               | -0.43371000 | 1.76753100  | -4.50800900 |
| H | 4.37225100  | -4.41259200 | 0.65171000  | H               | 0.71649400  | 0.48357000  | -4.00965800 |
| H | 2.62653000  | -4.13755500 | -2.71627500 | C               | -1.58605000 | -2.56379000 | -2.27919600 |
| H | 3.77252000  | -3.31835200 | -1.65951400 | C               | -1.80229700 | -1.92860100 | -1.04713600 |
| H | 4.01209600  | -5.77143500 | -1.38804000 | C               | -2.16483500 | -2.72860100 | 0.05088600  |
| H | 2.29399600  | -5.92331900 | -1.01900400 | C               | -2.31823500 | -4.10783600 | -0.08068600 |
| C | 4.56326500  | -0.49818500 | 4.66116600  | C               | -2.09887800 | -4.72411800 | -1.31560900 |
| H | 4.93167200  | 0.30819200  | 5.30426500  | C               | -1.73116000 | -3.94520000 | -2.41437900 |
| H | 4.68577300  | -1.44202000 | 5.20884800  | H               | -1.31278800 | -1.96710500 | -3.14577300 |
| C | 4.33553400  | -1.41066900 | 2.42730700  | H               | -2.34578300 | -2.25684100 | 1.01077900  |
| H | 4.59190100  | -2.47378300 | 2.48900600  | H               | -2.61324800 | -4.70083500 | 0.78079600  |
| H | 4.39150700  | -1.12277700 | 1.37487000  | H               | -2.21710700 | -5.79914100 | -1.42012600 |
| C | 5.28748200  | -0.57679300 | 3.30856700  | H               | -1.56088100 | -4.41299200 | -3.38070800 |
| H | 6.28573300  | -1.01970700 | 3.38334400  | C               | -1.62900300 | -0.43718300 | -0.88356500 |
| H | 5.40469900  | 0.42831500  | 2.88969400  | H               | -0.98408500 | -0.36368300 | 0.37598700  |
| C | -5.14264000 | -1.44185800 | 0.80457800  |                 |             |             |             |
| C | -5.77345900 | -2.68124500 | 0.91897300  |                 |             |             |             |
| C | -5.94261300 | -3.48649500 | -0.20906400 |                 |             |             |             |
| C | -5.48859400 | -3.04009400 | -1.45231000 |                 |             |             |             |
| C | -4.85808600 | -1.80208400 | -1.56356900 |                 |             |             |             |
|   |             |             |             | <b>TS3-S-1b</b> |             |             |             |
|   |             |             |             | C               | 3.56930700  | 2.04466300  | -0.78656200 |
|   |             |             |             | C               | 2.80671400  | 3.36686600  | -0.75605500 |
|   |             |             |             | C               | 1.41638600  | 3.39196200  | -0.59088600 |

|   |             |             |             |   |             |             |             |
|---|-------------|-------------|-------------|---|-------------|-------------|-------------|
| C | 3.49050600  | 4.57708500  | -0.90159200 | H | -1.73284000 | 1.71218400  | 1.12770700  |
| C | 0.72193300  | 4.60155700  | -0.58601100 | H | -0.15066400 | 2.25675500  | 1.65754600  |
| H | 0.87287500  | 2.46389000  | -0.45708900 | C | -2.82325100 | 0.70508300  | 4.13018900  |
| C | 2.79864600  | 5.79044600  | -0.90145100 | H | -2.83071400 | -0.33652200 | 2.23457000  |
| H | 4.57217300  | 4.56829700  | -1.01211600 | H | -1.96199600 | -1.19740900 | 3.50679800  |
| C | 1.41139800  | 5.80583300  | -0.74630800 | C | -3.05855100 | 2.11392100  | 3.57236200  |
| H | -0.35696200 | 4.59945000  | -0.45488900 | H | -1.94590500 | 3.70322300  | 2.59561900  |
| H | 3.34538900  | 6.72287000  | -1.01321300 | H | -1.06186400 | 2.88699000  | 3.88297800  |
| H | 0.87274100  | 6.74933900  | -0.74142600 | H | -3.77110700 | 0.25956700  | 4.45812800  |
| C | 3.64106600  | 1.40467100  | -2.17193400 | H | -2.18162500 | 0.76854700  | 5.02160100  |
| C | 3.53993800  | 2.18405600  | -3.33036800 | H | -3.49229300 | 2.76102600  | 4.34524900  |
| C | 3.85775400  | 0.02789700  | -2.30891600 | H | -3.78832300 | 2.06361500  | 2.75355600  |
| C | 3.63815400  | 1.60134200  | -4.59499900 | C | 2.00705800  | -2.98646500 | 0.24417000  |
| H | 3.37012900  | 3.25218000  | -3.24793100 | C | 2.36922700  | -4.35217500 | 0.84897300  |
| C | 3.95354000  | -0.55652200 | -3.57118400 | C | 1.66611200  | -3.13803600 | -1.24570200 |
| H | 3.93812100  | -0.59236500 | -1.42198200 | H | 2.85783000  | -2.30904100 | 0.33674000  |
| C | 3.84127900  | 0.22707000  | -4.72123800 | C | 3.51641500  | -5.02163500 | 0.08177800  |
| H | 3.54905600  | 2.22481000  | -5.48060500 | H | 1.47607500  | -4.99222700 | 0.80918000  |
| H | 4.11079000  | -1.62767600 | -3.65536900 | H | 2.63066200  | -4.24188400 | 1.90657600  |
| H | 3.91064300  | -0.23023000 | -5.70437400 | C | 2.81263000  | -3.80739200 | -2.01291300 |
| H | 4.59129200  | 2.25425500  | -0.45489700 | H | 0.76084900  | -3.75307300 | -1.33673600 |
| C | 3.09475500  | -0.79320500 | 4.29063000  | H | 1.43270900  | -2.15696300 | -1.66375800 |
| H | 2.41228400  | -1.17783800 | 5.05344500  | C | 3.18405900  | -5.16572000 | -1.40780600 |
| N | 0.88256900  | -2.37575500 | 0.96495500  | H | 3.73890900  | -6.00025700 | 0.52439100  |
| N | -0.30834600 | -0.50234600 | 1.53324300  | H | 4.42609200  | -4.41290000 | 0.19088000  |
| N | 1.98831600  | -0.71384800 | 2.16870100  | H | 2.53322600  | -3.91714600 | -3.06807300 |
| C | 0.83439700  | -1.16300900 | 1.57662800  | H | 3.69505200  | -3.15217500 | -1.98833200 |
| C | 2.25562300  | 0.68732100  | 2.49256200  | H | 4.03203300  | -5.60741100 | -1.94628200 |
| H | 1.35483100  | 1.28129100  | 2.37178100  | H | 2.33756300  | -5.85796800 | -1.52363700 |
| O | 4.13276600  | 2.10662900  | 1.90977700  | C | 4.56633700  | -1.00867700 | 4.66841800  |
| C | 3.25135300  | 1.34403600  | 1.51593000  | H | 4.93063800  | -0.26337600 | 5.38356400  |
| N | 3.01733200  | 1.11024000  | 0.19592700  | H | 4.69086600  | -1.99792700 | 5.12870300  |
| H | 2.19078000  | 0.58736800  | -0.08679600 | C | 4.34732900  | -1.71246500 | 2.35933200  |
| C | 2.90991600  | -1.55871100 | 2.94742400  | H | 4.60392200  | -2.77692400 | 2.32637500  |
| H | 2.43817100  | -2.53047300 | 3.08209300  | H | 4.40802400  | -1.33207700 | 1.33694200  |
| C | 2.73657600  | 0.67838900  | 3.95299800  | C | 5.29413600  | -0.96056400 | 3.31636500  |
| H | 1.93791400  | 1.04017400  | 4.60587100  | H | 6.29401800  | -1.40464800 | 3.35283300  |
| H | 3.58839700  | 1.35195200  | 4.06333300  | H | 5.40737100  | 0.07944300  | 2.99252900  |
| H | -0.03094200 | -2.70762400 | 0.67253000  | C | -5.07971200 | -1.62707200 | 0.79139000  |
| C | -0.83660500 | 0.39288700  | 2.56315800  | C | -5.70047500 | -2.87681700 | 0.79552200  |
| C | -1.08724000 | 1.80711700  | 2.00724900  | C | -5.90759100 | -3.55802800 | -0.40533900 |
| C | -2.15654300 | -0.20185500 | 3.08874500  | C | -5.49837900 | -2.97893900 | -1.60887600 |
| H | -0.14336000 | 0.44827800  | 3.41291500  | C | -4.87723400 | -1.73102700 | -1.61001800 |
| C | -1.75342600 | 2.72046900  | 3.04348000  | C | -4.64526400 | -1.04842400 | -0.40871500 |

|                 |             |             |             |   |             |             |             |
|-----------------|-------------|-------------|-------------|---|-------------|-------------|-------------|
| C               | -3.94556400 | 0.27825900  | -0.41596400 | C | 2.80003800  | 3.37142200  | -0.53338900 |
| C               | -4.76521800 | 1.48941500  | -0.11722000 | C | 1.40599200  | 3.39261400  | -0.40634900 |
| C               | -4.17213500 | 2.76794600  | -0.14442000 | C | 3.49277500  | 4.58459900  | -0.57338100 |
| C               | -4.90833200 | 3.90775700  | 0.15688400  | C | 0.71843700  | 4.60321400  | -0.32259900 |
| C               | -6.26329900 | 3.80784100  | 0.49356100  | H | 0.85450900  | 2.46085400  | -0.36186200 |
| C               | -6.86852500 | 2.55203100  | 0.50883100  | C | 2.80689500  | 5.79930000  | -0.50188900 |
| C               | -6.13090400 | 1.40613800  | 0.20332000  | H | 4.57705300  | 4.57714800  | -0.65424000 |
| N               | -2.69665400 | 0.47676000  | -0.66153100 | C | 1.41699700  | 5.81196300  | -0.37466700 |
| H               | -4.92222500 | -1.09641600 | 1.72611800  | H | -0.36266200 | 4.59866800  | -0.21237500 |
| H               | -6.02237300 | -3.31722900 | 1.73562000  | H | 3.36056400  | 6.73383200  | -0.53149200 |
| H               | -5.65648800 | -3.50325800 | -2.54731000 | H | 0.88274700  | 6.75565800  | -0.30836800 |
| H               | -4.54888600 | -1.28738700 | -2.54449600 | C | 3.66811100  | 1.47059900  | -2.01749800 |
| H               | -3.12564200 | 2.84186000  | -0.41653200 | C | 3.63931800  | 2.30838800  | -3.13891000 |
| H               | -4.42511800 | 4.88130500  | 0.12956300  | C | 3.87047400  | 0.09886600  | -2.21166400 |
| H               | -7.92218700 | 2.45760800  | 0.75893300  | C | 3.81295000  | 1.78879700  | -4.42265300 |
| H               | -6.62372500 | 0.44044900  | 0.21640800  | H | 3.47656400  | 3.37339700  | -3.01139600 |
| H               | -6.83732600 | 4.69864800  | 0.73371600  | C | 4.03775000  | -0.42296800 | -3.49411100 |
| H               | -6.38774800 | -4.53282200 | -0.40439200 | H | 3.89145100  | -0.56512500 | -1.35374500 |
| C               | -0.51844000 | 0.24890600  | -1.60968000 | C | 4.01077400  | 0.42012900  | -4.60641900 |
| O               | -0.93074500 | 1.17872800  | -2.49411400 | H | 3.78689500  | 2.45737800  | -5.27896200 |
| O               | 0.67406600  | -0.02602800 | -1.47359300 | H | 4.18628400  | -1.49092100 | -3.62308000 |
| C               | 0.08817500  | 1.76409000  | -3.34061700 | H | 4.13880400  | 0.01338600  | -5.60568900 |
| H               | 0.91137700  | 2.12087600  | -2.72559700 | H | 4.57682200  | 2.24669600  | -0.25213200 |
| H               | 0.47994800  | 0.98182200  | -3.99918600 | C | 3.07396300  | -1.01426800 | 4.33846300  |
| C               | -1.59150100 | -2.31095600 | -2.51371700 | H | 2.38105600  | -1.42408800 | 5.07840700  |
| C               | -1.78275100 | -1.86063900 | -1.19925300 | N | 0.85744800  | -2.42835700 | 0.94482900  |
| C               | -2.12345500 | -2.81017500 | -0.22125200 | N | -0.31881400 | -0.56630200 | 1.57203500  |
| C               | -2.27788400 | -4.15725800 | -0.54695600 | N | 1.96765100  | -0.82778800 | 2.22615000  |
| C               | -2.08230300 | -4.58890700 | -1.86144200 | C | 0.81677700  | -1.24052800 | 1.60344200  |
| C               | -1.73713700 | -3.65869100 | -2.84381000 | C | 2.24787400  | 0.55559600  | 2.61034800  |
| H               | -1.33764300 | -1.59428100 | -3.29047500 | H | 1.35143300  | 1.16203100  | 2.52466600  |
| H               | -2.29146300 | -2.48222000 | 0.79945900  | O | 4.13657100  | 1.97915700  | 2.08081200  |
| H               | -2.55780300 | -4.86839300 | 0.22555000  | C | 3.24284400  | 1.24715700  | 1.65748400  |
| H               | -2.20202600 | -5.63806700 | -2.11756600 | N | 2.99763700  | 1.07904800  | 0.32887100  |
| H               | -1.58645000 | -3.98070700 | -3.87105000 | H | 2.16168300  | 0.58337500  | 0.02528700  |
| C               | -1.61930300 | -0.40249300 | -0.83933500 | C | 2.88696500  | -1.71304200 | 2.96077900  |
| H               | -0.97684400 | -0.47641900 | 0.42128200  | H | 2.41417600  | -2.68978600 | 3.04957400  |
| C               | -0.55677600 | 2.89233000  | -4.11489600 | C | 2.73844400  | 0.47616600  | 4.06641500  |
| H               | -0.92622900 | 3.66775900  | -3.43517800 | H | 1.95075600  | 0.82329800  | 4.74012700  |
| H               | 0.18320400  | 3.34574400  | -4.78409400 | H | 3.60281300  | 1.12951100  | 4.19872000  |
| H               | -1.39592400 | 2.53259400  | -4.72014100 | H | -0.05625100 | -2.73816200 | 0.62996400  |
|                 |             |             |             | C | -0.85072700 | 0.29959300  | 2.62439600  |
|                 |             |             |             | C | -1.07527600 | 1.73519900  | 2.11410200  |
|                 |             |             |             | C | -2.18524500 | -0.29473800 | 3.11242200  |
| <b>TS3-S-1c</b> |             |             |             |   |             |             |             |
| C               | 3.56111700  | 2.05041000  | -0.60996600 |   |             |             |             |



|   |             |             |             |   |             |             |             |
|---|-------------|-------------|-------------|---|-------------|-------------|-------------|
| H | -0.16993500 | 0.31665200  | 3.48592500  | C | -4.88037100 | -1.69106200 | -1.62929600 |
| C | -1.74033900 | 2.62218000  | 3.17362300  | C | -4.65901800 | -1.05925800 | -0.39864800 |
| H | -1.71351400 | 1.67967300  | 1.22552400  | C | -3.96363200 | 0.26866900  | -0.34682600 |
| H | -0.12867500 | 2.18206800  | 1.78895300  | C | -4.78917000 | 1.46526900  | -0.00719200 |
| C | -2.85156600 | 0.58569700  | 4.17666600  | C | -4.20333700 | 2.74740700  | -0.00162800 |
| H | -2.85065700 | -0.39132600 | 2.24617400  | C | -4.94465300 | 3.87431100  | 0.33371400  |
| H | -2.00924800 | -1.30650000 | 3.49867400  | C | -6.29730900 | 3.75712200  | 0.67419300  |
| C | -3.06021000 | 2.01652600  | 3.66616600  | C | -6.89493400 | 2.49762400  | 0.65946600  |
| H | -1.91322800 | 3.62269300  | 2.75802000  | C | -6.15238600 | 1.36490100  | 0.31848500  |
| H | -1.05660600 | 2.74967000  | 4.02640800  | N | -2.71499500 | 0.48169300  | -0.58009800 |
| H | -3.80963900 | 0.14318000  | 4.47783300  | H | -4.94523100 | -1.20125700 | 1.73089300  |
| H | -2.21995300 | 0.60838200  | 5.07725100  | H | -6.03086500 | -3.42725200 | 1.63870600  |
| H | -3.49429800 | 2.64249400  | 4.45609600  | H | -5.64005800 | -3.42772400 | -2.64590500 |
| H | -3.78068100 | 2.00476400  | 2.83769900  | H | -4.55010400 | -1.20453900 | -2.54156200 |
| C | 1.98345100  | -3.03574400 | 0.22594700  | H | -3.15823000 | 2.83423000  | -0.27519400 |
| C | 2.25154600  | -4.45683300 | 0.74436500  | H | -4.46739700 | 4.85116600  | 0.33002200  |
| C | 1.71117300  | -3.06022100 | -1.28487600 | H | -7.94652900 | 2.39018300  | 0.91295900  |
| H | 2.85907400  | -2.41211500 | 0.40721200  | H | -6.63941600 | 0.39629300  | 0.30790100  |
| C | 3.40241000  | -5.12724700 | -0.01698200 | H | -6.87550100 | 4.63770300  | 0.94060600  |
| H | 1.33185600  | -5.04608800 | 0.61711600  | H | -6.37505800 | -4.55337500 | -0.55294300 |
| H | 2.46493100  | -4.43282300 | 1.81884600  | C | -0.53998000 | 0.31064400  | -1.54416700 |
| C | 2.86820400  | -3.72118300 | -2.04396600 | O | -0.97218500 | 1.27068300  | -2.38521300 |
| H | 0.78859100  | -3.62699000 | -1.46604900 | O | 0.65547900  | 0.04220900  | -1.41799100 |
| H | 1.53542900  | -2.04195500 | -1.63734200 | C | 0.01013900  | 1.91351700  | -3.25170800 |
| C | 3.14472900  | -5.13817000 | -1.52847200 | H | 0.93813500  | 2.02193300  | -2.69152600 |
| H | 3.55081200  | -6.14805000 | 0.35599300  | C | -1.57661500 | -2.24379900 | -2.52444400 |
| H | 4.33472800  | -4.57990100 | 0.18557000  | C | -1.78450900 | -1.82826500 | -1.20114000 |
| H | 2.64101900  | -3.73923100 | -3.11700100 | C | -2.13262200 | -2.80484600 | -0.25226200 |
| H | 3.77621900  | -3.11225600 | -1.92467700 | C | -2.27510600 | -4.14384900 | -0.61355900 |
| H | 3.99959500  | -5.57929500 | -2.05634600 | C | -2.06110100 | -4.54108700 | -1.93607600 |
| H | 2.27491000  | -5.77579400 | -1.74259100 | C | -1.71043400 | -3.58391800 | -2.89008500 |
| C | 4.53977400  | -1.26884300 | 4.71225400  | H | -1.31798400 | -1.50753800 | -3.28048500 |
| H | 4.91024500  | -0.56869700 | 5.46868700  | H | -2.31417500 | -2.50380300 | 0.77422600  |
| H | 4.64801300  | -2.28325900 | 5.11844900  | H | -2.56030900 | -4.87576300 | 0.13733500  |
| C | 4.32474900  | -1.84099000 | 2.36529200  | H | -2.17121400 | -5.58415700 | -2.21976100 |
| H | 4.57386800  | -2.90277100 | 2.26287400  | H | -1.54551100 | -3.87908300 | -3.92325900 |
| H | 4.38922200  | -1.39433600 | 1.37010900  | C | -1.63141600 | -0.38161700 | -0.79494600 |
| C | 5.27629500  | -1.15786500 | 3.36850500  | H | -0.98403300 | -0.49873400 | 0.45760800  |
| H | 6.26899000  | -1.61882100 | 3.38617200  | C | 0.24654000  | 1.02346400  | -4.46432800 |
| H | 5.40764700  | -0.10378500 | 3.10177500  | H | 0.95258700  | 1.50217700  | -5.14994700 |
| C | -5.09610700 | -1.69134100 | 0.77319500  | H | 0.67144300  | 0.06314500  | -4.15999100 |
| C | -5.70771900 | -2.94442600 | 0.72013000  | H | -0.69343400 | 0.84895000  | -5.00098900 |
| C | -5.90273000 | -3.57572900 | -0.50975900 | C | -0.56515400 | 3.27339500  | -3.60270500 |
| C | -5.49187600 | -2.94245400 | -1.68514200 | H | -0.74708900 | 3.86365600  | -2.69985500 |

|                 |             |             |             |   |             |             |             |
|-----------------|-------------|-------------|-------------|---|-------------|-------------|-------------|
| H               | 0.14155400  | 3.82360200  | -4.23368700 | H | -2.88672400 | 0.18864000  | -4.29490200 |
| H               | -1.51017600 | 3.17031400  | -4.14818000 | H | 0.66684000  | -2.56450300 | 0.24706000  |
| <b>TS3-S-1d</b> |             |             |             | C | 1.44658100  | 0.09269200  | -2.27363000 |
| C               | -3.74168200 | 1.58096700  | 0.30621100  | C | 1.55065700  | 1.61444400  | -2.07436500 |
| C               | -3.50069000 | 3.07275600  | 0.55093600  | C | 2.84279100  | -0.47632000 | -2.59120600 |
| C               | -2.84673400 | 3.84745800  | -0.41546500 | H | 0.81083200  | -0.11517000 | -3.14401000 |
| C               | -3.99106200 | 3.70968600  | 1.69691000  | C | 2.14475500  | 2.29971000  | -3.30999300 |
| C               | -2.67653500 | 5.22036800  | -0.23777000 | H | 2.19470200  | 1.80606000  | -1.21112400 |
| H               | -2.46311100 | 3.37066500  | -1.31169800 | H | 0.56968800  | 2.04044400  | -1.83237800 |
| C               | -3.82107800 | 5.08351300  | 1.87792600  | C | 3.45881300  | 0.20201000  | -3.82192900 |
| H               | -4.50548000 | 3.13104200  | 2.45666500  | H | 3.49035500  | -0.31707200 | -1.72028200 |
| C               | -3.16194900 | 5.84539300  | 0.91278200  | H | 2.76757400  | -1.55962200 | -2.74745700 |
| H               | -2.16198800 | 5.80106600  | -0.99896100 | C | 3.52582000  | 1.72426000  | -3.64731100 |
| H               | -4.20487400 | 5.55632800  | 2.77798000  | H | 2.21351200  | 3.38114100  | -3.13767900 |
| H               | -3.02773600 | 6.91423800  | 1.05477700  | H | 1.47091100  | 2.16016900  | -4.16858200 |
| C               | -3.96948200 | 0.77013500  | 1.57223800  | H | 4.46028800  | -0.20530900 | -4.00696700 |
| C               | -3.00581900 | 0.72569500  | 2.58955700  | H | 2.85303000  | -0.03484700 | -4.70930800 |
| C               | -5.16421000 | 0.06327600  | 1.73816700  | H | 3.92583300  | 2.19467900  | -4.55446400 |
| C               | -3.24001800 | -0.01191100 | 3.74958100  | H | 4.22203200  | 1.96107900  | -2.83043700 |
| H               | -2.07438700 | 1.26721300  | 2.46312000  | C | -1.39533900 | -3.03984500 | 0.33046000  |
| C               | -5.40143300 | -0.67350100 | 2.90154800  | C | -1.37904100 | -4.54474700 | 0.02321100  |
| H               | -5.91648500 | 0.09382000  | 0.95367500  | C | -1.48786600 | -2.79033400 | 1.84199400  |
| C               | -4.43988500 | -0.71080800 | 3.91167200  | H | -2.26311500 | -2.57914400 | -0.14276000 |
| H               | -2.48360000 | -0.03986000 | 4.52955400  | C | -2.59073700 | -5.25854500 | 0.63524700  |
| H               | -6.33719400 | -1.21380600 | 3.01731500  | H | -0.45348000 | -4.97254400 | 0.43559200  |
| H               | -4.62202700 | -1.28150400 | 4.81820900  | H | -1.34473200 | -4.70143300 | -1.06056600 |
| H               | -4.63943100 | 1.48934600  | -0.31212700 | C | -2.69818600 | -3.50850100 | 2.45123500  |
| C               | -1.78757600 | -1.71873900 | -4.23635200 | H | -0.56453000 | -3.14886400 | 2.31969300  |
| H               | -0.85314100 | -1.95410000 | -4.75453000 | H | -1.55465500 | -1.71503000 | 2.02677000  |
| N               | -0.21039800 | -2.38788300 | -0.23094000 | C | -2.67972600 | -5.00984300 | 2.14579500  |
| N               | 0.89984100  | -0.58364100 | -1.09533800 | H | -2.53576900 | -6.33336500 | 0.42298900  |
| N               | -1.23209300 | -1.22570100 | -1.97442900 | H | -3.50736600 | -4.88817600 | 0.15398900  |
| C               | -0.16085200 | -1.36992500 | -1.12442200 | H | -2.72125900 | -3.33510800 | 3.53330400  |
| C               | -1.65056100 | 0.07208500  | -2.52263300 | H | -3.61736300 | -3.06391900 | 2.04698500  |
| H               | -0.87551800 | 0.81367300  | -2.35181600 | H | -3.57404200 | -5.49338800 | 2.55821300  |
| O               | -4.02715400 | 0.58824800  | -2.30061100 | H | -1.81235000 | -5.47151100 | 2.64014900  |
| C               | -2.91036400 | 0.57426900  | -1.77679400 | C | -3.00694500 | -2.35348200 | -4.91566900 |
| N               | -2.67610300 | 1.00284000  | -0.51400200 | H | -3.34157900 | -1.79140100 | -5.79435200 |
| H               | -1.72923200 | 1.04782900  | -0.13484000 | H | -2.75521200 | -3.36859500 | -5.24999400 |
| C               | -1.78186100 | -2.31191100 | -2.80158400 | C | -3.25655000 | -2.73686300 | -2.51933400 |
| H               | -1.11545300 | -3.17006700 | -2.70999800 | H | -3.28485400 | -3.81027100 | -2.30470800 |
| C               | -1.89836300 | -0.18471600 | -4.02173700 | H | -3.66267500 | -2.22098800 | -1.64624500 |
| H               | -1.15729400 | 0.34723900  | -4.62368400 | C | -4.06045300 | -2.40708100 | -3.79563200 |
|                 |             |             |             | H | -4.85104300 | -3.13782100 | -3.99451800 |

|   |             |             |             |              |             |             |             |
|---|-------------|-------------|-------------|--------------|-------------|-------------|-------------|
| H | -4.53182200 | -1.42704800 | -3.68147300 | <b>DP-TS</b> |             |             |             |
| C | 3.25075200  | -2.56485900 | 0.61536100  | C            | -3.85477000 | 2.04753900  | -0.74528500 |
| C | 2.96430800  | -3.88302100 | 0.97683900  | C            | -3.07149100 | 3.35146400  | -0.75759400 |
| C | 3.18145200  | -4.31305700 | 2.28839200  | C            | -2.20082400 | 3.68755800  | 0.28517600  |
| C | 3.70829300  | -3.42380400 | 3.22754900  | C            | -3.21592000 | 4.23460700  | -1.83249800 |
| C | 3.99830400  | -2.10789900 | 2.86293800  | C            | -1.48141300 | 4.88096300  | 0.24792000  |
| C | 3.74918000  | -1.65693300 | 1.56083300  | H            | -2.08711700 | 3.01537200  | 1.12918700  |
| C | 3.97754500  | -0.22204500 | 1.17350800  | C            | -2.50369500 | 5.43504700  | -1.86897000 |
| C | 5.36095700  | 0.17586500  | 0.80006100  | H            | -3.89057100 | 3.97853400  | -2.64566500 |
| C | 5.63564000  | 1.50275300  | 0.41350500  | C            | -1.63248500 | 5.76014400  | -0.82787100 |
| C | 6.91745200  | 1.88386500  | 0.03402800  | H            | -0.80408800 | 5.12581100  | 1.06139300  |
| C | 7.96438400  | 0.95421200  | 0.03735200  | H            | -2.62944200 | 6.11338700  | -2.70842200 |
| C | 7.70769600  | -0.36057100 | 0.42484500  | H            | -1.07586100 | 6.69291500  | -0.85258300 |
| C | 6.42005800  | -0.74722300 | 0.80172600  | C            | -4.60749900 | 1.84540300  | 0.56512500  |
| N | 3.05155400  | 0.66954900  | 1.07578800  | C            | -5.85919700 | 2.44632500  | 0.73663100  |
| H | 3.07325200  | -2.22842000 | -0.40018100 | C            | -4.06566100 | 1.10124100  | 1.61556800  |
| H | 2.57486500  | -4.57383200 | 0.23319800  | C            | -6.55976000 | 2.30008400  | 1.93355700  |
| H | 3.89045000  | -3.75318600 | 4.24702600  | H            | -6.28927700 | 3.02633300  | -0.07654300 |
| H | 4.39773200  | -1.41595600 | 3.59910800  | C            | -4.76654100 | 0.94683600  | 2.81328500  |
| H | 4.82133500  | 2.21901100  | 0.42152500  | H            | -3.09777600 | 0.63161800  | 1.48745100  |
| H | 7.10610700  | 2.91282000  | -0.26210600 | C            | -6.01604600 | 1.54633600  | 2.97677300  |
| H | 8.51021400  | -1.09380000 | 0.43247600  | H            | -7.53405100 | 2.76753900  | 2.04901300  |
| H | 6.23614900  | -1.77607400 | 1.09267400  | H            | -4.33625100 | 0.35438400  | 3.61625900  |
| H | 8.96612500  | 1.25479300  | -0.25743000 | H            | -6.56422700 | 1.42392100  | 3.90685900  |
| H | 2.95279400  | -5.33644500 | 2.57287400  | H            | -4.60528700 | 2.09780400  | -1.53925200 |
| C | 0.87971600  | 1.71661500  | 1.14629900  | C            | -3.41243500 | -3.52856000 | -1.24030400 |
| O | 1.57663600  | 2.85858700  | 0.97969800  | H            | -3.03769800 | -4.53241100 | -1.46012500 |
| O | -0.35899500 | 1.71008700  | 1.11362500  | N            | 0.05863800  | -1.24634000 | 0.66414400  |
| C | 0.81515700  | 4.07303500  | 0.72839300  | N            | 0.28953700  | -1.35311400 | -1.62116400 |
| H | -0.04407200 | 3.80823800  | 0.10851000  | N            | -1.82077000 | -1.79525100 | -0.69879900 |
| C | 1.67696200  | 0.48262300  | 1.26971300  | C            | -0.48743900 | -1.49745700 | -0.49488300 |
| H | 1.29175400  | -0.12206800 | 0.05379500  | C            | -2.52324200 | -1.34464600 | -1.91096500 |
| C | 1.13724200  | -0.43409500 | 2.37294800  | H            | -1.80052300 | -0.91783400 | -2.60501000 |
| H | 1.27881600  | -1.49538900 | 2.17074600  | O            | -4.73841800 | -0.33515400 | -1.76053900 |
| H | 1.62987100  | -0.21920300 | 3.33195400  | C            | -3.52555200 | -0.21776600 | -1.56891800 |
| H | 0.06793000  | -0.25403800 | 2.49278500  | N            | -2.97814800 | 0.92045600  | -1.07575900 |
| C | 1.75047200  | 5.00530900  | -0.02308100 | H            | -1.96990800 | 1.01745800  | -0.93058800 |
| H | 2.09753300  | 4.54434100  | -0.95373800 | C            | -2.56532900 | -2.90151000 | -0.07137000 |
| H | 1.22831800  | 5.93570700  | -0.27294600 | H            | -1.84197800 | -3.61599000 | 0.32846400  |
| H | 2.62694000  | 5.25538700  | 0.58562900  | C            | -3.20594200 | -2.60412000 | -2.46047200 |
| C | 0.32656400  | 4.64773500  | 2.05075500  | H            | -2.55251900 | -3.07263800 | -3.20139000 |
| H | -0.22311400 | 5.57874200  | 1.87790200  | H            | -4.14861700 | -2.35414600 | -2.94976100 |
| H | -0.34611800 | 3.94522400  | 2.54882100  | H            | 1.16025500  | -0.85687400 | -1.46372100 |
| H | 1.17422600  | 4.86153800  | 2.71231200  | H            | 1.19271300  | -0.60701800 | 0.56670400  |

|   |             |             |             |   |             |             |             |
|---|-------------|-------------|-------------|---|-------------|-------------|-------------|
| C | 4.12647500  | 2.17426700  | 1.63713200  | C | 0.54135000  | -1.63781100 | -4.04517400 |
| C | 5.17298400  | 3.03040300  | 1.96166300  | C | 1.57776800  | -3.30339900 | -2.44840600 |
| C | 6.44570400  | 2.51875500  | 2.23346500  | H | -0.52398900 | -2.93757400 | -2.69195600 |
| C | 6.65720000  | 1.13984200  | 2.19199900  | C | 0.71485700  | -2.63657900 | -5.19623900 |
| C | 5.60603500  | 0.27939000  | 1.88083400  | H | 1.41436900  | -0.97134600 | -3.99333700 |
| C | 4.32546400  | 0.78222500  | 1.59295700  | H | -0.33152800 | -0.99789200 | -4.22048100 |
| C | 3.20734300  | -0.13332600 | 1.30118900  | C | 1.74317600  | -4.30493700 | -3.59933800 |
| C | 3.13620200  | -1.41720400 | 2.02710000  | H | 2.49473100  | -2.70374300 | -2.35091700 |
| C | 3.41399100  | -1.49567200 | 3.40480800  | H | 1.43511200  | -3.83108600 | -1.49767200 |
| C | 3.33247400  | -2.71211500 | 4.07754200  | C | 1.89261400  | -3.58642400 | -4.94572500 |
| C | 2.99031500  | -3.87927400 | 3.38659900  | H | 0.85268800  | -2.09550100 | -6.14008400 |
| C | 2.72776700  | -3.81767500 | 2.01680400  | H | -0.20751700 | -3.22631500 | -5.30373100 |
| C | 2.79915500  | -2.59950100 | 1.34437800  | H | 2.60928100  | -4.95033400 | -3.40885200 |
| N | 2.24544500  | 0.11582700  | 0.42680300  | H | 0.86191200  | -4.96196600 | -3.63429800 |
| H | 3.14276500  | 2.57687000  | 1.42020000  | H | 1.97052000  | -4.31744800 | -5.75990600 |
| H | 4.99779800  | 4.10207100  | 1.99772100  | H | 2.82880400  | -3.00982200 | -4.94520500 |
| H | 7.64310100  | 0.73218200  | 2.39830600  | C | -0.69639900 | -1.01691000 | 1.89337300  |
| H | 5.77687800  | -0.79189300 | 1.84724400  | C | -0.55053600 | -2.21249900 | 2.84990700  |
| H | 3.67809500  | -0.59290500 | 3.94657800  | C | -0.20503300 | 0.26994300  | 2.58233000  |
| H | 3.53569500  | -2.75080700 | 5.14425500  | H | -1.75496100 | -0.89013300 | 1.64595900  |
| H | 2.47214300  | -4.72054700 | 1.46854800  | C | -1.28445000 | -1.97280500 | 4.17453400  |
| H | 2.60917700  | -2.55663000 | 0.27755100  | H | 0.51535300  | -2.36837600 | 3.04679400  |
| H | 2.93507000  | -4.82835500 | 3.91238300  | H | -0.91775700 | -3.12418100 | 2.36450100  |
| H | 7.26446700  | 3.19096100  | 2.47444300  | C | -0.94293700 | 0.51617800  | 3.90300600  |
| C | 1.00372500  | 1.51417600  | -1.07670500 | H | 0.86681200  | 0.16840000  | 2.79114200  |
| O | 1.07080500  | 2.10120000  | -2.31146200 | H | -0.31607400 | 1.11078700  | 1.89238400  |
| O | -0.08610900 | 1.40801300  | -0.48564100 | C | -0.80690000 | -0.68175800 | 4.85052000  |
| C | -0.13914400 | 2.69908400  | -2.78148200 | H | -1.13627300 | -2.83169000 | 4.84098000  |
| H | -0.49374400 | 3.46373400  | -2.08899900 | H | -2.36636000 | -1.90237600 | 3.98971800  |
| H | -0.92394000 | 1.95079900  | -2.92703000 | H | -0.55084400 | 1.42419400  | 4.37819200  |
| H | 0.11517300  | 3.15401300  | -3.74133100 | H | -2.00617500 | 0.70558500  | 3.70340700  |
| C | 4.55325900  | 0.46155100  | -1.47441800 | H | -1.36945900 | -0.50456400 | 5.77615400  |
| C | 3.54133600  | 1.41891800  | -1.26190900 | H | 0.24884300  | -0.79659900 | 5.13550300  |
| C | 3.79583900  | 2.73507200  | -1.68985500 | C | -4.86273000 | -3.60885400 | -0.71250600 |
| C | 4.99390300  | 3.07313500  | -2.31630200 | H | -5.41924800 | -2.72963100 | -1.05337700 |
| C | 5.98378000  | 2.10983600  | -2.51983300 | H | -5.38812000 | -4.49980600 | -1.07208700 |
| C | 5.75302600  | 0.79916100  | -2.09256200 | C | -3.60054000 | -2.53353200 | 1.01503100  |
| H | 4.39449600  | -0.56154500 | -1.14533300 | H | -3.18003300 | -2.54896700 | 2.02220600  |
| H | 3.04115300  | 3.49685900  | -1.52760500 | H | -3.98748600 | -1.52739200 | 0.82794800  |
| H | 5.16000300  | 4.09973700  | -2.63363200 | C | -4.72436800 | -3.55626600 | 0.81522000  |
| H | 6.92179400  | 2.37539800  | -2.99958500 | H | -4.42048100 | -4.53572000 | 1.20964900  |
| H | 6.51147200  | 0.03496000  | -2.24347700 | H | -5.65176000 | -3.26927300 | 1.32200800  |
| C | 2.27393400  | 1.03988600  | -0.61020400 |   |             |             |             |
| C | 0.39645800  | -2.34873900 | -2.69340300 |   |             |             |             |

**DP-IM**

|   |             |             |             |   |             |             |             |
|---|-------------|-------------|-------------|---|-------------|-------------|-------------|
| C | -3.57477400 | 2.27115100  | -1.11558800 | C | 5.29851800  | 3.26946700  | 1.04782900  |
| C | -2.59958400 | 3.42493900  | -1.29453800 | C | 6.55518900  | 2.83574500  | 1.48173300  |
| C | -1.63952800 | 3.71104800  | -0.31695500 | C | 6.73435300  | 1.50380400  | 1.85828400  |
| C | -2.63243400 | 4.19573700  | -2.46061600 | C | 5.66710100  | 0.61062600  | 1.80009600  |
| C | -0.71430000 | 4.73446300  | -0.51329200 | C | 4.40178700  | 1.03172900  | 1.35309200  |
| H | -1.61292900 | 3.12755500  | 0.59747000  | C | 3.27554700  | 0.09365000  | 1.32378300  |
| C | -1.71515900 | 5.23130900  | -2.65488400 | C | 3.14898200  | -0.95162000 | 2.34777900  |
| H | -3.37599900 | 3.97800900  | -3.22333500 | C | 3.45697700  | -0.68480400 | 3.69659900  |
| C | -0.74870600 | 5.49775900  | -1.68360600 | C | 3.31228700  | -1.67377400 | 4.66448300  |
| H | 0.03361500  | 4.93653500  | 0.24856000  | C | 2.87163600  | -2.95243800 | 4.30648700  |
| H | -1.75274600 | 5.82314800  | -3.56540400 | C | 2.57688500  | -3.23264500 | 2.97103900  |
| H | -0.02921900 | 6.29800400  | -1.83402200 | C | 2.71354500  | -2.24341600 | 2.00007600  |
| C | -4.34609000 | 2.38604600  | 0.19544400  | N | 2.34026300  | 0.12884900  | 0.37215000  |
| C | -5.42279700 | 3.27609500  | 0.27793900  | H | 3.26395400  | 2.71937200  | 0.63266300  |
| C | -3.98454500 | 1.65468700  | 1.32805800  | H | 5.15015900  | 4.30623100  | 0.75953000  |
| C | -6.12593900 | 3.43102500  | 1.47182700  | H | 7.70790800  | 1.15715000  | 2.19322800  |
| H | -5.71018900 | 3.85016100  | -0.59999600 | H | 5.81303700  | -0.42502500 | 2.08858600  |
| C | -4.68989700 | 1.80279800  | 2.52446500  | H | 3.78957500  | 0.30815300  | 3.98098200  |
| H | -3.15796600 | 0.95749200  | 1.26477400  | H | 3.54063000  | -1.44702900 | 5.70208700  |
| C | -5.76208100 | 2.69220600  | 2.60113600  | H | 2.24311600  | -4.22497200 | 2.68098500  |
| H | -6.96241500 | 4.12323300  | 1.51971000  | H | 2.49893300  | -2.47274100 | 0.96311000  |
| H | -4.40156700 | 1.21821100  | 3.39400200  | H | 2.76490400  | -3.72415500 | 5.06352900  |
| H | -6.31301700 | 2.80734600  | 3.53052100  | H | 7.38728900  | 3.53280000  | 1.52404600  |
| H | -4.30862600 | 2.31397600  | -1.92598000 | C | 1.11240300  | 1.07295200  | -1.43694200 |
| C | -3.81888200 | -3.37025200 | -0.83329400 | O | 1.15328200  | 1.30596500  | -2.77736800 |
| H | -3.52309700 | -4.42096000 | -0.90934500 | O | 0.05846500  | 1.16501500  | -0.78949200 |
| N | -0.13839800 | -1.31934300 | 0.91311400  | C | -0.04459900 | 1.83329500  | -3.35604200 |
| N | 0.09880600  | -1.84897400 | -1.32275600 | H | -0.32726500 | 2.77346900  | -2.88006400 |
| N | -2.07910900 | -1.73663600 | -0.42864800 | H | -0.87070300 | 1.12177000  | -3.27417600 |
| C | -0.70347700 | -1.65084000 | -0.19937200 | H | 0.19193100  | 2.00353300  | -4.40828200 |
| C | -2.66681800 | -1.39543700 | -1.73174300 | C | 4.67051000  | -0.11844500 | -1.50633000 |
| H | -1.86234500 | -1.16830200 | -2.43308800 | C | 3.66083400  | 0.86026700  | -1.59956900 |
| O | -4.75371000 | -0.12561900 | -1.82204600 | C | 3.93069800  | 2.00517400  | -2.37271100 |
| C | -3.53889600 | -0.12403600 | -1.60598900 | C | 5.14704600  | 2.15644800  | -3.03493000 |
| N | -2.86561900 | 0.99872800  | -1.25529900 | C | 6.13657600  | 1.17738900  | -2.93010600 |
| H | -1.85431800 | 0.97972800  | -1.10783200 | C | 5.88732000  | 0.03653700  | -2.16187700 |
| C | -2.96454200 | -2.66747500 | 0.28585400  | H | 4.49577500  | -1.01068300 | -0.91202700 |
| H | -2.34172500 | -3.38680400 | 0.82413100  | H | 3.17715100  | 2.78108700  | -2.44840700 |
| C | -3.48636600 | -2.62795900 | -2.14700900 | H | 5.32806600  | 3.05276500  | -3.62269700 |
| H | -2.88713700 | -3.25409000 | -2.81302100 | H | 7.08909200  | 1.30018500  | -3.43799000 |
| H | -4.38728600 | -2.32942700 | -2.68563200 | H | 6.64549800  | -0.73738400 | -2.07390200 |
| H | 1.04876800  | -1.53248000 | -1.16099900 | C | 2.38531300  | 0.69419300  | -0.89420500 |
| H | 1.45213400  | -0.37542800 | 0.60743900  | C | 0.08430400  | -3.12277200 | -2.05355100 |
| C | 4.23516900  | 2.37789100  | 0.97421200  | C | 0.49817600  | -2.88293400 | -3.50929900 |

|              |             |             |             |   |             |            |             |
|--------------|-------------|-------------|-------------|---|-------------|------------|-------------|
| C            | 0.98916500  | -4.17370900 | -1.38892500 | C | -2.30831900 | 2.06670200 | 3.26452000  |
| H            | -0.94242600 | -3.49771500 | -2.03442800 | C | -3.28547500 | 1.23729800 | 4.11833200  |
| C            | 0.53285800  | -4.19011700 | -4.31142300 | H | -4.20868200 | 1.02463400 | 3.57559700  |
| H            | 1.49453300  | -2.41667900 | -3.51606200 | H | -3.53440100 | 1.78518200 | 5.03495700  |
| H            | -0.18832800 | -2.16117700 | -3.96778900 | H | -2.83104500 | 0.28251000 | 4.40927200  |
| C            | 1.01494300  | -5.48285900 | -2.18898500 | C | -1.01334300 | 2.29499900 | 4.04591300  |
| H            | 2.00887500  | -3.76411900 | -1.32578800 | H | -0.55947000 | 1.34348900 | 4.33134600  |
| H            | 0.65207000  | -4.35253400 | -0.36055000 | H | -1.22987400 | 2.86130500 | 4.95969800  |
| C            | 1.43503200  | -5.23615500 | -3.64369900 | H | -0.28049200 | 2.84713100 | 3.45902700  |
| H            | 0.87021400  | -3.99175000 | -5.33602000 | O | -0.83641200 | 1.04822000 | 1.64307500  |
| H            | -0.48788700 | -4.59237900 | -4.38940700 | O | -2.63696700 | 1.64478900 | -1.58708100 |
| H            | 1.69065800  | -6.20285900 | -1.71083100 | C | -0.82789200 | 5.62143800 | -0.13705000 |
| H            | 0.01208700  | -5.93413100 | -2.17324300 | H | -0.27927200 | 6.16403200 | -0.90211900 |
| H            | 1.41169700  | -6.17534400 | -4.21036100 | C | -1.87101900 | 4.76188600 | -0.50741000 |
| H            | 2.47533200  | -4.88012300 | -3.66269500 | C | -2.23134600 | 4.52184000 | -1.95586500 |
| C            | -0.90222700 | -0.78497400 | 2.03232800  | H | -2.08002400 | 5.43499100 | -2.54350500 |
| C            | -0.95760100 | -1.80203300 | 3.18490100  | H | -3.29151700 | 4.26006300 | -2.02335000 |
| C            | -0.25063800 | 0.52286100  | 2.51791200  | C | -1.40536600 | 3.38904100 | -2.64528600 |
| H            | -1.93057000 | -0.55710000 | 1.72571100  | C | 0.04321900  | 3.82586900 | -2.86448200 |
| C            | -1.67310300 | -1.23139500 | 4.41541100  | H | 0.53721600  | 4.08875300 | -1.92978200 |
| H            | 0.06978900  | -2.07756200 | 3.45219100  | H | 0.07214500  | 4.70028600 | -3.52480300 |
| H            | -1.45205900 | -2.71977400 | 2.84407900  | H | 0.62333500  | 3.02736400 | -3.33343100 |
| C            | -0.96412900 | 1.10047100  | 3.74514700  | C | -2.05024900 | 3.04854500 | -4.00205100 |
| H            | 0.79182300  | 0.31071600  | 2.78500200  | H | -1.46998900 | 2.27824100 | -4.52373900 |
| H            | -0.23158600 | 1.23985600  | 1.69123000  | H | -2.07486700 | 3.94116900 | -4.63792600 |
| C            | -1.02164800 | 0.07562700  | 4.88445100  | H | -3.06993300 | 2.67579500 | -3.87973900 |
| H            | -1.67117300 | -1.97186700 | 5.22569400  | C | -1.47912100 | 2.14648700 | -1.75212600 |
| H            | -2.72806500 | -1.03940700 | 4.16962800  | O | -0.40564200 | 1.70462100 | -1.23072400 |
| H            | -0.44981900 | 2.01129300  | 4.07771800  | O | -3.06781700 | 0.99696700 | 1.27613300  |
| H            | -1.98431900 | 1.40242100  | 3.47288100  | C | -2.98723900 | 3.42421600 | 2.89499900  |
| H            | -1.56611600 | 0.48682000  | 5.74435200  | H | -3.99629100 | 3.20779100 | 2.53151200  |
| H            | 0.00159500  | -0.13764300 | 5.22643900  | H | -3.08762000 | 3.99725600 | 3.82454600  |
| C            | -5.28936500 | -3.26577200 | -0.36656200 | C | -2.24340600 | 4.23078000 | 1.85514000  |
| H            | -5.76068300 | -2.40339600 | -0.85029900 | C | -1.20057700 | 5.10114500 | 2.19979100  |
| H            | -5.87479300 | -4.15525000 | -0.62289300 | H | -0.94296500 | 5.24563300 | 3.24548100  |
| C            | -4.00517200 | -2.05593600 | 1.25022000  | C | -0.49846300 | 5.79011100 | 1.20901800  |
| H            | -3.62634500 | -1.94591600 | 2.26910200  | H | 0.30727600  | 6.46401200 | 1.48795100  |
| H            | -4.29802200 | -1.06436800 | 0.89146600  | C | -2.56789500 | 4.08441600 | 0.50080200  |
| C            | -5.20175200 | -3.00696200 | 1.14474800  | H | -3.37513500 | 3.41502400 | 0.22271200  |
| H            | -4.99291500 | -3.94092800 | 1.68485600  | C | -5.56414800 | 0.66205000 | -1.91673700 |
| H            | -6.12109600 | -2.58258600 | 1.56243500  | O | -5.84076200 | 1.88848400 | -1.45168900 |
|              |             |             |             | O | -5.42913800 | 0.39196400 | -3.09814300 |
|              |             |             |             | C | -5.98474900 | 2.91674500 | -2.44883200 |
|              |             |             |             | H | -6.16161200 | 3.83451000 | -1.88769500 |
| <b>G-IMI</b> |             |             |             |   |             |            |             |
| C            | -2.04008100 | 1.30742100  | 1.96026800  |   |             |            |             |

|    |             |             |             |   |            |             |             |
|----|-------------|-------------|-------------|---|------------|-------------|-------------|
| H  | -6.83594300 | 2.69923000  | -3.09941500 | N | 4.99968000 | -1.65594000 | 2.51195300  |
| H  | -5.07571000 | 3.00076400  | -3.04509400 | N | 6.34888700 | -0.77633700 | 0.87198900  |
| C  | -6.28238800 | -1.50897100 | 1.22819400  | N | 4.30927300 | -1.95639300 | 0.30222900  |
| C  | -5.99140800 | -0.30844100 | 0.55578100  | C | 5.26512600 | -1.41084800 | 1.17834500  |
| C  | -6.20967800 | 0.90528700  | 1.22971700  | C | 3.80167300 | -1.22299200 | -0.85430900 |
| C  | -6.72219700 | 0.90880200  | 2.52602700  | H | 4.61254700 | -0.80542100 | -1.45929100 |
| C  | -7.00767500 | -0.28644900 | 3.18736600  | O | 1.85625600 | -0.26339000 | 0.25153800  |
| C  | -6.77938600 | -1.49598200 | 2.52936500  | C | 2.88599300 | -0.06907300 | -0.41582400 |
| H  | -6.12074000 | -2.46521000 | 0.74229900  | N | 3.31304800 | 1.14476200  | -0.80394000 |
| H  | -5.97274000 | 1.83992300  | 0.74459600  | H | 4.22663300 | 1.18966000  | -1.23521600 |
| H  | -6.88624000 | 1.86019300  | 3.02477600  | C | 4.06123200 | -3.39889900 | 0.19769000  |
| H  | -7.40054800 | -0.27604100 | 4.19981100  | H | 4.95751200 | -3.94480000 | 0.51032900  |
| H  | -6.99564300 | -2.43873900 | 3.02406900  | C | 3.04410000 | -2.29018600 | -1.66519700 |
| C  | -5.44726500 | -0.34170400 | -0.82885900 | H | 3.06811400 | -2.06801500 | -2.73586300 |
| N  | -5.24578700 | -1.55856700 | -1.34779100 | H | 1.99797600 | -2.30949300 | -1.35147900 |
| N  | -5.04651900 | -2.58691600 | -1.76615500 | H | 5.74754700 | -1.30038400 | 3.10022000  |
| Rh | -0.46550400 | -0.02069000 | -0.08471800 | C | 3.66648900 | -1.55497100 | 3.11331300  |
| Rh | -2.84899700 | -0.06462700 | -0.46825900 | C | 3.56284000 | -2.52111700 | 4.29842800  |
| C  | 2.72254200  | 2.41850400  | -0.39274700 | C | 3.32356300 | -0.12388000 | 3.54595800  |
| C  | 3.12110200  | 3.50343000  | -1.39167000 | H | 2.95286500 | -1.85063700 | 2.34318600  |
| C  | 3.13854200  | 4.84860400  | -1.00021400 | C | 2.16827900 | -2.47065000 | 4.93283700  |
| C  | 3.40522700  | 3.19057100  | -2.72710500 | H | 4.32075200 | -2.24608500 | 5.04821100  |
| C  | 3.42617000  | 5.85508500  | -1.92212500 | H | 3.80322800 | -3.53802800 | 3.96579800  |
| H  | 2.91841100  | 5.11054700  | 0.02890900  | C | 1.92948700 | -0.06012200 | 4.18071000  |
| C  | 3.70360100  | 4.19627800  | -3.64847700 | H | 4.08025100 | 0.22385300  | 4.26516300  |
| H  | 3.37044200  | 2.15812900  | -3.06081800 | H | 3.37016200 | 0.54145100  | 2.68102900  |
| C  | 3.71349200  | 5.53347200  | -3.25044700 | C | 1.79000700 | -1.04328900 | 5.35026700  |
| H  | 3.43125500  | 6.89246900  | -1.59874600 | H | 2.11885500 | -3.14872700 | 5.79439900  |
| H  | 3.92091100  | 3.93130100  | -4.67967200 | H | 1.43682000 | -2.83768600 | 4.20069800  |
| H  | 3.94280800  | 6.31723900  | -3.96696800 | H | 1.72691300 | 0.96340200  | 4.51356600  |
| C  | 3.11371400  | 2.77124200  | 1.03384400  | H | 1.18093800 | -0.28779300 | 3.40982400  |
| C  | 2.13206300  | 3.13716000  | 1.95650400  | H | 0.76481200 | -1.02560800 | 5.74305900  |
| C  | 4.45944300  | 2.77523800  | 1.42235000  | H | 2.44829000 | -0.72388700 | 6.17226600  |
| C  | 2.49290700  | 3.51710000  | 3.25249800  | C | 6.95950600 | -0.90472400 | -0.44037500 |
| H  | 1.08818500  | 3.11676100  | 1.66033100  | C | 7.12330100 | 0.46962600  | -1.11111300 |
| C  | 4.81877800  | 3.14150400  | 2.71757600  | C | 8.34578200 | -1.56072100 | -0.27865000 |
| H  | 5.22883300  | 2.47776200  | 0.71562300  | H | 6.38146000 | -1.55694600 | -1.11372900 |
| C  | 3.83440200  | 3.51982800  | 3.63577000  | C | 7.85396200 | 0.37259400  | -2.45608900 |
| H  | 1.72419200  | 3.80184100  | 3.96476300  | H | 7.68385000 | 1.12000500  | -0.42560000 |
| H  | 5.86491300  | 3.12978300  | 3.01063500  | H | 6.14168900 | 0.93982600  | -1.24842500 |
| H  | 4.11272000  | 3.80815800  | 4.64576100  | C | 9.08382000 | -1.67332800 | -1.61876200 |
| H  | 1.63724100  | 2.29451200  | -0.43758400 | H | 8.93423100 | -0.95566100 | 0.42496700  |
| C  | 3.74614200  | -3.61212900 | -1.30097400 | H | 8.22715900 | -2.55122000 | 0.17772000  |
| H  | 4.67041400  | -3.70664300 | -1.88091400 | C | 9.22131600 | -0.30516700 | -2.29864200 |

|   |             |             |             |              |             |             |             |
|---|-------------|-------------|-------------|--------------|-------------|-------------|-------------|
| H | 7.96997900  | 1.37192200  | -2.89432300 | O            | -2.48642700 | -1.14246100 | -2.17267100 |
| H | 7.24094300  | -0.21040900 | -3.15963300 | C            | -1.29251400 | -1.41402500 | -2.50748500 |
| H | 10.07237600 | -2.12509600 | -1.46714100 | C            | -1.08180900 | -2.19605400 | -3.80726700 |
| H | 8.52785600  | -2.35173200 | -2.28297900 | C            | -0.21556800 | -1.33374300 | -4.74591900 |
| H | 9.70922500  | -0.41022900 | -3.27601500 | H            | 0.73914200  | -1.07635400 | -4.27804300 |
| H | 9.87135200  | 0.33700700  | -1.68686800 | H            | -0.01337000 | -1.88055100 | -5.67406600 |
| C | 2.86435300  | -4.87893300 | -1.38417600 | H            | -0.73279400 | -0.40298100 | -5.00737400 |
| H | 1.94027100  | -4.67367200 | -1.93119700 | C            | -2.42382900 | -2.51061300 | -4.47879100 |
| H | 3.37289400  | -5.69072600 | -1.91388600 | H            | -2.96738600 | -1.59241200 | -4.72028600 |
| C | 2.82851700  | -3.99780000 | 0.90463500  | H            | -2.24546700 | -3.06133400 | -5.41006300 |
| H | 1.99033100  | -3.29610300 | 0.82796700  | H            | -3.06391700 | -3.11842400 | -3.83488400 |
| H | 2.99877700  | -4.20188200 | 1.96509200  |              |             |             |             |
| C | 2.55707200  | -5.26954600 | 0.08672500  |              |             |             |             |
| H | 3.24076200  | -6.06450300 | 0.41045000  | <b>G-TS1</b> |             |             |             |
| H | 1.53835500  | -5.64686900 | 0.21308400  | C            | -2.07982200 | 1.79145500  | 1.43349100  |
| O | -0.25215400 | -1.08627100 | -1.84915600 | C            | -2.37896800 | 2.93235000  | 2.41598000  |
| C | -0.30673800 | -3.50657800 | -3.47405100 | C            | -2.95336400 | 2.28490500  | 3.69378800  |
| H | 0.69565200  | -3.22793300 | -3.13912300 | H            | -3.87005200 | 1.72825800  | 3.47882200  |
| H | -0.19466100 | -4.06194300 | -4.41271000 | H            | -3.18373700 | 3.06116000  | 4.43264900  |
| C | -0.96189700 | -4.38210800 | -2.42973000 | H            | -2.22589500 | 1.59814600  | 4.14338300  |
| C | -1.84604400 | -5.40793700 | -2.78749900 | C            | -1.11791900 | 3.72861100  | 2.76170000  |
| H | -2.04626000 | -5.60171000 | -3.83808900 | H            | -0.36401300 | 3.09282000  | 3.23043000  |
| C | -2.45967800 | -6.18696800 | -1.80538600 | H            | -1.37511600 | 4.52721100  | 3.46775700  |
| H | -3.13507400 | -6.98798100 | -2.09441500 | H            | -0.67104400 | 4.18301900  | 1.87707400  |
| C | -0.70782400 | -4.16448100 | -1.06926300 | O            | -0.87596900 | 1.49860600  | 1.16406400  |
| H | -0.01740900 | -3.38084800 | -0.78035000 | O            | -2.80395800 | 0.98264100  | -1.97022400 |
| O | -2.94080200 | -1.79287600 | 0.62367300  | C            | -2.23528500 | 5.64579000  | -1.94302000 |
| O | -0.71789200 | -1.74668900 | 1.02875100  | H            | -1.91222100 | 6.08805300  | -2.88231600 |
| C | -2.20376400 | -5.94723900 | -0.45425900 | C            | -2.80130800 | 4.36423300  | -1.93859800 |
| H | -2.68020600 | -6.56117400 | 0.30576000  | C            | -2.92564400 | 3.55295700  | -3.20886400 |
| C | -1.32603000 | -4.92555700 | -0.06865000 | H            | -2.95781400 | 4.22100100  | -4.07752600 |
| C | -1.06390000 | -4.61477800 | 1.38786400  | H            | -3.86231200 | 2.99136700  | -3.19141300 |
| H | -1.18552200 | -5.52007600 | 1.99401900  | C            | -1.76558900 | 2.54082400  | -3.45335600 |
| H | -0.03215600 | -4.27460400 | 1.51089600  | C            | -0.42793500 | 3.27022600  | -3.61907700 |
| C | -2.00431800 | -3.52751700 | 1.99166500  | H            | -0.16361400 | 3.83028100  | -2.71927000 |
| C | -3.45644300 | -4.01765300 | 2.03162000  | H            | -0.49313300 | 3.97466600  | -4.45661000 |
| H | -3.83734700 | -4.23427800 | 1.03066000  | H            | 0.38211600  | 2.56505000  | -3.82710000 |
| H | -3.51576000 | -4.93359500 | 2.63141100  | C            | -2.07753100 | 1.72418400  | -4.72470200 |
| H | -4.10880500 | -3.26699900 | 2.48659000  | H            | -1.28305000 | 0.99530800  | -4.92390400 |
| C | -1.52911200 | -3.18949600 | 3.41724300  | H            | -2.15228600 | 2.39187200  | -5.59076200 |
| H | -2.17246000 | -2.42609400 | 3.87050700  | H            | -3.02119400 | 1.18014800  | -4.62205500 |
| H | -1.56550500 | -4.08463900 | 4.04873200  | C            | -1.70554100 | 1.54857400  | -2.28576200 |
| H | -0.50450200 | -2.81106100 | 3.40786200  | O            | -0.58212900 | 1.34331100  | -1.73319000 |
| C | -1.87908900 | -2.25623500 | 1.14707300  | O            | -3.10205000 | 1.18654600  | 0.97260800  |
|   |             |             |             | C            | -3.46718600 | 3.86269700  | 1.79674100  |



|    |             |             |             |   |            |             |             |
|----|-------------|-------------|-------------|---|------------|-------------|-------------|
| H  | -4.37707400 | 3.27296200  | 1.65084600  | C | 3.75446700 | 1.70510200  | 3.55459500  |
| H  | -3.68977400 | 4.63348600  | 2.54379800  | C | 1.61747500 | 0.72943500  | 5.05994000  |
| C  | -3.06506600 | 4.51412600  | 0.49183200  | H | 0.47750900 | 0.88981500  | 3.23335200  |
| C  | -2.49054500 | 5.79158700  | 0.46036300  | C | 3.93732200 | 1.38405900  | 4.90091500  |
| H  | -2.35780500 | 6.34422600  | 1.38684200  | H | 4.59458100 | 2.07064100  | 2.96993000  |
| C  | -2.09260600 | 6.35818300  | -0.75115400 | C | 2.86720700 | 0.90180100  | 5.65934500  |
| H  | -1.66009100 | 7.35526900  | -0.76514500 | H | 0.78422400 | 0.33668900  | 5.63652700  |
| C  | -3.23425100 | 3.82868800  | -0.71827400 | H | 4.91562200 | 1.50881500  | 5.35692500  |
| H  | -3.70218700 | 2.85186300  | -0.70999000 | H | 3.01039300 | 0.65260400  | 6.70717300  |
| C  | -5.49795800 | -0.35789500 | -1.88260100 | H | 1.34978900 | 1.39142800  | 1.18946200  |
| O  | -5.75444800 | 0.95297600  | -2.03471700 | C | 4.07955200 | -1.16515500 | -3.26857800 |
| O  | -5.58186100 | -1.17868600 | -2.77731000 | H | 4.38845800 | -1.12318200 | -4.31730500 |
| C  | -6.10472700 | 1.36489300  | -3.36966100 | N | 5.93006600 | -2.07026900 | 0.72059700  |
| H  | -6.25536400 | 2.44242400  | -3.30998800 | N | 7.04951000 | -0.19690300 | 0.00235000  |
| H  | -7.02628600 | 0.87004200  | -3.68790600 | N | 5.00633600 | -0.93373700 | -1.11126400 |
| H  | -5.30014200 | 1.12633400  | -4.06757900 | C | 6.03860900 | -0.98408500 | -0.12894800 |
| C  | -5.41337600 | -0.35728100 | 1.96246000  | C | 4.26855500 | 0.31601700  | -1.30667600 |
| C  | -5.90039500 | -0.24994200 | 0.64471700  | H | 4.91027500 | 1.19418200  | -1.19431600 |
| C  | -7.22298600 | 0.19678500  | 0.44672900  | O | 2.13584300 | -0.28701200 | -0.29944700 |
| C  | -8.01697800 | 0.56048400  | 1.53043800  | C | 3.12812500 | 0.45369700  | -0.28880200 |
| C  | -7.51810000 | 0.45320800  | 2.83156500  | N | 3.29632200 | 1.46677400  | 0.59031200  |
| C  | -6.21897200 | -0.01596400 | 3.04432400  | H | 4.11345800 | 2.05450200  | 0.48442000  |
| H  | -4.40569700 | -0.71456000 | 2.12087800  | C | 5.25489000 | -1.63536400 | -2.39064100 |
| H  | -7.62562200 | 0.27422800  | -0.55662500 | H | 6.23466300 | -1.35459700 | -2.80421000 |
| H  | -9.02947300 | 0.91509200  | 1.36171100  | C | 3.73928200 | 0.24645000  | -2.76016000 |
| H  | -8.14191300 | 0.73002600  | 3.67683000  | H | 4.25507900 | 1.00429100  | -3.35788600 |
| H  | -5.83090700 | -0.10745900 | 4.05462200  | H | 2.66708400 | 0.45303800  | -2.80991000 |
| C  | -5.02191500 | -0.60864100 | -0.48763700 | H | 6.70470500 | -2.09166900 | 1.37853500  |
| Rh | -0.45450500 | -0.02679000 | -0.20306400 | C | 4.65584600 | -2.50614600 | 1.30461400  |
| Rh | -2.87871800 | -0.34408300 | -0.37920500 | C | 4.67076000 | -4.02222400 | 1.53174500  |
| C  | 2.24651500  | 1.91974100  | 1.50409900  | C | 4.35809600 | -1.74768900 | 2.60544700  |
| C  | 2.00518800  | 3.40394100  | 1.25306100  | H | 3.88053600 | -2.26147200 | 0.57589700  |
| C  | 2.39320200  | 4.40744500  | 2.14279900  | C | 3.37635700 | -4.50520500 | 2.20083700  |
| C  | 1.36463700  | 3.76117800  | 0.05669000  | H | 5.52978600 | -4.27659600 | 2.17149500  |
| C  | 2.14760200  | 5.75164000  | 1.84311300  | H | 4.82492200 | -4.53244100 | 0.57373100  |
| H  | 2.87388500  | 4.14580000  | 3.07967100  | C | 3.06706100 | -2.23827800 | 3.27094200  |
| C  | 1.12275000  | 5.09893100  | -0.24306400 | H | 5.20322700 | -1.88513100 | 3.29809900  |
| H  | 1.02871500  | 2.98294000  | -0.62283100 | H | 4.29233800 | -0.67693600 | 2.39324600  |
| C  | 1.51333500  | 6.10077500  | 0.65182800  | C | 3.11222200 | -3.75221600 | 3.51039900  |
| H  | 2.45062500  | 6.52235400  | 2.54690300  | H | 3.42861200 | -5.58646800 | 2.38068800  |
| H  | 0.60433800  | 5.35966600  | -1.15939400 | H | 2.53417500 | -4.34120800 | 1.51397900  |
| H  | 1.31480800  | 7.14425900  | 0.42282100  | H | 2.90834000 | -1.70120000 | 4.21191300  |
| C  | 2.50212300  | 1.54463300  | 2.95046500  | H | 2.21541300 | -1.99470300 | 2.62168100  |
| C  | 1.43957600  | 1.04284600  | 3.71155300  | H | 2.17566100 | -4.09686400 | 3.96481700  |

|   |             |             |             |               |             |             |             |
|---|-------------|-------------|-------------|---------------|-------------|-------------|-------------|
| H | 3.91413000  | -3.98242300 | 4.22783100  | H             | -0.47671800 | -4.72490900 | 3.36281600  |
| C | 7.40524600  | 0.77481100  | -1.01705700 | H             | 0.48922700  | -3.56582500 | 2.44712500  |
| C | 7.33354700  | 2.19677700  | -0.43240500 | C             | -1.51894400 | -2.90500700 | 2.87685700  |
| C | 8.83395800  | 0.48861400  | -1.51466400 | C             | -2.90260900 | -3.49318500 | 3.17314700  |
| H | 6.74817000  | 0.72984600  | -1.89849300 | H             | -3.31303400 | -4.01834200 | 2.30729000  |
| C | 7.79102900  | 3.25418700  | -1.44408500 | H             | -2.82739500 | -4.20400600 | 4.00427700  |
| H | 7.97146500  | 2.23032400  | 0.46145600  | H             | -3.61213000 | -2.71057900 | 3.46004600  |
| H | 6.31078800  | 2.40849800  | -0.09194100 | C             | -0.99339600 | -2.14315800 | 4.11050300  |
| C | 9.29945200  | 1.53704100  | -2.53320600 | H             | -1.66824500 | -1.32123400 | 4.37982100  |
| H | 9.50879300  | 0.48027100  | -0.64752600 | H             | -0.92862200 | -2.82251000 | 4.96820200  |
| H | 8.86941000  | -0.51664300 | -1.95285900 | H             | -0.00075700 | -1.72664500 | 3.92237200  |
| C | 9.20604600  | 2.95649200  | -1.95782000 | C             | -1.57319400 | -1.91473600 | 1.70978900  |
| H | 7.75191000  | 4.25216500  | -0.98962300 | O             | -2.52825700 | -1.85460600 | -1.70680900 |
| H | 7.09279100  | 3.26899800  | -2.29417000 | C             | -1.33388400 | -2.12281100 | -2.05490900 |
| H | 10.32718700 | 1.32127200  | -2.85163000 | C             | -1.15246800 | -3.24198100 | -3.08638000 |
| H | 8.67159200  | 1.47116400  | -3.43425900 | C             | -0.55182800 | -2.60959000 | -4.35782000 |
| H | 9.50007600  | 3.69548300  | -2.71408900 | H             | 0.38846700  | -2.09835800 | -4.14317700 |
| H | 9.91780600  | 3.05416700  | -1.12513600 | H             | -0.36291000 | -3.38616500 | -5.10825800 |
| C | 2.97099700  | -2.24154200 | -3.08360900 | H             | -1.24911200 | -1.88254200 | -4.79132700 |
| H | 2.07491800  | -1.81409600 | -2.62888400 | C             | -2.49843000 | -3.89278100 | -3.43003600 |
| H | 2.68444300  | -2.64453000 | -4.06102200 | H             | -3.18920400 | -3.16022600 | -3.85657200 |
| C | 5.09185000  | -3.15279700 | -2.28027300 | H             | -2.34192900 | -4.68982600 | -4.16675000 |
| H | 5.64479200  | -3.57251400 | -1.43592400 | H             | -2.97753800 | -4.32737900 | -2.54975700 |
| H | 5.48556800  | -3.60701700 | -3.19969400 | N             | -5.06639600 | -2.38911300 | -0.50283000 |
| C | 3.57068500  | -3.35494700 | -2.19092400 | N             | -4.69227100 | -3.38763600 | -0.19311100 |
| H | 3.26477700  | -4.35873100 | -2.50385900 |               |             |             |             |
| H | 3.23603500  | -3.22099500 | -1.15926400 |               |             |             |             |
| O | -0.29332000 | -1.53606400 | -1.62520500 | <b>TS3-R'</b> |             |             |             |
| C | -0.15554200 | -4.29004500 | -2.50472100 | C             | -3.41343600 | -0.68720300 | 1.61898500  |
| H | 0.80874200  | -3.79849700 | -2.36163300 | C             | -3.20102400 | -0.22888800 | 3.06671400  |
| H | -0.02080700 | -5.06847600 | -3.26499100 | C             | -2.77389400 | -1.08065600 | 4.08897300  |
| C | -0.60927600 | -4.90749700 | -1.20123800 | C             | -3.46232900 | 1.11469100  | 3.38048800  |
| C | -1.36171200 | -6.08938100 | -1.17651400 | C             | -2.57847100 | -0.59654900 | 5.38627700  |
| H | -1.58185500 | -6.60510200 | -2.10778600 | H             | -2.58204600 | -2.12624800 | 3.87923200  |
| C | -1.82590300 | -6.60832200 | 0.03305200  | C             | -3.27018300 | 1.59841400  | 4.67228300  |
| H | -2.40162300 | -7.53028000 | 0.04102900  | H             | -3.82414100 | 1.78259400  | 2.60483900  |
| C | -0.31937400 | -4.27487100 | 0.01465900  | C             | -2.81692100 | 0.74414600  | 5.68215800  |
| H | 0.27819600  | -3.36998700 | 0.00942900  | H             | -2.23462800 | -1.27430400 | 6.16308800  |
| O | -2.70822100 | -1.69552300 | 1.16952100  | H             | -3.47537700 | 2.64279500  | 4.89212400  |
| O | -0.48177900 | -1.37302700 | 1.36281800  | H             | -2.66123600 | 1.12058200  | 6.68943800  |
| C | -1.55021400 | -5.95027700 | 1.23259500  | C             | -3.12567600 | -2.15448900 | 1.36526400  |
| H | -1.91345100 | -6.35904400 | 2.17212900  | C             | -4.18032500 | -3.00077700 | 1.00698700  |
| C | -0.79351400 | -4.77146500 | 1.23642100  | C             | -1.84324000 | -2.69948800 | 1.52645500  |
| C | -0.49768500 | -4.02722700 | 2.51748900  | C             | -3.97086500 | -4.36944000 | 0.82395100  |
|   |             |             |             | H             | -5.17672900 | -2.58486400 | 0.87920600  |

|   |             |             |             |   |             |             |             |
|---|-------------|-------------|-------------|---|-------------|-------------|-------------|
| C | -1.63660900 | -4.06793100 | 1.35358700  | C | -0.10892200 | -2.35926900 | -1.66926400 |
| H | -1.01047300 | -2.05536300 | 1.78953800  | H | -1.64348100 | -0.97931100 | -2.22121700 |
| C | -2.69733900 | -4.90792600 | 1.00591900  | C | -1.35971900 | -2.82446900 | -4.31051300 |
| H | -4.80279500 | -5.01108400 | 0.54654700  | H | 0.47119900  | -1.66894500 | -4.31352500 |
| H | -0.64191800 | -4.48124500 | 1.48808100  | H | -0.97405500 | -0.70107600 | -4.59914400 |
| H | -2.52885900 | -5.97291700 | 0.87140300  | C | -0.90220000 | -3.63739400 | -1.96530200 |
| H | -4.46342700 | -0.50914900 | 1.37603800  | H | 0.94495700  | -2.53619000 | -1.90377800 |
| C | -3.13287400 | 2.81757800  | -3.07471500 | H | -0.16655000 | -2.08798300 | -0.61271600 |
| H | -2.52426200 | 3.55841300  | -3.60110300 | C | -0.85349400 | -3.99198300 | -3.45568100 |
| N | 0.15168100  | 0.03390800  | -2.26251700 | H | -1.28761300 | -3.06663600 | -5.37820400 |
| N | 0.54321400  | 1.99107000  | -1.14624400 | H | -2.42505900 | -2.65666700 | -4.09584500 |
| N | -1.68328800 | 1.40165700  | -1.81054400 | H | -0.50485300 | -4.46402600 | -1.36514400 |
| C | -0.32047600 | 1.18577500  | -1.72649700 | H | -1.94637400 | -3.50250700 | -1.65268600 |
| C | -2.43354200 | 2.13965000  | -0.79378700 | H | -1.44652800 | -4.89377300 | -3.65412300 |
| H | -1.74810000 | 2.58816900  | -0.07728900 | H | 0.18434900  | -4.22348800 | -3.73728400 |
| O | -4.54981900 | 1.36592000  | 0.13286300  | C | -4.48185800 | 2.57731100  | -3.76439700 |
| C | -3.33173500 | 1.18816100  | 0.03731400  | H | -5.21710200 | 3.35691500  | -3.53698000 |
| N | -2.68346400 | 0.19192300  | 0.69122800  | H | -4.34288200 | 2.56172400  | -4.85360200 |
| H | -1.66535400 | 0.13280300  | 0.68376800  | C | -3.58321000 | 0.38359200  | -3.22181900 |
| C | -2.43170600 | 1.42770000  | -3.07694300 | H | -3.44157200 | -0.17718900 | -4.15189100 |
| H | -1.71560600 | 1.32337400  | -3.89248200 | H | -3.57441200 | -0.34151600 | -2.40420300 |
| C | -3.24453600 | 3.19513600  | -1.57223400 | C | -4.90042400 | 1.18541200  | -3.26325300 |
| H | -2.83442800 | 4.19186700  | -1.39117600 | H | -5.65886300 | 0.71585900  | -3.89811500 |
| H | -4.27935500 | 3.18945600  | -1.22643500 | H | -5.31415500 | 1.26463700  | -2.25332500 |
| H | 1.16119400  | -0.07078900 | -2.17837000 | H | 1.48662200  | 1.43067000  | -0.40373100 |
| C | 0.38902000  | 3.43523100  | -1.00521800 | C | 1.92334000  | -2.99145900 | 1.64529800  |
| C | 0.48596600  | 3.86823300  | 0.46825700  | C | 1.74185700  | -3.35101000 | 2.97941000  |
| C | 1.48059500  | 4.13658300  | -1.83597100 | C | 2.48860700  | -2.72489900 | 3.98065200  |
| H | -0.57971500 | 3.75479300  | -1.40801200 | C | 3.42121300  | -1.74404200 | 3.63846700  |
| C | 0.41973800  | 5.39251700  | 0.61820600  | C | 3.59784000  | -1.37957200 | 2.30333200  |
| H | 1.43702500  | 3.50933100  | 0.87550600  | C | 2.84462600  | -1.99572600 | 1.29620000  |
| H | -0.30389300 | 3.38983700  | 1.06045400  | C | 2.96928800  | -1.53890000 | -0.12402000 |
| C | 1.42229500  | 5.66164400  | -1.68277300 | C | 3.41321400  | -2.52673900 | -1.15102800 |
| H | 2.45919500  | 3.76828900  | -1.50352200 | C | 3.44134900  | -2.16871500 | -2.51197400 |
| H | 1.36992000  | 3.84768000  | -2.88864200 | C | 3.83870700  | -3.08080800 | -3.48272900 |
| C | 1.51506900  | 6.07563000  | -0.20943400 | C | 4.22502400  | -4.37517400 | -3.11725500 |
| H | 0.51444800  | 5.66385900  | 1.67701300  | C | 4.21987600  | -4.73780400 | -1.77136000 |
| H | -0.56539700 | 5.75448100  | 0.28734000  | C | 3.81982300  | -3.82206200 | -0.79634700 |
| H | 2.23075400  | 6.12403000  | -2.26277100 | N | 2.73194100  | -0.33631900 | -0.51380300 |
| H | 0.47777900  | 6.03641900  | -2.10491800 | H | 1.33048200  | -3.46195500 | 0.86809300  |
| H | 1.44311600  | 7.16639100  | -0.11305400 | H | 1.01211500  | -4.11291700 | 3.23904300  |
| H | 2.49826000  | 5.78200500  | 0.18535400  | H | 4.00923200  | -1.25612000 | 4.41083700  |
| C | -0.61573000 | -1.18813200 | -2.51788800 | H | 4.31141900  | -0.60507600 | 2.04112200  |
| C | -0.57866200 | -1.53880500 | -4.01340600 | H | 3.14121000  | -1.16580800 | -2.79293700 |

|   |             |             |             |
|---|-------------|-------------|-------------|
| H | 3.84647600  | -2.78484800 | -4.52826200 |
| H | 4.52771300  | -5.73637000 | -1.47373200 |
| H | 3.82707000  | -4.11829100 | 0.24614500  |
| H | 4.53058700  | -5.08971300 | -3.87644800 |
| H | 2.34523900  | -3.00197400 | 5.02143900  |
| C | 1.28648400  | 0.42602400  | 1.37259500  |
| O | 1.28094700  | 1.20968500  | 2.47711700  |
| O | 0.33924900  | -0.33295500 | 1.13479700  |
| C | 0.11678200  | 1.11964700  | 3.31230900  |
| H | -0.78212800 | 1.39585300  | 2.76039200  |
| H | 0.28877400  | 1.82690700  | 4.12488800  |
| H | 0.00338200  | 0.10909200  | 3.70901200  |
| C | 4.30349900  | 1.95017000  | -0.50192700 |
| C | 3.47008700  | 1.68412200  | 0.60825400  |
| C | 3.73931600  | 2.39619200  | 1.79307800  |
| C | 4.76860300  | 3.33946400  | 1.85101600  |
| C | 5.56737000  | 3.60202000  | 0.73928100  |
| C | 5.32699300  | 2.89121900  | -0.43977200 |
| H | 4.13094500  | 1.40722600  | -1.42405600 |
| H | 3.14256000  | 2.21264900  | 2.67424600  |
| H | 4.94541200  | 3.86794100  | 2.78494400  |
| H | 6.36583500  | 4.33718000  | 0.79051300  |
| H | 5.93945000  | 3.07094000  | -1.32012000 |
| C | 2.34332700  | 0.72016300  | 0.40281900  |
